# Supplementary material for: A Network Pharmacology-Based Approach to Explore Therapeutic Mechanism of Indian Herbal Formulation Nisha Amalaki in Treating Type 2 Diabetes Mellitus
Source: Research Square preprint supplement (doi:10.21203/rs.3.rs-954990/v1), 2021-10-13
Supplement: Supplementary file 1 [file 2a2a80aec54db6b1b3c1b039.xlsx]

## Sheet: Sheet1
Supplementary file 3: Targets-pathways relationship of Nisha Amlaki
KEGG Pathway	Pathway KEGG ID	Total	Expected	Hits	Rich fator	P.Value	FDR	Target(s)
Pathways in cancer	hsa05200	530	2.81	23	0.0433962	6.64e-17	2.11e-14	MMP2,NFKB1,IL2,CCND1,EP300,PPARG,FOS,TERT,PPARD,MMP1,GSK3B,SMAD3,ESR2,JUN,MMP9,HDAC1,NFE2L2,BCL2,RELA,ESR1,RXRA,HDAC2,AKT1
Endocrine resistance	hsa01522	98	0.519	10	0.102041	5.4e-11	7.05e-09	MMP2,CCND1,FOS,ESR2,JUN,MMP9,SRC,BCL2,ESR1,AKT1
Prolactin signaling pathway	hsa04917	70	0.371	9	0.128571	6.65e-11	7.05e-09	NFKB1,CCND1,FOS,GSK3B,ESR2,SRC,RELA,ESR1,AKT1
Thyroid hormone signaling pathway	hsa04919	116	0.615	10	0.0862069	2.94e-10	2.34e-08	CCND1,EP300,HDAC3,GSK3B,HDAC1,SRC,ESR1,RXRA,HDAC2,AKT1
Measles	hsa05162	138	0.731	10	0.0724638	1.64e-09	9.36e-08	CSNK2A1,NFKB1,IL2,CCND1,GSK3B,RELA,AKT1
Fluid shear stress and atherosclerosis	hsa05418	139	0.737	10	0.0719424	1.77e-09	9.36e-08	MMP2,NFKB1,FOS,JUN,MMP9,SRC,NFE2L2,BCL2,RELA,AKT1
Viral carcinogenesis	hsa05203	201	1.07	11	0.0547264	4.42e-09	2.01e-07	NFKB1,CCND1,EP300,HDAC3,JUN,HDAC1,HDAC8,SRC,RELA,HDAC9,HDAC2
Hepatitis B	hsa05161	163	0.864	10	0.0613497	8.35e-09	3.32e-07	NFKB1,CCND1,EP300,FOS,SMAD3,JUN,MMP9,SRC,BCL2,RELA,AKT1
IL-17 signaling pathway	hsa04657	93	0.493	8	0.0860215	2.22e-08	7.84e-07	NFKB1,MMP13,FOS,MMP1,GSK3B,JUN,MMP9,RELA
Estrogen signaling pathway	hsa04915	138	0.731	9	0.0652174	3.04e-08	8.96e-07	MMP2,FOS,ESR2,JUN,MMP9,SRC,BCL2,ESR1,AKT1
Prostate cancer	hsa05215	97	0.514	8	0.0824742	3.1e-08	8.96e-07	NFKB1,CCND1,EP300,GSK3B,MMP9,BCL2,RELA,AKT1
AGE-RAGE signaling pathway in diabetic complications	hsa04933	100	0.53	8	0.08	3.95e-08	1.04e-06	MMP2,NFKB1,CCND1,SMAD3,JUN,BCL2,RELA,AKT1
T cell receptor signaling pathway	hsa04660	101	0.535	8	0.0792079	4.27e-08	1.04e-06	NFKB1,IL2,MAP3K8,FOS,GSK3B,JUN,RELA,AKT1
Chronic myeloid leukemia	hsa05220	76	0.403	7	0.0921053	1.15e-07	2.6e-06	NFKB1,CCND1,SMAD3,HDAC1,RELA,HDAC2,AKT1
HTLV-I infection	hsa05166	219	1.16	10	0.0456621	1.4e-07	2.96e-06	NFKB1,IL2,CCND1,EP300,FOS,TERT,GSK3B,SMAD3,JUN,RELA,AKT1
Colorectal cancer	hsa05210	86	0.456	7	0.0813953	2.71e-07	5.39e-06	CCND1,FOS,GSK3B,SMAD3,JUN,BCL2,AKT1
Kaposi's sarcoma-associated herpesvirus infection	hsa05167	186	0.986	9	0.0483871	3.99e-07	7.46e-06	NFKB1,CCND1,EP300,FOS,GSK3B,JUN,SRC,RELA,AKT1
Chagas disease (American trypanosomiasis)	hsa05142	103	0.546	7	0.0679612	9.36e-07	1.65e-05	NFKB1,IL2,FOS,SMAD3,JUN,RELA,AKT1
Th17 cell differentiation	hsa04659	107	0.567	7	0.0654206	1.21e-06	2.03e-05	NFKB1,IL2,FOS,SMAD3,JUN,RELA,RXRA
TNF signaling pathway	hsa04668	110	0.583	7	0.0636364	1.46e-06	2.33e-05	NFKB1,MAP3K8,FOS,JUN,MMP9,RELA,AKT1
B cell receptor signaling pathway	hsa04662	71	0.376	6	0.084507	1.68e-06	2.55e-05	NFKB1,FOS,GSK3B,JUN,RELA,AKT1
Bladder cancer	hsa05219	41	0.217	5	0.121951	2.12e-06	3.06e-05	MMP2,CCND1,MMP1,MMP9,SRC
Cell cycle	hsa04110	124	0.657	7	0.0564516	3.28e-06	4.53e-05	CCND1,EP300,PLK1,GSK3B,SMAD3,HDAC1,HDAC2
Apoptosis	hsa04210	136	0.721	7	0.0514706	6.07e-06	8.04e-05	NFKB1,FOS,MCL1,JUN,BCL2,RELA,AKT1
Small cell lung cancer	hsa05222	93	0.493	6	0.0645161	8.21e-06	0.000101	NFKB1,CCND1,BCL2,RELA,RXRA,AKT1
Epstein-Barr virus infection	hsa05169	201	1.07	8	0.039801	8.26e-06	0.000101	CSNK2A1,NFKB1,EP300,GSK3B,JUN,HDAC1,BCL2,RELA,HDAC2,AKT1
Breast cancer	hsa05224	147	0.779	7	0.047619	1.01e-05	0.000119	CCND1,FOS,GSK3B,ESR2,JUN,ESR1,AKT1
PI3K-Akt signaling pathway	hsa04151	354	1.88	10	0.0282486	1.11e-05	0.000126	NFKB1,IL2,CCND1,GSK3B,MCL1,BCL2,RELA,RXRA,NR4A1,AKT1
Toll-like receptor signaling pathway	hsa04620	104	0.551	6	0.0576923	1.57e-05	0.000172	NFKB1,MAP3K8,FOS,JUN,RELA,AKT1
Wnt signaling pathway	hsa04310	158	0.837	7	0.0443038	1.63e-05	0.000172	CSNK2A1,CCND1,EP300,PPARD,GSK3B,SMAD3,JUN
Inflammatory bowel disease (IBD)	hsa05321	65	0.344	5	0.0769231	2.12e-05	0.000218	NFKB1,IL2,SMAD3,JUN,RELA
Acute myeloid leukemia	hsa05221	66	0.35	5	0.0757576	2.29e-05	0.000228	NFKB1,CCND1,PPARD,RELA,AKT1
Neurotrophin signaling pathway	hsa04722	119	0.631	6	0.0504202	3.38e-05	0.000326	NFKB1,GSK3B,JUN,BCL2,RELA,AKT1
PPAR signaling pathway	hsa03320	74	0.392	5	0.0675676	4e-05	0.000374	PPARG,PPARD,MMP1,FABP3,RXRA
Pancreatic cancer	hsa05212	75	0.397	5	0.0666667	4.27e-05	0.000388	NFKB1,CCND1,SMAD3,RELA,AKT1
Transcriptional misregulation in cancer	hsa05202	186	0.986	7	0.0376344	4.67e-05	0.000412	NFKB1,PPARG,MMP9,HDAC1,RELA,RXRA,HDAC2
Osteoclast differentiation	hsa04380	128	0.678	6	0.046875	5.1e-05	0.000438	NFKB1,PPARG,FOS,JUN,RELA,AKT1
FoxO signaling pathway	hsa04068	132	0.699	6	0.0454545	6.06e-05	0.000507	CCND1,EP300,PLK4,PLK1,SMAD3,AKT1
Th1 and Th2 cell differentiation	hsa04658	92	0.488	5	0.0543478	0.000114	0.000929	NFKB1,IL2,FOS,JUN,RELA
Non-alcoholic fatty liver disease (NAFLD)	hsa04932	149	0.79	6	0.0402685	0.000119	0.000945	NFKB1,GSK3B,JUN,RELA,RXRA,AKT1
MicroRNAs in cancer	hsa05206	299	1.58	8	0.0267559	0.000142	0.0011	NFKB1,CCND1,EP300,DNMT1,MCL1,MMP9,HDAC1,BCL2
Hepatitis C	hsa05160	155	0.821	6	0.0387097	0.000148	0.00112	NFKB1,GSK3B,RELA,RXRA,AKT1
HIF-1 signaling pathway	hsa04066	100	0.53	5	0.05	0.000169	0.00125	NFKB1,EP300,BCL2,RELA,AKT1
Jak-STAT signaling pathway	hsa04630	162	0.858	6	0.037037	0.000188	0.00136	IL2,CCND1,EP300,MCL1,BCL2,AKT1
Longevity regulating pathway - multiple species	hsa04213	62	0.329	4	0.0645161	0.000303	0.00214	HDAC1,HDAC2,CRYAB,AKT1
Tuberculosis	hsa05152	179	0.949	6	0.0335196	0.000323	0.00224	NFKB1,EP300,SRC,BCL2,RELA,AKT1
Mitophagy - animal	hsa04137	65	0.344	4	0.0615385	0.000364	0.00246	CSNK2A1,JUN,SRC,RELA
Epithelial cell signaling in Helicobacter pylori infection	hsa05120	68	0.36	4	0.0588235	0.000433	0.00287	NFKB1,JUN,SRC,RELA
Adipocytokine signaling pathway	hsa04920	69	0.366	4	0.057971	0.000458	0.00297	NFKB1,RELA,RXRA,AKT1
Adherens junction	hsa04520	72	0.382	4	0.0555556	0.000538	0.00342	CSNK2A1,EP300,SMAD3,SRC
Focal adhesion	hsa04510	199	1.05	6	0.0301508	0.00057	0.00355	CCND1,GSK3B,JUN,SRC,BCL2,AKT1
Leishmaniasis	hsa05140	74	0.392	4	0.0540541	0.000597	0.0036	NFKB1,FOS,JUN,RELA
Proteoglycans in cancer	hsa05205	201	1.07	6	0.0298507	0.000601	0.0036	MMP2,CCND1,MMP9,SRC,ESR1,AKT1
Pertussis	hsa05133	76	0.403	4	0.0526316	0.000661	0.00389	NFKB1,FOS,JUN,RELA
EGFR tyrosine kinase inhibitor resistance	hsa01521	79	0.419	4	0.0506329	0.000765	0.00443	GSK3B,SRC,BCL2,AKT1
cAMP signaling pathway	hsa04024	212	1.12	6	0.0283019	0.000795	0.00448	NFKB1,EP300,FOS,JUN,RELA,AKT1
MAPK signaling pathway	hsa04010	295	1.56	7	0.0237288	0.000803	0.00448	NFKB1,MAP3K8,FOS,JUN,RELA,NR4A1,AKT1
Thyroid cancer	hsa05216	37	0.196	3	0.0810811	0.000947	0.00519	CCND1,PPARG,RXRA
ErbB signaling pathway	hsa04012	85	0.45	4	0.0470588	0.00101	0.00543	GSK3B,JUN,SRC,AKT1
Salmonella infection	hsa05132	86	0.456	4	0.0465116	0.00105	0.00558	NFKB1,FOS,JUN,RELA
Longevity regulating pathway	hsa04211	89	0.472	4	0.0449438	0.0012	0.00624	NFKB1,PPARG,RELA,AKT1
Cellular senescence	hsa04218	160	0.848	5	0.03125	0.00146	0.00748	NFKB1,CCND1,SMAD3,RELA,AKT1
NF-kappa B signaling pathway	hsa04064	100	0.53	4	0.04	0.00184	0.00931	CSNK2A1,NFKB1,BCL2,RELA
Insulin resistance	hsa04931	108	0.572	4	0.037037	0.00191	0.00947	NFKB1,GSK3B,RELA,AKT1
Notch signaling pathway	hsa04330	48	0.254	3	0.0625	0.00202	0.00991	EP300,HDAC1,HDAC2
