# Supplementary material for: A Network Pharmacology-Based Approach to Explore Therapeutic Mechanism of Indian Herbal Formulation Nisha Amalaki in Treating Type 2 Diabetes Mellitus
Source: Research Square preprint supplement (doi:10.21203/rs.3.rs-954990/v1), 2021-10-13
Supplement: Supplementary file 2 [file e620814ff3ba3c3e3392e3f2.xlsx]

## Sheet: NA Targets
Supplementary File 2
Target profile of Nisha Amlaki (CL: Curcuma longa; EO: Emblica officinalis)
Source	Canonical SMILES	Ingredient	Target Name	Description	P-Value	TC max ( ≥ 0.6)
EO	[C@H]1([C@H]([C@@H]([C@H](O[C@H]1OC(=O)c1cc(c(c(c1)O)O)O)COC(=O)c1cc(c(c(c1)O)O)O)O)OC(=O)c1cc(c(c(c1)O)O)O)OC(=O)c1cc(c(c(c1)O)O)O	1,2,3,6-Tetra-O-galloyl-beta-D-glucose	AMY1A	Alpha-amylase 1	2.054e-41	0.81
EO	[C@H]1([C@H]([C@@H]([C@H](O[C@H]1OC(=O)c1cc(c(c(c1)O)O)O)COC(=O)c1cc(c(c(c1)O)O)O)OC(=O)c1cc(c(c(c1)O)O)O)O)OC(=O)c1cc(c(c(c1)O)O)O	1,2,4,6-Tetra-O-galloyl-beta-D-glucose	AMY1A	Alpha-amylase 1	2.054e-41	0.81
EO	[C@H]1([C@H]([C@@H]([C@H](O[C@H]1OC(=O)c1cc(c(c(c1)O)O)O)COC(=O)c1cc(c(c(c1)O)O)O)O)OC(=O)c1cc(c(c(c1)O)O)O)OC(=O)c1cc(c(c(c1)O)O)O	1,2,3,6-Tetra-O-galloyl-beta-D-glucose	ANTXR2	Anthrax toxin receptor 2	8.015e-50	0.81
EO	[C@H]1([C@H]([C@@H]([C@H](O[C@H]1OC(=O)c1cc(c(c(c1)O)O)O)COC(=O)c1cc(c(c(c1)O)O)O)OC(=O)c1cc(c(c(c1)O)O)O)O)OC(=O)c1cc(c(c(c1)O)O)O	1,2,4,6-Tetra-O-galloyl-beta-D-glucose	ANTXR2	Anthrax toxin receptor 2	8.015e-50	0.81
EO	c1(c(c(cc(c1)C(=O)OCC)O)O)O	Ethyl gallate	CA12	Carbonic anhydrase 12	1.226e-07	0.68
EO	c1(c(c(cc(c1)C(=O)OCC)O)O)O	Ethyl gallate	CA14	Carbonic anhydrase 14	9.268e-18	0.68
EO	c1(c(c(cc(c1)C(=O)OCC)O)O)O	Ethyl gallate	CA7	Carbonic anhydrase 7	1.332e-15	0.68
EO	c1(c(c(cc(c1)C(=O)OCC)O)O)O	Ethyl gallate	CA9	Carbonic anhydrase 9	1.935e-06	0.68
EO	c1(c(c(cc2c1c1c(C(=O)O[C@H]3[C@H]([C@H](O[C@@H](COC2=O)[C@@H]3OC(=O)c2cc(c(c(c2)O)O)O)OC(=O)c2cc(c(c(c2)O)O)O)OC(=O)c2cc(c(c(c2)O)O)O)cc(c(c1O)O)O)O)O)O	Punicafolin	F2	Prothrombin	2.013e-06	0.85
EO	c1(c(c(cc2c1c1c(C(=O)O[C@H]3[C@H]([C@H](O[C@@H](COC2=O)[C@@H]3OC(=O)c2cc(c(c(c2)O)O)O)OC(=O)c2cc(c(c(c2)O)O)O)O)cc(c(c1O)O)O)O)O)O	Tercatain	F2	Prothrombin	2.945e-06	0.79
EO	c1c(c(ccc1)CC(=O)O)O[C@@H]1O[C@@H]([C@H]([C@@H]([C@H]1O)O)O)CO	Glochidacuminoside A	fimH	Type 1 fimbrin D-mannose specific adhesin	3.14e-216	0.65
EO	c1(c(c(cc(c1)C(=O)OCC)O)O)O	Ethyl gallate	FUT7	Alpha-(1,3)-fucosyltransferase 7	4.637e-61	0.61
EO	[C@H]1([C@H]([C@@H]([C@H](O[C@H]1OC(=O)c1cc(c(c(c1)O)O)O)COC(=O)c1cc(c(c(c1)O)O)O)O)OC(=O)c1cc(c(c(c1)O)O)O)OC(=O)c1cc(c(c(c1)O)O)O	1,2,3,6-Tetra-O-galloyl-beta-D-glucose	NS3	Genome polyprotein	0.0001675	1
EO	c1(c(c(cc(c1)C(=O)O[C@@H](CC(=O)O)C(=O)O)O)O)O	L-Malic acid 2-O-gallate	pol	Integrase	5.296e-08	0.62
EO	c1(c(c(cc(c1)C(=O)O[C@H]([C@H]([C@H]([C@@H](C(=O)OC)O)O)O)C(=O)O)O)O)O	Mucic acid 6-methyl ester 2-O-gallate	pol	Integrase	2.755e-06	0.63
EO	[C@H]1([C@H]([C@@H]([C@H](O[C@H]1OC(=O)c1cc(c(c(c1)O)O)O)COC(=O)c1cc(c(c(c1)O)O)O)O)OC(=O)c1cc(c(c(c1)O)O)O)OC(=O)c1cc(c(c(c1)O)O)O	1,2,3,6-Tetra-O-galloyl-beta-D-glucose	SERPINE1	Plasminogen activator inhibitor 1	8.801e-30	0.81
EO	[C@H]1([C@H]([C@@H]([C@H](O[C@H]1OC(=O)c1cc(c(c(c1)O)O)O)COC(=O)c1cc(c(c(c1)O)O)O)OC(=O)c1cc(c(c(c1)O)O)O)O)OC(=O)c1cc(c(c(c1)O)O)O	1,2,4,6-Tetra-O-galloyl-beta-D-glucose	SERPINE1	Plasminogen activator inhibitor 1	8.801e-30	0.81
EO	c1(c(c(cc(c1)C(=O)OCC)O)O)O	Ethyl gallate	SERPINE1	Plasminogen activator inhibitor 1	4.388e-28	0.7
EO	c1c(c(ccc1)CC(=O)O)O[C@@H]1O[C@@H]([C@H]([C@@H]([C@H]1O)O)O)CO	Glochidacuminoside A	SLC5A1	Sodium/glucose cotransporter 1	2.25e-98	0.61
EO	c1c(c(ccc1)CC(=O)O)O[C@@H]1O[C@@H]([C@H]([C@@H]([C@H]1O)O)O)CO	Glochidacuminoside A	SLC5A2	Sodium/glucose cotransporter 2	1.361e-228	0.65
EO	c1c(c(ccc1)CC(=O)O)O[C@@H]1O[C@@H]([C@H]([C@@H]([C@H]1O)O)O)CO	Glochidacuminoside A	SLC5A4	Solute carrier family 5 member 4	9.434e-94	0.61
EO	[C@H]1([C@H]([C@@H]([C@H](O[C@H]1OC(=O)c1cc(c(c(c1)O)O)O)COC(=O)c1cc(c(c(c1)O)O)O)O)OC(=O)c1cc(c(c(c1)O)O)O)OC(=O)c1cc(c(c(c1)O)O)O	1,2,3,6-Tetra-O-galloyl-beta-D-glucose	Sqle	Squalene monooxygenase	1.035e-88	0.86
EO	[C@H]1([C@H]([C@@H]([C@H](O[C@H]1OC(=O)c1cc(c(c(c1)O)O)O)COC(=O)c1cc(c(c(c1)O)O)O)OC(=O)c1cc(c(c(c1)O)O)O)O)OC(=O)c1cc(c(c(c1)O)O)O	1,2,4,6-Tetra-O-galloyl-beta-D-glucose	Sqle	Squalene monooxygenase	8.016e-89	0.86
EO	c1(c(c(cc(c1)C(=O)OCC)O)O)O	Ethyl gallate	Sqle	Squalene monooxygenase	3.586e-109	1
EO	c1(c(cc2c(c1O)c1c(C(=O)O[C@@H]3[C@@H](O[C@H]([C@H](OC2=O)[C@@H]3O)CO)OC(=O)c2cc(c(c(c2)O)O)O)cc(c(c1O)O)O)O)O	Phyllanemblinin B	Sqle	Squalene monooxygenase	2.854e-73	0.61
EO	[C@H]12[C@](Oc3c1c(cc(c3O)O)C(=O)O[C@@H]1[C@@H]3[C@H](OC(=O)[C@@H]2CC(=O)O)[C@H](O[C@H]1OC(=O)c1cc(c(c(c1)O)O)O)COC(=O)c1cc(c(c(c1c1c(C(=O)O3)cc(c(c1O)O)O)O)O)O)(C(=O)O)O	Phyllanemblinin C	Sqle	Squalene monooxygenase	1.546e-64	0.75
EO	c1(c(c(cc2c1c1c(C(=O)O[C@H]3[C@H]([C@H](O[C@@H](COC2=O)[C@@H]3OC(=O)c2cc(c(c(c2)O)O)O)OC(=O)c2cc(c(c(c2)O)O)O)OC(=O)c2cc(c(c(c2)O)O)O)cc(c(c1O)O)O)O)O)O	Punicafolin	Sqle	Squalene monooxygenase	7.379e-86	0.85
EO	c1(c(c(cc2c1c1c(C(=O)O[C@H]3[C@H]([C@H](O[C@@H](COC2=O)[C@@H]3OC(=O)c2cc(c(c(c2)O)O)O)OC(=O)c2cc(c(c(c2)O)O)O)O)cc(c(c1O)O)O)O)O)O	Tercatain	Sqle	Squalene monooxygenase	2.073e-83	0.87
EO	c1(c(cc2c(c1O)c1c(C(=O)O[C@@H]3[C@@H](O[C@H]([C@H](OC2=O)[C@@H]3O)CO)OC(=O)c2cc(c(c(c2)O)O)O)cc(c(c1O)O)O)O)O	Phyllanemblinin B	TNNC1	Troponin C, slow skeletal and cardiac muscles	5.669e-10	0.61
EO	c1(c(c(cc2c1c1c(C(=O)O[C@H]3[C@H]([C@H](O[C@@H](COC2=O)[C@@H]3OC(=O)c2cc(c(c(c2)O)O)O)OC(=O)c2cc(c(c(c2)O)O)O)OC(=O)c2cc(c(c(c2)O)O)O)cc(c(c1O)O)O)O)O)O	Punicafolin	TNNC1	Troponin C, slow skeletal and cardiac muscles	5.667e-06	0.77
EO	c1(c(c(cc2c1c1c(C(=O)O[C@H]3[C@H]([C@H](O[C@@H](COC2=O)[C@@H]3OC(=O)c2cc(c(c(c2)O)O)O)OC(=O)c2cc(c(c(c2)O)O)O)O)cc(c(c1O)O)O)O)O)O	Tercatain	TNNC1	Troponin C, slow skeletal and cardiac muscles	1.076e-06	0.87
EO	c1(c(cc2c(c1O)c1c(C(=O)O[C@@H]3[C@@H](O[C@H]([C@H](OC2=O)[C@@H]3O)CO)OC(=O)c2cc(c(c(c2)O)O)O)cc(c(c1O)O)O)O)O	Phyllanemblinin B	TNNI3	Troponin I, cardiac muscle	5.669e-10	0.61
EO	c1(c(c(cc2c1c1c(C(=O)O[C@H]3[C@H]([C@H](O[C@@H](COC2=O)[C@@H]3OC(=O)c2cc(c(c(c2)O)O)O)OC(=O)c2cc(c(c(c2)O)O)O)OC(=O)c2cc(c(c(c2)O)O)O)cc(c(c1O)O)O)O)O)O	Punicafolin	TNNI3	Troponin I, cardiac muscle	5.667e-06	0.77
EO	c1(c(c(cc2c1c1c(C(=O)O[C@H]3[C@H]([C@H](O[C@@H](COC2=O)[C@@H]3OC(=O)c2cc(c(c(c2)O)O)O)OC(=O)c2cc(c(c(c2)O)O)O)O)cc(c(c1O)O)O)O)O)O	Tercatain	TNNI3	Troponin I, cardiac muscle	1.076e-06	0.87
EO	c1(c(cc2c(c1O)c1c(C(=O)O[C@@H]3[C@@H](O[C@H]([C@H](OC2=O)[C@@H]3O)CO)OC(=O)c2cc(c(c(c2)O)O)O)cc(c(c1O)O)O)O)O	Phyllanemblinin B	TNNT2	Troponin T, cardiac muscle	5.669e-10	0.61
EO	c1(c(c(cc2c1c1c(C(=O)O[C@H]3[C@H]([C@H](O[C@@H](COC2=O)[C@@H]3OC(=O)c2cc(c(c(c2)O)O)O)OC(=O)c2cc(c(c(c2)O)O)O)OC(=O)c2cc(c(c(c2)O)O)O)cc(c(c1O)O)O)O)O)O	Punicafolin	TNNT2	Troponin T, cardiac muscle	5.667e-06	0.77
EO	c1(c(c(cc2c1c1c(C(=O)O[C@H]3[C@H]([C@H](O[C@@H](COC2=O)[C@@H]3OC(=O)c2cc(c(c(c2)O)O)O)OC(=O)c2cc(c(c(c2)O)O)O)O)cc(c(c1O)O)O)O)O)O	Tercatain	TNNT2	Troponin T, cardiac muscle	1.076e-06	0.87
EO	c1(cc2c(c(c1)O)C(=O)C[C@H](O2)c1cc(c(cc1)O)O)O[C@H]1[C@H]([C@H]([C@@H]([C@H](O1)COC(=O)c1cc(c(c(c1)O)O)O)O)O)O	(2S)-5,7,3',4'-Tetrahydroxyflavanone 7-(6-galloylglucoside)		Neuraminidase	6.513e-06	0.63
EO	c1(cc2c(c(c1)O)C(=O)C[C@H](O2)c1cc(c(cc1)O)O)O[C@H]1[C@@H]([C@H]([C@@H]([C@H](O1)COC(=O)/C=C/c1ccc(cc1)O)O)O)O	(2S)-5,7,3',4'-Tetrahydroxyflavanone 7-(6-p-coumaroylglucoside)		Neuraminidase	6.07e-07	0.64
EO	[C@H]1([C@H]([C@@H]([C@H](O[C@H]1OC(=O)c1cc(c(c(c1)O)O)O)COC(=O)c1cc(c(c(c1)O)O)O)O)OC(=O)c1cc(c(c(c1)O)O)O)OC(=O)c1cc(c(c(c1)O)O)O	1,2,3,6-Tetra-O-galloyl-beta-D-glucose		Genome polyprotein	4.085e-11	0.81
EO	[C@H]1([C@H]([C@@H]([C@H](O[C@H]1OC(=O)c1cc(c(c(c1)O)O)O)COC(=O)c1cc(c(c(c1)O)O)O)O)OC(=O)c1cc(c(c(c1)O)O)O)OC(=O)c1cc(c(c(c1)O)O)O	1,2,3,6-Tetra-O-galloyl-beta-D-glucose		Neuraminidase	1.022e-33	0.66
EO	[C@H]1([C@H]([C@@H]([C@H](O[C@H]1OC(=O)c1cc(c(c(c1)O)O)O)COC(=O)c1cc(c(c(c1)O)O)O)OC(=O)c1cc(c(c(c1)O)O)O)O)OC(=O)c1cc(c(c(c1)O)O)O	1,2,4,6-Tetra-O-galloyl-beta-D-glucose		Genome polyprotein	2.255e-11	0.81
EO	[C@H]1([C@H]([C@@H]([C@H](O[C@H]1OC(=O)c1cc(c(c(c1)O)O)O)COC(=O)c1cc(c(c(c1)O)O)O)OC(=O)c1cc(c(c(c1)O)O)O)O)OC(=O)c1cc(c(c(c1)O)O)O	1,2,4,6-Tetra-O-galloyl-beta-D-glucose		Neuraminidase	1.624e-35	0.7
EO	c1(cc(c2c(c1)O[C@@H]([C@@H](C2)OC(=O)c1cc(c(c(c1)O)O)O)c1cc(c(c(c1)O)O)O)O)O	Epigallocatechin gallate	ABCB1	ATP-dependent translocase ABCB1	2.207e-19	1
EO	c1(cc(c2c(c1)oc(c(c2=O)O)c1ccc(cc1)O)O)O	Kaempferol	ABCB1	ATP-dependent translocase ABCB1	4.608e-17	0.81
EO	c1(cc(c2c(c1)oc(c(c2=O)O)c1ccc(c(c1)O)O)O)O	Quercetin	ABCB1	ATP-dependent translocase ABCB1	4.552e-15	0.72
EO	c1(cc(c2c(c1)oc(c(c2=O)O)c1ccc(cc1)O)O)O	Kaempferol	Abcb1a	ATP-dependent translocase ABCB1	6.135e-58	0.81
EO	c1(cc(c2c(c1)oc(c(c2=O)O)c1ccc(c(c1)O)O)O)O	Quercetin	Abcb1a	ATP-dependent translocase ABCB1	1.639e-59	0.72
EO	c1(cc(c2c(c1)oc(c(c2=O)O)c1ccc(cc1)O)O)O	Kaempferol	ABCC1	Multidrug resistance-associated protein 1	8.019e-12	0.78
EO	c1(cc(c2c(c1)oc(c(c2=O)O)c1ccc(c(c1)O)O)O)O	Quercetin	ABCC1	Multidrug resistance-associated protein 1	2.337e-12	1
EO	c1(cc(c2c(c1)oc(c(c2=O)O)c1ccc(cc1)O)O)O	Kaempferol	ABCG2	Broad substrate specificity ATP-binding cassette transporter ABCG2	9.51e-19	0.78
EO	c1(cc(c2c(c1)O[C@@H](CC2=O)c1ccc(cc1)O)O)O	Naringenin	ABCG2	Broad substrate specificity ATP-binding cassette transporter ABCG2	4.706e-07	0.61
EO	c1(cc(c2c(c1)oc(c(c2=O)O)c1ccc(c(c1)O)O)O)O	Quercetin	ABCG2	Broad substrate specificity ATP-binding cassette transporter ABCG2	8.364e-18	1
EO	OC[C@H]1O[C@@H](Oc2c(oc3c(c2=O)c(O)cc(c3)O)c2ccc(cc2)O)[C@@H]([C@H]([C@@H]1O)O)O	Astragalin	ACHE	Acetylcholinesterase	0.02643	1
EO	c1(cc(c2c(c1)O[C@@H](CC2=O)c1ccc(cc1)O)O)O	Naringenin	Ache	Acetylcholinesterase	2.998e-15	0.61
EO	c1(cc(c2c(c1)oc(c(c2=O)O[C@H]1[C@@H]([C@H]([C@@H]([C@H](O1)CO[C@H]1[C@H]([C@H]([C@H]([C@@H](O1)C)O)O)O)O)O)O)c1ccc(c(c1)O)O)O)O	Rutin	ACHE	Acetylcholinesterase	0.1968	1
EO	c1(cc(c2c(c1)oc(c(c2=O)O)c1ccc(cc1)O)O)O	Kaempferol	ACP1	Low molecular weight phosphotyrosine protein phosphatase	1.099e-59	0.75
EO	c1(cc(c2c(c1)oc(c(c2=O)O)c1ccc(c(c1)O)O)O)O	Quercetin	ACP1	Low molecular weight phosphotyrosine protein phosphatase	3.773e-53	0.67
EO	c1(cc(c2c(c1)oc(c(c2=O)O)c1ccc(c(c1)O)O)O)O	Quercetin	Adora1	Adenosine receptor A1	0.0002815	1
EO	c1(cc(c2c(c1)oc(c(c2=O)O)c1ccc(c(c1)O)O)O)O	Quercetin	Adora2a	Adenosine receptor A2a	0.003137	1
EO	c1(cc(c2c(c1)oc(c(c2=O)O[C@H]1[C@@H]([C@H]([C@@H]([C@H](O1)CO[C@H]1[C@H]([C@H]([C@H]([C@@H](O1)C)O)O)O)O)O)O)c1ccc(c(c1)O)O)O)O	Rutin	ADRA2A	Alpha-2A adrenergic receptor	0.1002	1
EO	c1(cc(c2c(c1)oc(c(c2=O)O[C@H]1[C@@H]([C@@H]([C@@H]([C@H](O1)CO)O)O)O)c1ccc(c(c1)O)O)O)O	Quercetin-3-O-glucoside	ADRA2C	Alpha-2C adrenergic receptor	0.001543	1
EO	c1(cc(c2c(c1)oc(c(c2=O)O[C@H]1[C@@H]([C@H]([C@@H]([C@H](O1)CO[C@H]1[C@H]([C@H]([C@H]([C@@H](O1)C)O)O)O)O)O)O)c1ccc(c(c1)O)O)O)O	Rutin	ADRA2C	Alpha-2C adrenergic receptor	0.001543	1
EO	OC/C(=C/CNc1ncnc2c1[nH]cn2)/C	trans-Zeatin	AHK3	Histidine kinase 3	1.08e-33	0.66
EO	OC/C(=C/CNc1ncnc2c1[nH]cn2)/C	trans-Zeatin	AHK4	Histidine kinase 4	5.072e-26	0.66
EO	c1(cc(c2c(c1)oc(c(c2=O)O)c1ccc(cc1)O)O)O	Kaempferol	Akr1a1	Aldo-keto reductase family 1 member A1	3.005e-22	0.78
EO	c1(cc(c2c(c1)oc(c(c2=O)O)c1ccc(c(c1)O)O)O)O	Quercetin	Akr1a1	Aldo-keto reductase family 1 member A1	3.59e-28	1
EO	OC[C@H]1O[C@@H](Oc2c(oc3c(c2=O)c(O)cc(c3)O)c2ccc(cc2)O)[C@@H]([C@H]([C@@H]1O)O)O	Astragalin	Akr1b1	Aldo-keto reductase family 1 member B1	5.88e-29	1
EO	OC[C@H]1O[C@@H](Oc2c(oc3c(c2=O)c(O)cc(c3)O)c2ccc(cc2)O)[C@@H]([C@H]([C@@H]1O)O)O	Astragalin	AKR1B1	Aldo-keto reductase family 1 member B1	9.269e-13	0.85
EO	OC[C@H]1O[C@@H](Oc2c(oc3c(c2=O)c(O)cc(c3)O)c2ccc(cc2)O)[C@@H]([C@H]([C@@H]1O)O)O	Astragalin	AKR1B1	Aldo-keto reductase family 1 member B1	6.893e-09	0.64
EO	OC[C@H]1O[C@@H](Oc2c(oc3c(c2=O)c(O)cc(c3)O)c2ccc(cc2)O)[C@@H]([C@H]([C@@H]1O)O)O	Astragalin	AKR1B1	Aldo-keto reductase family 1 member B1	4.697e-08	0.64
EO	Oc1cc2c(=O)oc3c4c2c(c1O)oc(=O)c4cc(c3O)O	ellagic acid	Akr1b1	Aldo-keto reductase family 1 member B1	4.863e-14	1
EO	Oc1cc2c(=O)oc3c4c2c(c1O)oc(=O)c4cc(c3O)O	ellagic acid	AKR1B1	Aldo-keto reductase family 1 member B1	0.04967	1
EO	c1(cc(c2c(c1)oc(c(c2=O)O)c1ccc(cc1)O)O)O	Kaempferol	Akr1b1	Aldo-keto reductase family 1 member B1	1.632e-39	0.78
EO	c1(cc(c2c(c1)oc(c(c2=O)O)c1ccc(cc1)O)O)O	Kaempferol	AKR1B1	Aldo-keto reductase family 1 member B1	1.574e-10	0.78
EO	c1(cc(c2c(c1)oc(c(c2=O)O[C@@H]1O[C@H]([C@@H]([C@H]([C@@H]1O)O)O)C)c1ccc(cc1)O)O)O	Kaempferol 3-O-rhamnoside	Akr1b1	Aldo-keto reductase family 1 member B1	3.772e-33	0.85
EO	c1(cc(c2c(c1)oc(c(c2=O)O[C@@H]1O[C@H]([C@@H]([C@H]([C@@H]1O)O)O)C)c1ccc(cc1)O)O)O	Kaempferol 3-O-rhamnoside	AKR1B1	Aldo-keto reductase family 1 member B1	3.36e-10	0.85
EO	c1(cc(c2c(c1)oc(c(c2=O)O[C@@H]1O[C@H]([C@@H]([C@H]([C@@H]1O)O)O)C)c1ccc(cc1)O)O)O	Kaempferol 3-O-rhamnoside	AKR1B1	Aldo-keto reductase family 1 member B1	5.65e-09	0.85
EO	c1(cc(c2c(c1)oc(c(c2=O)O[C@@H]1O[C@H]([C@@H]([C@H]([C@@H]1O)O)O)C)c1cc(c(c(c1)O)O)O)O)O	Myricitrin	Akr1b1	Aldo-keto reductase family 1 member B1	5.679e-24	0.81
EO	c1(cc(c2c(c1)oc(c(c2=O)O[C@@H]1O[C@H]([C@@H]([C@H]([C@@H]1O)O)O)C)c1cc(c(c(c1)O)O)O)O)O	Myricitrin	AKR1B1	Aldo-keto reductase family 1 member B1	5.913e-10	0.81
EO	c1(cc(c2c(c1)oc(c(c2=O)O)c1ccc(c(c1)O)O)O)O	Quercetin	Akr1b1	Aldo-keto reductase family 1 member B1	4.279e-45	1
EO	c1(cc(c2c(c1)oc(c(c2=O)O)c1ccc(c(c1)O)O)O)O	Quercetin	AKR1B1	Aldo-keto reductase family 1 member B1	6.845e-11	1
EO	c1(cc(c2c(c1)oc(c(c2=O)O)c1ccc(c(c1)O)O)O)O	Quercetin	AKR1B1	Aldo-keto reductase family 1 member B1	1.11e-15	0.6
EO	c1(cc(c2c(c1)oc(c(c2=O)O[C@@H]1O[C@H]([C@@H]([C@H]([C@@H]1O)O)O)C)c1ccc(c(c1)O)O)O)O	Quercetin3-O-alpha-rhamnopyranoside	Akr1b1	Aldo-keto reductase family 1 member B1	1.905e-41	1
EO	c1(cc(c2c(c1)oc(c(c2=O)O[C@@H]1O[C@H]([C@@H]([C@H]([C@@H]1O)O)O)C)c1ccc(c(c1)O)O)O)O	Quercetin3-O-alpha-rhamnopyranoside	AKR1B1	Aldo-keto reductase family 1 member B1	2.665e-14	1
EO	c1(cc(c2c(c1)oc(c(c2=O)O[C@@H]1O[C@H]([C@@H]([C@H]([C@@H]1O)O)O)C)c1ccc(c(c1)O)O)O)O	Quercetin3-O-alpha-rhamnopyranoside	AKR1B1	Aldo-keto reductase family 1 member B1	5.651e-12	1
EO	c1(cc(c2c(c1)oc(c(c2=O)O[C@H]1[C@@H]([C@@H]([C@@H]([C@H](O1)CO)O)O)O)c1ccc(c(c1)O)O)O)O	Quercetin-3-O-glucoside	Akr1b1	Aldo-keto reductase family 1 member B1	2.302e-39	1
EO	c1(cc(c2c(c1)oc(c(c2=O)O[C@H]1[C@@H]([C@@H]([C@@H]([C@H](O1)CO)O)O)O)c1ccc(c(c1)O)O)O)O	Quercetin-3-O-glucoside	AKR1B1	Aldo-keto reductase family 1 member B1	1.887e-14	1
EO	c1(cc(c2c(c1)oc(c(c2=O)O[C@H]1[C@@H]([C@@H]([C@@H]([C@H](O1)CO)O)O)O)c1ccc(c(c1)O)O)O)O	Quercetin-3-O-glucoside	AKR1B1	Aldo-keto reductase family 1 member B1	2.528e-13	0.76
EO	c1(cc(c2c(c1)oc(c(c2=O)O[C@H]1[C@@H]([C@@H]([C@@H]([C@H](O1)CO)O)O)O)c1ccc(c(c1)O)O)O)O	Quercetin-3-O-glucoside	AKR1B1	Aldo-keto reductase family 1 member B1	2.361e-09	0.67
EO	c1(cc(c2c(c1)oc(c(c2=O)O[C@H]1[C@@H]([C@H]([C@@H]([C@H](O1)CO[C@H]1[C@H]([C@H]([C@H]([C@@H](O1)C)O)O)O)O)O)O)c1ccc(c(c1)O)O)O)O	Rutin	Akr1b1	Aldo-keto reductase family 1 member B1	4.853e-33	0.83
EO	c1(cc(c2c(c1)oc(c(c2=O)O[C@H]1[C@@H]([C@H]([C@@H]([C@H](O1)CO[C@H]1[C@H]([C@H]([C@H]([C@@H](O1)C)O)O)O)O)O)O)c1ccc(c(c1)O)O)O)O	Rutin	AKR1B1	Aldo-keto reductase family 1 member B1	1.022e-12	0.83
EO	c1(cc(c2c(c1)oc(c(c2=O)O[C@H]1[C@@H]([C@H]([C@@H]([C@H](O1)CO[C@H]1[C@H]([C@H]([C@H]([C@@H](O1)C)O)O)O)O)O)O)c1ccc(c(c1)O)O)O)O	Rutin	AKR1B1	Aldo-keto reductase family 1 member B1	1.462e-10	0.83
EO	CC(=C)C1CCC2(C1C3CCC4C5(CCC(C(C5CCC4(C3(CC2)C)C)(C)C)O)C)C	3beta-Hydroxy-20(29)-lupene	AKR1B10	Aldo-keto reductase family 1 member B10	1.011e-11	0.72
EO	C1[C@@H](C([C@H]2[C@](C1)([C@@H]1[C@@](CC2)([C@]2([C@H](CC1)[C@@H]1[C@](CC2)(C)CC[C@H]1C(=C)C)C)C)C)(C)C)O	Lupeol	AKR1B10	Aldo-keto reductase family 1 member B10	1.011e-11	0.72
EO	O=C[C@]12CC[C@@]3(C(=CC[C@H]4[C@@]3(C)CC[C@@H]3[C@]4(C)CC[C@@H](C3(C)C)O)[C@@H]2CC(CC1)(C)C)C	Oleanolic aldehyde	AKR1B10	Aldo-keto reductase family 1 member B10	5.061e-20	0.71
EO	c1(cc(c2c(c1)oc(c(c2=O)O)c1ccc(c(c1)O)O)O)O	Quercetin	AKR1B10	Aldo-keto reductase family 1 member B10	1.057e-07	0.6
EO	c1(cc(c2c(c1)oc(c(c2=O)O)c1ccc(cc1)O)O)O	Kaempferol	Akr1c21	Aldo-keto reductase family 1 member C21	1.375e-97	0.78
EO	c1(cc(c2c(c1)oc(c(c2=O)O)c1ccc(c(c1)O)O)O)O	Quercetin	Akr1c21	Aldo-keto reductase family 1 member C21	2.9e-124	1
EO	Oc1cc2c(=O)oc3c4c2c(c1O)oc(=O)c4cc(c3O)O	ellagic acid	AKT1	RAC-alpha serine/threonine-protein kinase	0.9338	1
EO	c1(cc(c2c(c1)oc(c(c2=O)O)c1ccc(c(c1)O)O)O)O	Quercetin	AKT1	RAC-alpha serine/threonine-protein kinase	0.5833	1
EO	c1(cc(c2c(c1)oc(c(c2=O)O)c1ccc(c(c1)O)O)O)O	Quercetin	ALK	ALK tyrosine kinase receptor	0.2734	1
EO	c1(cc(c2c(c1)oc(c(c2=O)O)c1ccc(cc1)O)O)O	Kaempferol	ALOX12	Arachidonate 12-lipoxygenase, 12S-type	9.095e-09	0.78
EO	c1(cc(c2c(c1)oc(c(c2=O)O)c1ccc(c(c1)O)O)O)O	Quercetin	ALOX12	Arachidonate 12-lipoxygenase, 12S-type	2.435e-11	1
EO	c1(cc(c2c(c1)oc(c(c2=O)O)c1ccc(cc1)O)O)O	Kaempferol	ALOX15	Arachidonate 15-lipoxygenase	2.337e-07	0.78
EO	c1(cc(c2c(c1)oc(c(c2=O)O)c1ccc(cc1)O)O)O	Kaempferol	ALOX15	Arachidonate 15-lipoxygenase	4.123e-07	0.78
EO	c1c(c(c(cc1)O)O)O	Pyrogallol	ALOX15	Arachidonate 15-lipoxygenase	4.897e-10	1
EO	c1(cc(c2c(c1)oc(c(c2=O)O)c1ccc(c(c1)O)O)O)O	Quercetin	ALOX15	Arachidonate 15-lipoxygenase	3.441e-08	1
EO	c1(cc(c2c(c1)oc(c(c2=O)O)c1ccc(c(c1)O)O)O)O	Quercetin	ALOX15	Arachidonate 15-lipoxygenase	1.034e-07	1
EO	c1(cc(c2c(c1)oc(c(c2=O)O)c1ccc(cc1)O)O)O	Kaempferol	ALOX5	Arachidonate 5-lipoxygenase	1.424e-09	0.78
EO	c1(cc(c2c(c1)oc(c(c2=O)O)c1ccc(c(c1)O)O)O)O	Quercetin	ALOX5	Arachidonate 5-lipoxygenase	1.443e-18	1
EO	c1(cc(c2c(c1)oc(c(c2=O)O)c1ccc(c(c1)O)O)O)O	Quercetin	Alox5	Arachidonate 5-lipoxygenase	1.11e-16	1
EO	OC[C@H]1O[C@@H](Oc2c(oc3c(c2=O)c(O)cc(c3)O)c2ccc(cc2)O)[C@@H]([C@H]([C@@H]1O)O)O	Astragalin	ALPI	Intestinal-type alkaline phosphatase	2.331e-11	0.85
EO	c1(cc(c2c(c1)oc(c(c2=O)O[C@@H]1O[C@H]([C@@H]([C@H]([C@@H]1O)O)O)C)c1ccc(cc1)O)O)O	Kaempferol 3-O-rhamnoside	ALPI	Intestinal-type alkaline phosphatase	3.782e-11	0.65
EO	c1(cc(c2c(c1)oc(c(c2=O)O[C@@H]1O[C@H]([C@@H]([C@H]([C@@H]1O)O)O)C)c1cc(c(c(c1)O)O)O)O)O	Myricitrin	ALPI	Intestinal-type alkaline phosphatase	2.509e-09	0.62
EO	c1(cc(c2c(c1)oc(c(c2=O)O[C@@H]1O[C@H]([C@@H]([C@H]([C@@H]1O)O)O)C)c1ccc(c(c1)O)O)O)O	Quercetin3-O-alpha-rhamnopyranoside	ALPI	Intestinal-type alkaline phosphatase	5.324e-13	0.77
EO	c1(cc(c2c(c1)oc(c(c2=O)O[C@H]1[C@@H]([C@@H]([C@@H]([C@H](O1)CO)O)O)O)c1ccc(c(c1)O)O)O)O	Quercetin-3-O-glucoside	ALPI	Intestinal-type alkaline phosphatase	6.994e-15	1
EO	c1(cc(c2c(c1)oc(c(c2=O)O[C@H]1[C@@H]([C@H]([C@@H]([C@H](O1)CO[C@H]1[C@H]([C@H]([C@H]([C@@H](O1)C)O)O)O)O)O)O)c1ccc(c(c1)O)O)O)O	Rutin	ALPI	Intestinal-type alkaline phosphatase	4.532e-12	0.75
EO	c1(cc(c2c(c1)O[C@@H]([C@H](C2)O)c1cc(c(cc1)O)O)O)O	Catechin	ALPL	Alkaline phosphatase, tissue-nonspecific isozyme	0.002625	1
EO	c1(cc(c2c(c1)O[C@@H]([C@@H](C2)O)c1cc(c(cc1)O)O)O)O	Epicatechin	ALPL	Alkaline phosphatase, tissue-nonspecific isozyme	0.002625	1
EO	c1(cc(c2c(c1)oc(c(c2=O)O)c1ccc(c(c1)O)O)O)O	Quercetin	ampC	Beta-lactamase	2.404e-06	1
EO	O[C@@H]1[C@@H](COC(=O)c2cc(O)c(c(c2)O)O)OC([C@@H]([C@H]1OC(=O)c1cc(O)c(c(c1)O)O)O)O	3,6-di-O-galloyl-(alpha/beta)-4C1-glucopyranose	AMY1A	Alpha-amylase 1	1.175e-32	0.64
EO	O=C(c1cc(O)c(c(c1)OC(=O)c1cc(O)c(c(c1)O)O)O)OC1C(COC(=O)c2cc(O)c(c(c2)OC(=O)c2cc(O)c(c(c2)O)O)O)OC(C(C1OC(=O)c1cc(O)c(c(c1)OC(=O)c1cc(O)c(c(c1)O)O)O)OC(=O)c1cc(O)c(c(c1)OC(=O)c1cc(O)c(c(c1)O)O)O)OC(=O)c1cc(O)c(c(c1)OC(=O)c1cc(O)c(c(c1)O)O)O.CC(=O)O.CC(=O)O	BIS(ACETIC ACID); TANNINS	AMY1A	Alpha-amylase 1	2.653e-40	0.79
EO	O[C@@H]1[C@@H](COC(=O)c2cc(O)c(c(c2)O)O)OC([C@@H]([C@H]1OC(=O)c1cc(O)c(c(c1)O)O)O)O	3,6-di-O-galloyl-(alpha/beta)-4C1-glucopyranose	ANTXR2	Anthrax toxin receptor 2	2.973e-39	0.64
EO	O=C(c1cc(O)c(c(c1)OC(=O)c1cc(O)c(c(c1)O)O)O)OC1C(COC(=O)c2cc(O)c(c(c2)OC(=O)c2cc(O)c(c(c2)O)O)O)OC(C(C1OC(=O)c1cc(O)c(c(c1)OC(=O)c1cc(O)c(c(c1)O)O)O)OC(=O)c1cc(O)c(c(c1)OC(=O)c1cc(O)c(c(c1)O)O)O)OC(=O)c1cc(O)c(c(c1)OC(=O)c1cc(O)c(c(c1)O)O)O.CC(=O)O.CC(=O)O	BIS(ACETIC ACID); TANNINS	ANTXR2	Anthrax toxin receptor 2	1.758e-48	0.79
EO	Oc1cc2c(=O)oc3c4c2c(c1O)oc(=O)c4cc(c3O)O	ellagic acid	APEX1	DNA-(apurinic or apyrimidinic site) lyase	3.384e-07	0.66
EO	c1(cc(c2c(c1)O[C@@H]([C@@H](C2)OC(=O)c1cc(c(c(c1)O)O)O)c1cc(c(c(c1)O)O)O)O)O	Epigallocatechin gallate	APP	Amyloid-beta precursor protein	0.1492	1
EO	c1(cc(c2c(c1)oc(c(c2=O)O)c1ccc(c(c1)O)O)O)O	Quercetin	APP	Amyloid-beta precursor protein	1.268e-06	1
EO	c1(cc(c2c(c1)oc(c(c2=O)O)c1ccc(c(c1)O)O)O)O	Quercetin	Arg1	Arginase-1	1.509e-47	0.6
EO	Oc1cc2c(=O)oc3c4c2c(c1O)oc(=O)c4cc(c3O)O	ellagic acid	ATG4B	Cysteine protease ATG4B	2.06e-05	1
EO	Oc1cc2c(=O)oc3c4c2c(c1O)oc(=O)c4cc(c3O)O	ellagic acid	AURKA	Aurora kinase A	0.944	1
EO	Oc1cc2c(=O)oc3c4c2c(c1O)oc(=O)c4cc(c3O)O	ellagic acid	AURKB	Aurora kinase B	0.5527	1
EO	c1(cc(c2c(c1)oc(c(c2=O)O)c1ccc(c(c1)O)O)O)O	Quercetin	AURKB	Aurora kinase B	0.1205	1
EO	c1(cc(c2c(c1)oc(c(c2=O)O)c1ccc(c(c1)O)O)O)O	Quercetin	AVPR2	Vasopressin V2 receptor	0.0297	1
EO	c1(cc(c2c(c1)oc(c(c2=O)O)c1ccc(c(c1)O)O)O)O	Quercetin	AXL	Tyrosine-protein kinase receptor UFO	0.001483	1
EO	c1(cc(c2c(c1)O[C@@H]([C@@H](C2)O)c1cc(c(c(c1)O)O)O)O)O	(-)-Epigallocatechin	BACE1	Beta-secretase 1	0.2858	1
EO	Oc1cc2c(=O)oc3c4c2c(c1O)oc(=O)c4cc(c3O)O	ellagic acid	BACE1	Beta-secretase 1	1	1
EO	c1(cc(c2c(c1)O[C@@H]([C@@H](C2)OC(=O)c1cc(c(c(c1)O)O)O)c1cc(c(c(c1)O)O)O)O)O	Epigallocatechin gallate	BACE1	Beta-secretase 1	0.0625	1
EO	c1(cc(c2c(c1)oc(c(c2=O)O)c1ccc(c(c1)O)O)O)O	Quercetin	BACE1	Beta-secretase 1	0.2119	1
EO	CCC(CCC(C)C1CCC2C1(CCC3C2CC=C4C3(CCC(C4)O)C)C)C(C)C	Phytosterols	BCHE	Carboxylic ester hydrolase	4.722e-09	0.66
EO	c1(cc(c2c(c1)O[C@@H]([C@@H](C2)OC(=O)c1cc(c(c(c1)O)O)O)c1cc(c(c(c1)O)O)O)O)O	Epigallocatechin gallate	BCL2	Apoptosis regulator Bcl-2	7.992e-05	1
EO	Oc1cc2c(=O)oc3c4c2c(c1O)oc(=O)c4cc(c3O)O	ellagic acid	BRAF	Serine/threonine-protein kinase B-raf	0.9793	1
EO	c1(cc(c2c(c1)oc(c(c2=O)O)c1ccc(c(c1)O)O)O)O	Quercetin	BRAF	Serine/threonine-protein kinase B-raf	0.8909	1
EO	c1(c(cc(cc1O)C(=O)O)O)O	Gallic acid	ca	Carbonic anhydrase	2.928e-101	1
EO	c1(c(cc(cc1)C(=O)O)O)O	Protocatechuic acid	ca	Carbonic anhydrase	7.917e-89	1
EO	c1c(c(c(cc1)O)O)O	Pyrogallol	ca	Carbonic anhydrase	4.811e-62	1
EO	c1(cc(c2c(c1)O[C@@H]([C@H](C2)O)c1cc(c(cc1)O)O)O)O	Catechin	CA1	Carbonic anhydrase 1	0.9836	1
EO	Oc1cc2c(=O)oc3c4c2c(c1O)oc(=O)c4cc(c3O)O	ellagic acid	CA1	Carbonic anhydrase 1	0.8709	1
EO	c1(cc(c2c(c1)O[C@@H]([C@@H](C2)O)c1cc(c(cc1)O)O)O)O	Epicatechin	CA1	Carbonic anhydrase 1	0.9836	1
EO	c1(c(cc(cc1O)C(=O)O)O)O	Gallic acid	CA1	Carbonic anhydrase 1	1.28e-07	1
EO	c1(c(cc(cc1)C(=O)O)O)O	Protocatechuic acid	CA1	Carbonic anhydrase 1	1.733e-12	1
EO	c1c(c(c(cc1)O)O)O	Pyrogallol	CA1	Carbonic anhydrase 1	0.3838	1
EO	c1(cc(c2c(c1)oc(c(c2=O)O)c1ccc(c(c1)O)O)O)O	Quercetin	CA1	Carbonic anhydrase 1	0.9795	1
EO	OC[C@H]1O[C@@H](Oc2c(oc3c(c2=O)c(O)cc(c3)O)c2ccc(cc2)O)[C@@H]([C@H]([C@@H]1O)O)O	Astragalin	CA12	Carbonic anhydrase 12	7.219e-13	1
EO	c1(cc(c2c(c1)O[C@@H]([C@H](C2)O)c1cc(c(cc1)O)O)O)O	Catechin	CA12	Carbonic anhydrase 12	0.0786	1
EO	Oc1cc2c(=O)oc3c4c2c(c1O)oc(=O)c4cc(c3O)O	ellagic acid	CA12	Carbonic anhydrase 12	0.03893	1
EO	c1(cc(c2c(c1)O[C@@H]([C@@H](C2)O)c1cc(c(cc1)O)O)O)O	Epicatechin	CA12	Carbonic anhydrase 12	0.0786	1
EO	c1(c(cc(cc1O)C(=O)O)O)O	Gallic acid	CA12	Carbonic anhydrase 12	1.262e-05	1
EO	c1(cc(c2c(c1)oc(c(c2=O)O)c1ccc(cc1)O)O)O	Kaempferol	CA12	Carbonic anhydrase 12	5.779e-06	0.81
EO	c1(cc(c2c(c1)oc(c(c2=O)O[C@@H]1O[C@H]([C@@H]([C@H]([C@@H]1O)O)O)C)c1ccc(cc1)O)O)O	Kaempferol 3-O-rhamnoside	CA12	Carbonic anhydrase 12	5.292e-07	0.85
EO	c1(c(cc(cc1)C(=O)O)O)O	Protocatechuic acid	CA12	Carbonic anhydrase 12	1.7e-10	1
EO	c1(cc(c2c(c1)oc(c(c2=O)O)c1ccc(c(c1)O)O)O)O	Quercetin	CA12	Carbonic anhydrase 12	1.532e-05	1
EO	c1(cc(c2c(c1)oc(c(c2=O)O[C@@H]1O[C@H]([C@@H]([C@H]([C@@H]1O)O)O)C)c1ccc(c(c1)O)O)O)O	Quercetin3-O-alpha-rhamnopyranoside	CA12	Carbonic anhydrase 12	2.283e-06	1
EO	c1(cc(c2c(c1)oc(c(c2=O)O[C@H]1[C@@H]([C@@H]([C@@H]([C@H](O1)CO)O)O)O)c1ccc(c(c1)O)O)O)O	Quercetin-3-O-glucoside	CA12	Carbonic anhydrase 12	1.456e-11	1
EO	c1(cc(c2c(c1)oc(c(c2=O)O[C@H]1[C@@H]([C@H]([C@@H]([C@H](O1)CO[C@H]1[C@H]([C@H]([C@H]([C@@H](O1)C)O)O)O)O)O)O)c1ccc(c(c1)O)O)O)O	Rutin	CA12	Carbonic anhydrase 12	8.494e-06	0.83
EO	Oc1cc2c(=O)oc3c4c2c(c1O)oc(=O)c4cc(c3O)O	ellagic acid	CA13	Carbonic anhydrase 13	1.407e-07	1
EO	c1(c(cc(cc1O)C(=O)O)O)O	Gallic acid	Ca13	Carbonic anhydrase 13	2.661e-11	1
EO	c1(cc(c2c(c1)oc(c(c2=O)O)c1ccc(cc1)O)O)O	Kaempferol	Ca13	Carbonic anhydrase 13	1.943e-06	0.78
EO	c1(cc(c2c(c1)oc(c(c2=O)O)c1ccc(c(c1)O)O)O)O	Quercetin	Ca13	Carbonic anhydrase 13	4.711e-08	1
EO	Oc1cc2c(=O)oc3c4c2c(c1O)oc(=O)c4cc(c3O)O	ellagic acid	CA14	Carbonic anhydrase 14	0.006848	1
EO	c1(c(cc(cc1O)C(=O)O)O)O	Gallic acid	CA14	Carbonic anhydrase 14	2.974e-13	1
EO	c1(c(cc(cc1)C(=O)O)O)O	Protocatechuic acid	CA14	Carbonic anhydrase 14	9.499e-20	1
EO	c1(cc(c2c(c1)oc(c(c2=O)O)c1ccc(c(c1)O)O)O)O	Quercetin	CA14	Carbonic anhydrase 14	0.02729	1
EO	c1(cc(c2c(c1)O[C@@H]([C@@H](C2)O)c1cc(c(c(c1)O)O)O)O)O	(-)-Epigallocatechin	Ca15	Carbonic anhydrase 15	5.485e-06	0.74
EO	c1(cc(c2c(c1)O[C@@H]([C@H](C2)O)c1cc(c(cc1)O)O)O)O	Catechin	Ca15	Carbonic anhydrase 15	2.296e-10	1
EO	c1(cc(c2c(c1)O[C@@H]([C@@H](C2)O)c1cc(c(cc1)O)O)O)O	Epicatechin	Ca15	Carbonic anhydrase 15	2.296e-10	1
EO	OC[C@H]1O[C@@H](Oc2c(oc3c(c2=O)c(O)cc(c3)O)c2ccc(cc2)O)[C@@H]([C@H]([C@@H]1O)O)O	Astragalin	CA2	Carbonic anhydrase 2	6.961e-06	1
EO	c1(cc(c2c(c1)O[C@@H]([C@H](C2)O)c1cc(c(cc1)O)O)O)O	Catechin	CA2	Carbonic anhydrase 2	0.9904	1
EO	Oc1cc2c(=O)oc3c4c2c(c1O)oc(=O)c4cc(c3O)O	ellagic acid	CA2	Carbonic anhydrase 2	0.9988	1
EO	c1(cc(c2c(c1)O[C@@H]([C@@H](C2)O)c1cc(c(cc1)O)O)O)O	Epicatechin	CA2	Carbonic anhydrase 2	0.9904	1
EO	c1(c(cc(cc1O)C(=O)O)O)O	Gallic acid	CA2	Carbonic anhydrase 2	9.706e-07	1
EO	c1(c(cc(cc1)C(=O)O)O)O	Protocatechuic acid	CA2	Carbonic anhydrase 2	1.886e-11	1
EO	c1c(c(c(cc1)O)O)O	Pyrogallol	CA2	Carbonic anhydrase 2	0.05666	1
EO	c1(cc(c2c(c1)oc(c(c2=O)O)c1ccc(c(c1)O)O)O)O	Quercetin	CA2	Carbonic anhydrase 2	0.08587	1
EO	c1(cc(c2c(c1)oc(c(c2=O)O[C@@H]1O[C@H]([C@@H]([C@H]([C@@H]1O)O)O)C)c1ccc(c(c1)O)O)O)O	Quercetin3-O-alpha-rhamnopyranoside	CA2	Carbonic anhydrase 2	0.0981	1
EO	c1(cc(c2c(c1)oc(c(c2=O)O[C@H]1[C@@H]([C@@H]([C@@H]([C@H](O1)CO)O)O)O)c1ccc(c(c1)O)O)O)O	Quercetin-3-O-glucoside	CA2	Carbonic anhydrase 2	4.976e-05	1
EO	c1(cc(c2c(c1)O[C@@H]([C@@H](C2)O)c1cc(c(c(c1)O)O)O)O)O	(-)-Epigallocatechin	CA3	Carbonic anhydrase 3	1.548e-06	0.74
EO	c1(cc(c2c(c1)O[C@@H]([C@H](C2)O)c1cc(c(cc1)O)O)O)O	Catechin	CA3	Carbonic anhydrase 3	2.411e-11	1
EO	c1(cc(c2c(c1)O[C@@H]([C@@H](C2)O)c1cc(c(cc1)O)O)O)O	Epicatechin	CA3	Carbonic anhydrase 3	2.411e-11	1
EO	c1(c(cc(cc1O)C(=O)O)O)O	Gallic acid	CA3	Carbonic anhydrase 3	1.854e-18	1
EO	c1(cc(c2c(c1)oc(c(c2=O)O)c1ccc(cc1)O)O)O	Kaempferol	CA3	Carbonic anhydrase 3	6.477e-07	0.78
EO	c1(cc(c2c(c1)oc(c(c2=O)O)c1ccc(c(c1)O)O)O)O	Quercetin	CA3	Carbonic anhydrase 3	1.172e-08	1
EO	OC[C@H]1O[C@@H](Oc2c(oc3c(c2=O)c(O)cc(c3)O)c2ccc(cc2)O)[C@@H]([C@H]([C@@H]1O)O)O	Astragalin	CA4	Carbonic anhydrase 4	2.45e-17	1
EO	c1(cc(c2c(c1)O[C@@H]([C@H](C2)O)c1cc(c(cc1)O)O)O)O	Catechin	CA4	Carbonic anhydrase 4	1.25e-06	1
EO	Oc1cc2c(=O)oc3c4c2c(c1O)oc(=O)c4cc(c3O)O	ellagic acid	CA4	Carbonic anhydrase 4	0.004476	1
EO	c1(cc(c2c(c1)O[C@@H]([C@@H](C2)O)c1cc(c(cc1)O)O)O)O	Epicatechin	CA4	Carbonic anhydrase 4	1.25e-06	1
EO	c1(cc(c2c(c1)O[C@@H](CC2=O)c1cc(c(cc1)O)O)O)O	Eriodictyol	CA4	Carbonic anhydrase 4	3.769e-07	0.73
EO	c1(c(cc(cc1O)C(=O)O)O)O	Gallic acid	CA4	Carbonic anhydrase 4	5.092e-06	1
EO	c1(cc(c2c(c1)oc(c(c2=O)O)c1ccc(cc1)O)O)O	Kaempferol	CA4	Carbonic anhydrase 4	5.188e-13	0.81
EO	c1(cc(c2c(c1)oc(c(c2=O)O[C@@H]1O[C@H]([C@@H]([C@H]([C@@H]1O)O)O)C)c1ccc(cc1)O)O)O	Kaempferol 3-O-rhamnoside	CA4	Carbonic anhydrase 4	1.947e-13	0.85
EO	c1(cc(c2c(c1)oc(c(c2=O)O[C@@H]1O[C@H]([C@@H]([C@H]([C@@H]1O)O)O)C)c1cc(c(c(c1)O)O)O)O)O	Myricitrin	CA4	Carbonic anhydrase 4	4.42e-12	0.81
EO	c1(c(cc(cc1)C(=O)O)O)O	Protocatechuic acid	CA4	Carbonic anhydrase 4	2.502e-07	1
EO	c1(cc(c2c(c1)oc(c(c2=O)O)c1ccc(c(c1)O)O)O)O	Quercetin	CA4	Carbonic anhydrase 4	3.475e-14	1
EO	c1(cc(c2c(c1)oc(c(c2=O)O[C@@H]1O[C@H]([C@@H]([C@H]([C@@H]1O)O)O)C)c1ccc(c(c1)O)O)O)O	Quercetin3-O-alpha-rhamnopyranoside	CA4	Carbonic anhydrase 4	1.042e-13	1
EO	c1(cc(c2c(c1)oc(c(c2=O)O[C@H]1[C@@H]([C@@H]([C@@H]([C@H](O1)CO)O)O)O)c1ccc(c(c1)O)O)O)O	Quercetin-3-O-glucoside	CA4	Carbonic anhydrase 4	3.52e-17	1
EO	c1(cc(c2c(c1)oc(c(c2=O)O[C@H]1[C@@H]([C@H]([C@@H]([C@H](O1)CO[C@H]1[C@H]([C@H]([C@H]([C@@H](O1)C)O)O)O)O)O)O)c1ccc(c(c1)O)O)O)O	Rutin	CA4	Carbonic anhydrase 4	7.75e-13	0.83
EO	c1(cc(c2c(c1)O[C@@H]([C@H](C2)O)c1cc(c(cc1)O)O)O)O	Catechin	CA5A	Carbonic anhydrase 5A, mitochondrial	7.467e-05	1
EO	Oc1cc2c(=O)oc3c4c2c(c1O)oc(=O)c4cc(c3O)O	ellagic acid	CA5A	Carbonic anhydrase 5A, mitochondrial	0.0001041	1
EO	c1(cc(c2c(c1)O[C@@H]([C@@H](C2)O)c1cc(c(cc1)O)O)O)O	Epicatechin	CA5A	Carbonic anhydrase 5A, mitochondrial	7.467e-05	1
EO	c1(c(cc(cc1O)C(=O)O)O)O	Gallic acid	CA5A	Carbonic anhydrase 5A, mitochondrial	5.412e-10	1
EO	c1(cc(c2c(c1)oc(c(c2=O)O)c1ccc(c(c1)O)O)O)O	Quercetin	CA5A	Carbonic anhydrase 5A, mitochondrial	0.0009832	1
EO	c1(cc(c2c(c1)O[C@@H]([C@H](C2)O)c1cc(c(cc1)O)O)O)O	Catechin	CA5B	Carbonic anhydrase 5B, mitochondrial	1.06e-05	1
EO	c1(cc(c2c(c1)O[C@@H]([C@@H](C2)O)c1cc(c(cc1)O)O)O)O	Epicatechin	CA5B	Carbonic anhydrase 5B, mitochondrial	1.06e-05	1
EO	c1(c(cc(cc1O)C(=O)O)O)O	Gallic acid	CA5B	Carbonic anhydrase 5B, mitochondrial	1.253e-08	1
EO	c1(cc(c2c(c1)O[C@@H]([C@H](C2)O)c1cc(c(cc1)O)O)O)O	Catechin	CA6	Carbonic anhydrase 6	1.609e-05	1
EO	Oc1cc2c(=O)oc3c4c2c(c1O)oc(=O)c4cc(c3O)O	ellagic acid	CA6	Carbonic anhydrase 6	2.351e-05	1
EO	c1(cc(c2c(c1)O[C@@H]([C@@H](C2)O)c1cc(c(cc1)O)O)O)O	Epicatechin	CA6	Carbonic anhydrase 6	1.609e-05	1
EO	c1(c(cc(cc1O)C(=O)O)O)O	Gallic acid	CA6	Carbonic anhydrase 6	2.22e-16	1
EO	c1(c(cc(cc1)C(=O)O)O)O	Protocatechuic acid	CA6	Carbonic anhydrase 6	2.887e-17	1
EO	c1c(c(c(cc1)O)O)O	Pyrogallol	CA6	Carbonic anhydrase 6	1.23e-06	1
EO	c1(cc(c2c(c1)oc(c(c2=O)O)c1ccc(c(c1)O)O)O)O	Quercetin	CA6	Carbonic anhydrase 6	0.0003039	1
EO	OC[C@H]1O[C@@H](Oc2c(oc3c(c2=O)c(O)cc(c3)O)c2ccc(cc2)O)[C@@H]([C@H]([C@@H]1O)O)O	Astragalin	CA7	Carbonic anhydrase 7	3.331e-16	1
EO	c1(cc(c2c(c1)O[C@@H]([C@H](C2)O)c1cc(c(cc1)O)O)O)O	Catechin	CA7	Carbonic anhydrase 7	2.656e-05	1
EO	Oc1cc2c(=O)oc3c4c2c(c1O)oc(=O)c4cc(c3O)O	ellagic acid	CA7	Carbonic anhydrase 7	0.00019	1
EO	c1(cc(c2c(c1)O[C@@H]([C@@H](C2)O)c1cc(c(cc1)O)O)O)O	Epicatechin	CA7	Carbonic anhydrase 7	2.656e-05	1
EO	c1(c(cc(cc1O)C(=O)O)O)O	Gallic acid	CA7	Carbonic anhydrase 7	3.362e-10	1
EO	c1(cc(c2c(c1)oc(c(c2=O)O)c1ccc(cc1)O)O)O	Kaempferol	CA7	Carbonic anhydrase 7	1.882e-10	0.81
EO	c1(cc(c2c(c1)oc(c(c2=O)O[C@@H]1O[C@H]([C@@H]([C@H]([C@@H]1O)O)O)C)c1ccc(cc1)O)O)O	Kaempferol 3-O-rhamnoside	CA7	Carbonic anhydrase 7	1.98e-12	0.85
EO	c1(cc(c2c(c1)oc(c(c2=O)O[C@@H]1O[C@H]([C@@H]([C@H]([C@@H]1O)O)O)C)c1cc(c(c(c1)O)O)O)O)O	Myricitrin	CA7	Carbonic anhydrase 7	8.498e-11	0.81
EO	c1(c(cc(cc1)C(=O)O)O)O	Protocatechuic acid	CA7	Carbonic anhydrase 7	2.143e-14	1
EO	c1(cc(c2c(c1)oc(c(c2=O)O)c1ccc(c(c1)O)O)O)O	Quercetin	CA7	Carbonic anhydrase 7	2.122e-11	1
EO	c1(cc(c2c(c1)oc(c(c2=O)O[C@@H]1O[C@H]([C@@H]([C@H]([C@@H]1O)O)O)C)c1ccc(c(c1)O)O)O)O	Quercetin3-O-alpha-rhamnopyranoside	CA7	Carbonic anhydrase 7	4.117e-12	1
EO	c1(cc(c2c(c1)oc(c(c2=O)O[C@H]1[C@@H]([C@@H]([C@@H]([C@H](O1)CO)O)O)O)c1ccc(c(c1)O)O)O)O	Quercetin-3-O-glucoside	CA7	Carbonic anhydrase 7	4.441e-16	1
EO	c1(cc(c2c(c1)oc(c(c2=O)O[C@H]1[C@@H]([C@H]([C@@H]([C@H](O1)CO[C@H]1[C@H]([C@H]([C@H]([C@@H](O1)C)O)O)O)O)O)O)c1ccc(c(c1)O)O)O)O	Rutin	CA7	Carbonic anhydrase 7	1.661e-11	0.83
EO	c1(cc(c2c(c1)O[C@@H]([C@H](C2)O)c1cc(c(cc1)O)O)O)O	Catechin	CA9	Carbonic anhydrase 9	0.9643	1
EO	Oc1cc2c(=O)oc3c4c2c(c1O)oc(=O)c4cc(c3O)O	ellagic acid	CA9	Carbonic anhydrase 9	0.1987	1
EO	c1(cc(c2c(c1)O[C@@H]([C@@H](C2)O)c1cc(c(cc1)O)O)O)O	Epicatechin	CA9	Carbonic anhydrase 9	0.9643	1
EO	c1(c(cc(cc1O)C(=O)O)O)O	Gallic acid	CA9	Carbonic anhydrase 9	0.0001488	1
EO	c1(c(cc(cc1)C(=O)O)O)O	Protocatechuic acid	CA9	Carbonic anhydrase 9	3.17e-09	1
EO	c1(cc(c2c(c1)oc(c(c2=O)O)c1ccc(c(c1)O)O)O)O	Quercetin	CA9	Carbonic anhydrase 9	0.2708	1
EO	c1(cc(c2c(c1)oc(c(c2=O)O)c1ccc(c(c1)O)O)O)O	Quercetin	CAMK2B	Calcium/calmodulin-dependent protein kinase type II subunit beta	0.0002684	1
EO	c1(cc(c2c(c1)oc(c(c2=O)O[C@@H]1O[C@H]([C@@H]([C@H]([C@@H]1O)O)O)C)c1ccc(cc1)O)O)O	Kaempferol 3-O-rhamnoside	CBS	Cystathionine beta-synthase	2.325e-44	0.64
EO	Oc1cc2c(=O)oc3c4c2c(c1O)oc(=O)c4cc(c3O)O	ellagic acid	CCNA1	Cyclin-A1	0.003442	1
EO	Oc1cc2c(=O)oc3c4c2c(c1O)oc(=O)c4cc(c3O)O	ellagic acid	CCNA2	Cyclin-A2	0.09404	1
EO	Oc1cc2c(=O)oc3c4c2c(c1O)oc(=O)c4cc(c3O)O	ellagic acid	CCND1	G1/S-specific cyclin-D1	0.005419	1
EO	c1(cc(c2c(c1)oc(c(c2=O)O)c1ccc(cc1)O)O)O	Kaempferol	CCR4	C-C chemokine receptor type 4	2.259e-13	0.78
EO	c1(cc(c2c(c1)oc(c(c2=O)O)c1ccc(c(c1)O)O)O)O	Quercetin	CCR4	C-C chemokine receptor type 4	7.329e-13	1
EO	O=C[C@]12CC[C@@]3(C(=CC[C@H]4[C@@]3(C)CC[C@@H]3[C@]4(C)CC[C@@H](C3(C)C)O)[C@@H]2CC(CC1)(C)C)C	Oleanolic aldehyde	CD81	CD81 antigen	1.014e-81	0.66
EO	c1(cc(c2c(c1)oc(c(c2=O)O)c1ccc(c(c1)O)O)O)O	Quercetin	CDK1	Cyclin-dependent kinase 1	0.005973	1
EO	Oc1cc2c(=O)oc3c4c2c(c1O)oc(=O)c4cc(c3O)O	ellagic acid	CDK2	Cyclin-dependent kinase 2	0.9625	1
EO	Oc1cc2c(=O)oc3c4c2c(c1O)oc(=O)c4cc(c3O)O	ellagic acid	CDK4	Cyclin-dependent kinase 4	0.389	1
EO	O=C[C@]12CC[C@@]3(C(=CC[C@H]4[C@@]3(C)CC[C@@H]3[C@]4(C)CC[C@@H](C3(C)C)O)[C@@H]2CC(CC1)(C)C)C	Oleanolic aldehyde	CES2	Cocaine esterase	7.772e-16	0.62
EO	C/C(=CC=CC=C(C=CC=C(C=CC1=C(C)CCCC1(C)C)/C)/C)/C=C/C=C(/C=C/C1=C(C)CCCC1(C)C)C	beta-carotene	CRABP1	Cellular retinoic acid-binding protein 1	2.27e-73	0.8
EO	CCC(CCC(C)C1CCC2C1(CCC3C2CC=C4C3(CCC(C4)O)C)C)C(C)C	Phytosterols	CRYAB	Alpha-crystallin B chain	3.773e-56	0.7
EO	Oc1cc2c(=O)oc3c4c2c(c1O)oc(=O)c4cc(c3O)O	ellagic acid	Csnk2a1	Casein kinase II subunit alpha	4.629e-39	1
EO	Oc1cc2c(=O)oc3c4c2c(c1O)oc(=O)c4cc(c3O)O	ellagic acid	CSNK2A1	Casein kinase II subunit alpha	0.1177	1
EO	c1(cc(c2c(c1)oc(c(c2=O)O)c1ccc(c(c1)O)O)O)O	Quercetin	CSNK2A1	Casein kinase II subunit alpha	0.007685	1
EO	Oc1cc2c(=O)oc3c4c2c(c1O)oc(=O)c4cc(c3O)O	ellagic acid	Csnk2b	Casein kinase II subunit beta	4.629e-39	1
EO	c1(cc(c2c(c1)oc(c(c2=O)O)c1ccc(c(c1)O)O)O)O	Quercetin	CXCR1	C-X-C chemokine receptor type 1	0.001074	1
EO	CCC(CCC(C)C1CCC2C1(CCC3C2CC=C4C3(CCC(C4)O)C)C)C(C)C	Phytosterols	cyp125	Steroid C26-monooxygenase	1.954e-57	0.72
EO	CCC(CCC(C)C1CCC2C1(CCC3C2CC=C4C3(CCC(C4)O)C)C)C(C)C	Phytosterols	CYP17A1	Steroid 17-alpha-hydroxylase/17,20 lyase	4.865e-83	0.68
EO	c1(cc(c2c(c1)O[C@@H](CC2=O)c1ccc(c(c1)O)O)O)O[C@H]1[C@@H]([C@H]([C@@H]([C@H](O1)CO)O)O)O	(2S)-Eriodictyol 7-O-beta-D-glucopyranoside	CYP19A1	Aromatase	1.462e-07	0.7
EO	c1(cc(c2c(c1)O[C@@H](CC2=O)c1cc(c(cc1)O)O)O)O	Eriodictyol	CYP19A1	Aromatase	1.68e-10	0.73
EO	c1(cc(c2c(c1)O[C@@H](CC2=O)c1ccc(cc1)O)O)O	Naringenin	CYP19A1	Aromatase	1.529e-12	0.82
EO	c1(cc(c2c(c1)O[C@@H](CC2=O)c1ccc(cc1)O)O)O[C@H]1[C@@H]([C@H]([C@H]([C@H](O1)CO)O)O)O	Naringenin 7-O-beta-D-glucoside	CYP19A1	Aromatase	2.491e-08	0.8
EO	c1(cc(c2c(c1)oc(c(c2=O)O)c1ccc(cc1)O)O)O	Kaempferol	CYP1A1	Cytochrome P450 1A1	1.323e-11	0.78
EO	c1(cc(c2c(c1)oc(c(c2=O)O)c1ccc(c(c1)O)O)O)O	Quercetin	CYP1A1	Cytochrome P450 1A1	6.82e-11	1
EO	c1(cc(c2c(c1)oc(c(c2=O)O)c1ccc(c(c1)O)O)O)O	Quercetin	CYP1A2	Cytochrome P450 1A2	0.09505	1
EO	OC[C@H]([C@H]([C@H](Cn1c2cc(C)c(cc2nc2c1nc(=O)[nH]c2=O)C)O)O)O	riboflavin	CYP1A2	Cytochrome P450 1A2	0.9994	1
EO	c1(cc(c2c(c1)O[C@@H](CC2=O)c1cc(c(cc1)O)O)O)O	Eriodictyol	CYP1B1	Cytochrome P450 1B1	1.059e-17	0.73
EO	c1(cc(c2c(c1)oc(c(c2=O)O)c1ccc(cc1)O)O)O	Kaempferol	CYP1B1	Cytochrome P450 1B1	4.491e-50	0.81
EO	c1(cc(c2c(c1)O[C@@H](CC2=O)c1ccc(cc1)O)O)O	Naringenin	CYP1B1	Cytochrome P450 1B1	2.22e-16	0.82
EO	c1(cc(c2c(c1)oc(c(c2=O)O)c1ccc(c(c1)O)O)O)O	Quercetin	CYP1B1	Cytochrome P450 1B1	1.358e-45	1
EO	c1(cc(c2c(c1)oc(c(c2=O)O)c1ccc(cc1)O)O)O	Kaempferol	CYP2C8	Cytochrome P450 2C8	3.205e-17	0.78
EO	c1(cc(c2c(c1)oc(c(c2=O)O)c1ccc(c(c1)O)O)O)O	Quercetin	CYP2C8	Cytochrome P450 2C8	9.163e-22	1
EO	c1(cc(c2c(c1)oc(c(c2=O)O)c1ccc(c(c1)O)O)O)O	Quercetin	CYP2C9	Cytochrome P450 2C9	0.5125	1
EO	c1(cc(c2c(c1)oc(c(c2=O)O)c1ccc(cc1)O)O)O	Kaempferol	DAPK1	Death-associated protein kinase 1	6.256e-20	0.78
EO	c1(cc(c2c(c1)oc(c(c2=O)O)c1ccc(c(c1)O)O)O)O	Quercetin	DAPK1	Death-associated protein kinase 1	1.344e-21	1
EO	OC(=O)C(CCCN=C(N)N)N	DL-Arginine	DDAH1	N(G),N(G)-dimethylarginine dimethylaminohydrolase 1	1.11e-16	0.62
EO	c1(cc(c2c(c1)oc(c(c2=O)O)c1ccc(cc1)O)O)O	Kaempferol	ddl	D-alanine--D-alanine ligase	1.375e-97	0.78
EO	c1(cc(c2c(c1)oc(c(c2=O)O)c1ccc(c(c1)O)O)O)O	Quercetin	ddl	D-alanine--D-alanine ligase	2.9e-124	1
EO	OC(=O)Cc1c[nH]c2c1cccc165	Indole-3-acetic acid	def	Peptide deformylase	2.62e-13	0.65
EO	CCC(CCC(C)C1CCC2C1(CCC3C2CC=C4C3(CCC(C4)O)C)C)C(C)C	Phytosterols	DHCR24	Delta(24)-sterol reductase	7.597e-103	0.73
EO	CCC(CCC(C)C1CCC2C1(CCC3C2CC=C4C3(CCC(C4)O)C)C)C(C)C	Phytosterols	Dhcr7	7-dehydrocholesterol reductase	1.189e-55	0.73
EO	c1(cc(c2c(c1)O[C@@H]([C@@H](C2)OC(=O)c1cc(c(c(c1)O)O)O)c1cc(c(c(c1)O)O)O)O)O	Epigallocatechin gallate	DNMT1	DNA (cytosine-5)-methyltransferase 1	0.0001402	1
EO	c1(c(cc(cc1O)C(=O)O)O)O	Gallic acid	DPP4	Dipeptidyl peptidase 4	0.8551	1
EO	c1(cc(c2c(c1)oc(c(c2=O)O)c1ccc(c(c1)O)O)O)O	Quercetin	DPP4	Dipeptidyl peptidase 4	0.4105	1
EO	c1(cc(c2c(c1)oc(c(c2=O)O)c1ccc(c(c1)O)O)O)O	Quercetin	DRD4	D(4) dopamine receptor	0.8162	1
EO	OC[C@H]1O[C@@H](Oc2c(oc3c(c2=O)c(O)cc(c3)O)c2ccc(cc2)O)[C@@H]([C@H]([C@@H]1O)O)O	Astragalin	Dyrk1a	Dual specificity tyrosine-phosphorylation-regulated kinase 1A	6.133e-11	1
EO	c1(cc(c2c(c1)O[C@@H]([C@@H](C2)OC(=O)c1cc(c(c(c1)O)O)O)c1cc(c(c(c1)O)O)O)O)O	Epigallocatechin gallate	Dyrk1a	Dual specificity tyrosine-phosphorylation-regulated kinase 1A	0.06656	1
EO	c1(cc(c2c(c1)O[C@@H]([C@@H](C2)OC(=O)c1cc(c(c(c1)O)O)O)c1cc(c(c(c1)O)O)O)O)O	Epigallocatechin gallate	DYRK1A	Dual specificity tyrosine-phosphorylation-regulated kinase 1A	0.2146	1
EO	c1(cc(c2c(c1)oc(c(c2=O)O)c1ccc(cc1)O)O)O	Kaempferol	Dyrk1a	Dual specificity tyrosine-phosphorylation-regulated kinase 1A	1.746e-11	0.68
EO	c1(cc(c2c(c1)oc(c(c2=O)O[C@@H]1O[C@H]([C@@H]([C@H]([C@@H]1O)O)O)C)c1ccc(cc1)O)O)O	Kaempferol 3-O-rhamnoside	Dyrk1a	Dual specificity tyrosine-phosphorylation-regulated kinase 1A	1.123e-10	0.83
EO	c1(cc(c2c(c1)oc(c(c2=O)O[C@@H]1O[C@H]([C@@H]([C@H]([C@@H]1O)O)O)C)c1cc(c(c(c1)O)O)O)O)O	Myricitrin	Dyrk1a	Dual specificity tyrosine-phosphorylation-regulated kinase 1A	1.277e-08	0.69
EO	c1(cc(c2c(c1)oc(c(c2=O)O)c1ccc(c(c1)O)O)O)O	Quercetin	Dyrk1a	Dual specificity tyrosine-phosphorylation-regulated kinase 1A	2.431e-08	0.66
EO	c1(cc(c2c(c1)oc(c(c2=O)O[C@@H]1O[C@H]([C@@H]([C@H]([C@@H]1O)O)O)C)c1ccc(c(c1)O)O)O)O	Quercetin3-O-alpha-rhamnopyranoside	Dyrk1a	Dual specificity tyrosine-phosphorylation-regulated kinase 1A	5.761e-10	0.83
EO	c1(cc(c2c(c1)oc(c(c2=O)O[C@H]1[C@@H]([C@@H]([C@@H]([C@H](O1)CO)O)O)O)c1ccc(c(c1)O)O)O)O	Quercetin-3-O-glucoside	Dyrk1a	Dual specificity tyrosine-phosphorylation-regulated kinase 1A	3.449e-10	1
EO	c1(cc(c2c(c1)oc(c(c2=O)O[C@H]1[C@@H]([C@H]([C@@H]([C@H](O1)CO[C@H]1[C@H]([C@H]([C@H]([C@@H](O1)C)O)O)O)O)O)O)c1ccc(c(c1)O)O)O)O	Rutin	Dyrk1a	Dual specificity tyrosine-phosphorylation-regulated kinase 1A	7.611e-10	1
EO	c1(cc(c2c(c1)oc(c(c2=O)O)c1ccc(cc1)O)O)O	Kaempferol	E6	Protein E6	1.656e-118	0.75
EO	c1(cc(c2c(c1)oc(c(c2=O)O)c1ccc(c(c1)O)O)O)O	Quercetin	E6	Protein E6	1.679e-112	0.76
EO	Oc1cc2c(=O)oc3c4c2c(c1O)oc(=O)c4cc(c3O)O	ellagic acid	EGFR	Epidermal growth factor receptor	0.9998	1
EO	c1c(c(c(cc1)O)O)O	Pyrogallol	EGFR	Epidermal growth factor receptor	0.9999	1
EO	c1(cc(c2c(c1)oc(c(c2=O)O)c1ccc(c(c1)O)O)O)O	Quercetin	EGFR	Epidermal growth factor receptor	0.9429	1
EO	c1(cc(c2c(c1)oc(c(c2=O)O)c1ccc(cc1)O)O)O	Kaempferol	ELAVL1	ELAV-like protein 1	2.254e-14	0.78
EO	c1(cc(c2c(c1)oc(c(c2=O)O)c1ccc(c(c1)O)O)O)O	Quercetin	ELAVL1	ELAV-like protein 1	3.874e-18	1
EO	c1(cc(c2c(c1)O[C@@H]([C@H](C2)O)c1cc(c(cc1)O)O)O)O	Catechin	ELAVL3	ELAV-like protein 3	1.307e-37	0.6
EO	Oc1cc2c(=O)oc3c4c2c(c1O)oc(=O)c4cc(c3O)O	ellagic acid	ELAVL3	ELAV-like protein 3	3.447e-51	1
EO	c1(cc(c2c(c1)O[C@@H]([C@@H](C2)O)c1cc(c(cc1)O)O)O)O	Epicatechin	ELAVL3	ELAV-like protein 3	1.307e-37	0.6
EO	c1(cc(c2c(c1)O[C@@H]([C@@H](C2)OC(=O)c1cc(c(c(c1)O)O)O)c1cc(c(c(c1)O)O)O)O)O	Epigallocatechin gallate	ELAVL3	ELAV-like protein 3	1.205e-63	0.85
EO	c1(cc(c2c(c1)oc(c(c2=O)O)c1ccc(cc1)O)O)O	Kaempferol	ELAVL3	ELAV-like protein 3	1.407e-81	0.78
EO	c1(cc(c2c(c1)oc(c(c2=O)O)c1ccc(c(c1)O)O)O)O	Quercetin	ELAVL3	ELAV-like protein 3	3.073e-96	1
EO	Oc1cc2c(=O)oc3c4c2c(c1O)oc(=O)c4cc(c3O)O	ellagic acid	EPHB4	Ephrin type-B receptor 4	0.09366	1
EO	Oc1cc2c(=O)oc3c4c2c(c1O)oc(=O)c4cc(c3O)O	ellagic acid	ERBB2	Receptor tyrosine-protein kinase erbB-2	0.7112	1
EO	c1(cc(c2c(c1)O[C@@H](CC2=O)c1ccc(cc1)O)O)O	Naringenin	ESR1	Estrogen receptor	4.378e-17	0.63
EO	c1(cc(c2c(c1)O[C@@H](CC2=O)c1ccc(cc1)O)O)O	Naringenin	ESR2	Estrogen receptor beta	2.212e-21	0.63
EO	c1(cc2c(c(c1O)O)c1c(cc(c(c1O)O)O)C(=O)OC[C@H]1O[C@H]([C@@H]([C@H]([C@H]1O)OC2=O)O)OC(=O)c1cc(c(c(c1)O)O)O)O	Corilagin	F2	Prothrombin	3.055e-06	0.77
EO	CCC(CCC(C)C1CCC2C1(CCC3C2CC=C4C3(CCC(C4)O)C)C)C(C)C	Phytosterols	F2	Prothrombin	0.9968	1
EO	c1(cc(c2c(c1)oc(c(c2=O)O)c1ccc(c(c1)O)O)O)O	Quercetin	F2	Prothrombin	0.9968	1
EO	O=C[C@]12CC[C@@]3(C(=CC[C@H]4[C@@]3(C)CC[C@@H]3[C@]4(C)CC[C@@H](C3(C)C)O)[C@@H]2CC(CC1)(C)C)C	Oleanolic aldehyde	F3	Tissue factor	9.302e-19	0.71
EO	c1(cc(c2c(c1)O[C@@H]([C@@H](C2)O)c1cc(c(c(c1)O)O)O)O)O	(-)-Epigallocatechin	fabG	3-oxoacyl-acyl-carrier protein reductase	2.242e-68	0.62
EO	c1(cc(c2c(c1)O[C@@H]([C@H](C2)O)c1cc(c(cc1)O)O)O)O	Catechin	fabG	3-oxoacyl-acyl-carrier protein reductase	4.388e-72	0.6
EO	c1(cc(c2c(c1)O[C@@H]([C@@H](C2)O)c1cc(c(cc1)O)O)O)O	Epicatechin	fabG	3-oxoacyl-acyl-carrier protein reductase	4.388e-72	0.6
EO	c1(cc(c2c(c1)O[C@@H]([C@@H](C2)OC(=O)c1cc(c(c(c1)O)O)O)c1cc(c(c(c1)O)O)O)O)O	Epigallocatechin gallate	fabG	3-oxoacyl-acyl-carrier protein reductase	1.999e-109	1
EO	c1(cc(c2c(c1)oc(c(c2=O)O)c1ccc(cc1)O)O)O	Kaempferol	fabG	3-oxoacyl-acyl-carrier protein reductase	1.364e-79	0.78
EO	c1(cc(c2c(c1)oc(c(c2=O)O)c1ccc(c(c1)O)O)O)O	Quercetin	fabG	3-oxoacyl-acyl-carrier protein reductase	2.562e-88	1
EO	c12c([C@@H]([C@H]([C@H](O1)c1cc(c(c(c1)O)O)O)O)c1c3c(C[C@H]([C@H](O3)c3cc(c(c(c3)O)O)O)O)c(cc1O)O)c(cc(c2)O)O	(-)-Epicatechin 3-O-gallate	fabI	Enoyl-acyl-carrier protein reductase	1.11e-16	0.65
EO	c1(cc(c2c(c1)O[C@@H]([C@@H](C2)O)c1cc(c(c(c1)O)O)O)O)O	(-)-Epigallocatechin	fabI	Enoyl-acyl-carrier protein reductase	1.461e-22	1
EO	c1(cc(c2c(c1)O[C@@H]([C@H](C2)O)c1cc(c(cc1)O)O)O)O	Catechin	fabI	Enoyl-acyl-carrier protein reductase	1.191e-21	0.74
EO	c1(cc(c2c(c1)O[C@@H]([C@H](C2)O)c1cc(c(cc1)O)O)O)O	Catechin	fabI	Enoyl-[acyl-carrier-protein] reductase [NADH] FabI	7.101e-07	0.6
EO	c1(cc(c2c(c1)O[C@@H]([C@@H](C2)O)c1cc(c(cc1)O)O)O)O	Epicatechin	fabI	Enoyl-acyl-carrier protein reductase	1.191e-21	0.74
EO	c1(cc(c2c(c1)O[C@@H]([C@@H](C2)O)c1cc(c(cc1)O)O)O)O	Epicatechin	fabI	Enoyl-[acyl-carrier-protein] reductase [NADH] FabI	7.101e-07	0.6
EO	c1(cc(c2c(c1)O[C@@H]([C@@H](C2)OC(=O)c1cc(c(c(c1)O)O)O)c1cc(c(c(c1)O)O)O)O)O	Epigallocatechin gallate	fabI	Enoyl-acyl-carrier protein reductase	2.306e-29	1
EO	c1(cc(c2c(c1)O[C@@H]([C@@H](C2)OC(=O)c1cc(c(c(c1)O)O)O)c1cc(c(c(c1)O)O)O)O)O	Epigallocatechin gallate	fabI	Enoyl-[acyl-carrier-protein] reductase [NADH] FabI	1.308e-06	0.85
EO	c1(cc(c2c(c1)oc(c(c2=O)O)c1ccc(cc1)O)O)O	Kaempferol	fabI	Enoyl-acyl-carrier protein reductase	6.232e-27	0.78
EO	c12c([C@@H]([C@H]([C@H](O1)c1cc(c(c(c1)O)O)O)O)c1c3c(C[C@H]([C@H](O3)c3cc(c(c(c3)O)O)O)O)c(cc1O)O)c(cc(c2)O)O	Prodelphinidin B1	fabI	Enoyl-acyl-carrier protein reductase	1.11e-16	0.65
EO	c12c([C@@H]([C@H]([C@H](O1)c1cc(c(c(c1)O)O)O)O)c1c3c(C[C@H]([C@@H](O3)c3cc(c(c(c3)O)O)O)O)c(cc1O)O)c(cc(c2)O)O	Prodelphinidin B2	fabI	Enoyl-acyl-carrier protein reductase	1.11e-16	0.65
EO	c1(cc(c2c(c1)oc(c(c2=O)O)c1ccc(c(c1)O)O)O)O	Quercetin	fabI	Enoyl-acyl-carrier protein reductase	2.301e-28	1
EO	c1(cc(c2c(c1)O[C@@H]([C@@H](C2)O)c1cc(c(c(c1)O)O)O)O)O	(-)-Epigallocatechin	fabZ	Beta-hydroxyacyl-ACP dehydratase	9.041e-57	0.62
EO	c1(cc(c2c(c1)O[C@@H]([C@H](C2)O)c1cc(c(cc1)O)O)O)O	Catechin	fabZ	Beta-hydroxyacyl-ACP dehydratase	7.647e-60	0.6
EO	c1(cc(c2c(c1)O[C@@H]([C@@H](C2)O)c1cc(c(cc1)O)O)O)O	Epicatechin	fabZ	Beta-hydroxyacyl-ACP dehydratase	7.647e-60	0.6
EO	c1(cc(c2c(c1)O[C@@H]([C@@H](C2)OC(=O)c1cc(c(c(c1)O)O)O)c1cc(c(c(c1)O)O)O)O)O	Epigallocatechin gallate	fabZ	Beta-hydroxyacyl-ACP dehydratase	8.766e-91	1
EO	c1(cc(c2c(c1)oc(c(c2=O)O)c1ccc(cc1)O)O)O	Kaempferol	fabZ	Beta-hydroxyacyl-ACP dehydratase	7.496e-99	0.78
EO	c1(cc(c2c(c1)oc(c(c2=O)O)c1ccc(c(c1)O)O)O)O	Quercetin	fabZ	Beta-hydroxyacyl-ACP dehydratase	1.593e-95	1
EO	OC[C@H]1O[C@@H](Oc2c(oc3c(c2=O)c(O)cc(c3)O)c2ccc(cc2)O)[C@@H]([C@H]([C@@H]1O)O)O	Astragalin	FASN	Fatty acid synthase	4.479e-104	0.84
EO	c1(cc(c2c(c1)oc(c(c2=O)O[C@@H]1O[C@H]([C@@H]([C@H]([C@@H]1O)O)O)C)c1ccc(cc1)O)O)O	Kaempferol 3-O-rhamnoside	FASN	Fatty acid synthase	9.578e-78	0.62
EO	c1(cc(c2c(c1)oc(c(c2=O)O[C@@H]1O[C@H]([C@@H]([C@H]([C@@H]1O)O)O)C)c1cc(c(c(c1)O)O)O)O)O	Myricitrin	FASN	Fatty acid synthase	1.625e-74	0.6
EO	c1(cc(c2c(c1)oc(c(c2=O)O[C@@H]1O[C@H]([C@@H]([C@H]([C@@H]1O)O)O)C)c1ccc(c(c1)O)O)O)O	Quercetin3-O-alpha-rhamnopyranoside	FASN	Fatty acid synthase	2.344e-92	0.74
EO	c1(cc(c2c(c1)oc(c(c2=O)O[C@H]1[C@@H]([C@@H]([C@@H]([C@H](O1)CO)O)O)O)c1ccc(c(c1)O)O)O)O	Quercetin-3-O-glucoside	FASN	Fatty acid synthase	6.839e-122	0.98
EO	c1(cc(c2c(c1)oc(c(c2=O)O[C@H]1[C@@H]([C@H]([C@@H]([C@H](O1)CO[C@H]1[C@H]([C@H]([C@H]([C@@H](O1)C)O)O)O)O)O)O)c1ccc(c(c1)O)O)O)O	Rutin	FASN	Fatty acid synthase	1.715e-91	0.73
EO	Oc1cc2c(=O)oc3c4c2c(c1O)oc(=O)c4cc(c3O)O	ellagic acid	Fgr	Tyrosine-protein kinase Fgr	2.9e-124	1
EO	OC[C@H]1OC(O)[C@@H]([C@H]([C@@H]1O)O)O	D-Glucose	fimH	Type 1 fimbrin D-mannose specific adhesin	1.69e-98	1
EO	c1(cc(c2c(c1)oc(c(c2=O)O)c1ccc(c(c1)O)O)O)O	Quercetin	FLT3	Receptor-type tyrosine-protein kinase FLT3	0.01269	1
EO	Oc1cc2c(=O)oc3c4c2c(c1O)oc(=O)c4cc(c3O)O	ellagic acid	FLT4	Vascular endothelial growth factor receptor 3	0.05918	1
EO	OC(=O)C(CCCN=C(N)N)N	DL-Arginine	FURIN	Furin	8.051e-07	0.61
EO	c1(cc(c2c(c1)O[C@@H]([C@@H](C2)O)c1cc(c(c(c1)O)O)O)O)O	(-)-Epigallocatechin	FUT4	Alpha-(1,3)-fucosyltransferase 4	1.178e-77	0.62
EO	c1(cc(c2c(c1)O[C@@H]([C@@H](C2)OC(=O)c1cc(c(c(c1)O)O)O)c1cc(c(c(c1)O)O)O)O)O	Epigallocatechin gallate	FUT4	Alpha-(1,3)-fucosyltransferase 4	2.9e-124	1
EO	c1(cc(c2c(c1)O[C@@H]([C@@H](C2)O)c1cc(c(c(c1)O)O)O)O)O	(-)-Epigallocatechin	FUT7	Alpha-(1,3)-fucosyltransferase 7	1.239e-27	0.62
EO	c1(cc(c2c(c1)O[C@@H]([C@@H](C2)OC(=O)c1cc(c(c(c1)O)O)O)c1cc(c(c(c1)O)O)O)O)O	Epigallocatechin gallate	FUT7	Alpha-(1,3)-fucosyltransferase 7	2.388e-71	1
EO	c1(c(cc(cc1O)C(=O)O)O)O	Gallic acid	FUT7	Alpha-(1,3)-fucosyltransferase 7	9.099e-79	1
EO	c1c(c(c(cc1)O)O)O	Pyrogallol	FYN	Tyrosine-protein kinase Fyn	0.01089	1
EO	c1(cc(c2c(c1)oc(c(c2=O)O)c1ccc(cc1)O)O)O	Kaempferol	GLO1	Lactoylglutathione lyase	1.132e-20	0.78
EO	c1(cc(c2c(c1)oc(c(c2=O)O)c1ccc(c(c1)O)O)O)O	Quercetin	GLO1	Lactoylglutathione lyase	4.545e-24	1
EO	CC(=C)C1CCC2(C1C3CCC4C5(CCC(C(C5CCC4(C3(CC2)C)C)(C)C)O)C)C	3beta-Hydroxy-20(29)-lupene	GPBAR1	G-protein coupled bile acid receptor 1	1.552e-17	0.72
EO	C1[C@@H](C([C@H]2[C@](C1)([C@@H]1[C@@](CC2)([C@]2([C@H](CC1)[C@@H]1[C@](CC2)(C)CC[C@H]1C(=C)C)C)C)C)(C)C)O	Lupeol	GPBAR1	G-protein coupled bile acid receptor 1	1.552e-17	0.72
EO	O=C[C@]12CC[C@@]3(C(=CC[C@H]4[C@@]3(C)CC[C@@H]3[C@]4(C)CC[C@@H](C3(C)C)O)[C@@H]2CC(CC1)(C)C)C	Oleanolic aldehyde	GPBAR1	G-protein coupled bile acid receptor 1	2.164e-06	0.71
EO	Oc1cc2c(=O)oc3c4c2c(c1O)oc(=O)c4cc(c3O)O	ellagic acid	GPR35	G-protein coupled receptor 35	6.432e-10	1
EO	c1(cc(c2c(c1)oc(c(c2=O)O)c1ccc(cc1)O)O)O	Kaempferol	GPR35	G-protein coupled receptor 35	8.369e-10	0.78
EO	c1(cc(c2c(c1)oc(c(c2=O)O)c1ccc(c(c1)O)O)O)O	Quercetin	GPR35	G-protein coupled receptor 35	1.105e-10	1
EO	OC(=O)Cc1c[nH]c2c1cccc115	Indole-3-acetic acid	GPR84	G-protein coupled receptor 84	2.177e-21	0.64
EO	Oc1cc2c(=O)oc3c4c2c(c1O)oc(=O)c4cc(c3O)O	ellagic acid	GSK3B	Glycogen synthase kinase-3 beta	0.925	1
EO	c1(cc(c2c(c1)oc(c(c2=O)O)c1ccc(c(c1)O)O)O)O	Quercetin	GSK3B	Glycogen synthase kinase-3 beta	0.1593	1
EO	c1(cc(c2c(c1)oc(c(c2=O)O)c1ccc(cc1)O)O)O	Kaempferol	HSD17B2	Estradiol 17-beta-dehydrogenase 2	5.119e-06	0.78
EO	c1(cc(c2c(c1)oc(c(c2=O)O)c1ccc(c(c1)O)O)O)O	Quercetin	HSD17B2	Estradiol 17-beta-dehydrogenase 2	6.112e-07	1
EO	Oc1cc2c(=O)oc3c4c2c(c1O)oc(=O)c4cc(c3O)O	ellagic acid	HSPA1A	Heat shock 70 kDa protein 1A	9.774e-19	1
EO	c1(cc(c2c(c1)O[C@@H]([C@@H](C2)O)c1cc(c(c(c1)O)O)O)O)O	(-)-Epigallocatechin	Iap	Intestinal-type alkaline phosphatase	2.778e-06	0.74
EO	OC[C@H]1O[C@@H](Oc2c(oc3c(c2=O)c(O)cc(c3)O)c2ccc(cc2)O)[C@@H]([C@H]([C@@H]1O)O)O	Astragalin	Iap	Intestinal-type alkaline phosphatase	7.431e-11	0.85
EO	c1(cc(c2c(c1)O[C@@H]([C@H](C2)O)c1cc(c(cc1)O)O)O)O	Catechin	Iap	Intestinal-type alkaline phosphatase	3.953e-09	1
EO	c1(cc(c2c(c1)O[C@@H]([C@@H](C2)O)c1cc(c(cc1)O)O)O)O	Epicatechin	Iap	Intestinal-type alkaline phosphatase	3.953e-09	1
EO	c1(cc(c2c(c1)oc(c(c2=O)O[C@@H]1O[C@H]([C@@H]([C@H]([C@@H]1O)O)O)C)c1ccc(cc1)O)O)O	Kaempferol 3-O-rhamnoside	Iap	Intestinal-type alkaline phosphatase	2.146e-11	0.68
EO	c1(cc(c2c(c1)oc(c(c2=O)O[C@@H]1O[C@H]([C@@H]([C@H]([C@@H]1O)O)O)C)c1cc(c(c(c1)O)O)O)O)O	Myricitrin	Iap	Intestinal-type alkaline phosphatase	1.24e-09	0.66
EO	c1(cc(c2c(c1)oc(c(c2=O)O[C@@H]1O[C@H]([C@@H]([C@H]([C@@H]1O)O)O)C)c1ccc(c(c1)O)O)O)O	Quercetin3-O-alpha-rhamnopyranoside	Iap	Intestinal-type alkaline phosphatase	1.827e-13	0.79
EO	c1(cc(c2c(c1)oc(c(c2=O)O[C@H]1[C@@H]([C@@H]([C@@H]([C@H](O1)CO)O)O)O)c1ccc(c(c1)O)O)O)O	Quercetin-3-O-glucoside	Iap	Intestinal-type alkaline phosphatase	2.476e-14	1
EO	c1(cc(c2c(c1)oc(c(c2=O)O[C@H]1[C@@H]([C@H]([C@@H]([C@H](O1)CO[C@H]1[C@H]([C@H]([C@H]([C@@H](O1)C)O)O)O)O)O)O)c1ccc(c(c1)O)O)O)O	Rutin	Iap	Intestinal-type alkaline phosphatase	1.919e-12	0.76
EO	Oc1cc2c(=O)oc3c4c2c(c1O)oc(=O)c4cc(c3O)O	ellagic acid	IGF1R	Insulin-like growth factor 1 receptor	0.739	1
EO	c1(cc(c2c(c1)oc(c(c2=O)O)c1ccc(c(c1)O)O)O)O	Quercetin	IGF1R	Insulin-like growth factor 1 receptor	0.6409	1
EO	c1(cc(c2c(c1)oc(c(c2=O)O[C@H]1[C@@H]([C@@H]([C@@H]([C@H](O1)CO)O)O)O)c1ccc(c(c1)O)O)O)O	Quercetin-3-O-glucoside	IL2	Interleukin-2	4.254e-39	0.63
EO	OC[C@H]1O[C@@H](Oc2c(oc3c(c2=O)c(O)cc(c3)O)c2ccc(cc2)O)[C@@H]([C@H]([C@@H]1O)O)O	Astragalin	Il5	Interleukin-5	2.488e-11	0.63
EO	c1(cc(c2c(c1)oc(c(c2=O)O[C@H]1[C@@H]([C@@H]([C@@H]([C@H](O1)CO)O)O)O)c1ccc(c(c1)O)O)O)O	Quercetin-3-O-glucoside	Il5	Interleukin-5	1.98e-11	0.63
EO	Oc1cc2c(=O)oc3c4c2c(c1O)oc(=O)c4cc(c3O)O	ellagic acid	INSR	Insulin receptor	0.07583	1
EO	c1(cc(c2c(c1)O[C@@H]([C@@H](C2)OC(=O)c1cc(c(c(c1)O)O)O)c1cc(c(c(c1)O)O)O)O)O	Epigallocatechin gallate	KCNH2	Potassium voltage-gated channel subfamily H member 2	0.9999	1
EO	c1(cc(c2c(c1)oc(c(c2=O)O)c1ccc(cc1)O)O)O	Kaempferol	KDM4E	Lysine-specific demethylase 4E	4.361e-12	0.75
EO	c1(cc(c2c(c1)oc(c(c2=O)O)c1ccc(c(c1)O)O)O)O	Quercetin	KDM4E	Lysine-specific demethylase 4E	5.117e-12	0.76
EO	Oc1cc2c(=O)oc3c4c2c(c1O)oc(=O)c4cc(c3O)O	ellagic acid	KDR	Vascular endothelial growth factor receptor 2	1	1
EO	c1(cc(c2c(c1)oc(c(c2=O)O)c1ccc(c(c1)O)O)O)O	Quercetin	KDR	Vascular endothelial growth factor receptor 2	0.9993	1
EO	c1(cc(c2c(c1)O[C@@H](CC2=O)c1cc(c(cc1)O)O)O)O	Eriodictyol	KLK2	Kallikrein-2	2.386e-25	0.64
EO	C/C(=CC=CC=C(C=CC=C(C=CC1=C(C)CCCC1(C)C)/C)/C)/C=C/C=C(/C=C/C1=C(C)CCCC1(C)C)C	beta-carotene	LGB	Beta-lactoglobulin	2.558e-100	0.8
EO	c1(cc(c2c(c1)oc(c(c2=O)O)c1ccc(c(c1)O)O)O)O	Quercetin	LOX1.1	Seed linoleate 13S-lipoxygenase-1	3.025e-07	0.6
EO	c1(cc(c2c(c1)oc(c(c2=O)O)c1ccc(cc1)O)O)O	Kaempferol	LPO	Lactoperoxidase	8.712e-24	0.78
EO	c1(cc(c2c(c1)oc(c(c2=O)O)c1ccc(c(c1)O)O)O)O	Quercetin	LPO	Lactoperoxidase	3.937e-30	1
EO	c1c(c(c(cc1)O)O)O	Pyrogallol	luxP	Autoinducer 2-binding periplasmic protein LuxP	1.111e-36	1
EO	Oc1cc2c(=O)oc3c4c2c(c1O)oc(=O)c4cc(c3O)O	ellagic acid	Lyn	Tyrosine-protein kinase Lyn	2.9e-124	1
EO	c1(cc(c2c(c1)oc(c(c2=O)O)c1ccc(cc1)O)O)O	Kaempferol	MAOA	Amine oxidase [flavin-containing] A	2.729e-12	0.81
EO	c1(cc(c2c(c1)oc(c(c2=O)O)c1ccc(c(c1)O)O)O)O	Quercetin	MAOA	Amine oxidase [flavin-containing] A	1.392e-11	1
EO	c1(cc(c2c(c1)oc(c(c2=O)O)c1ccc(c(c1)O)O)O)O	Quercetin	MAOA	Amine oxidase [flavin-containing] A	0.0009832	1
EO	Oc1cc2c(=O)oc3c4c2c(c1O)oc(=O)c4cc(c3O)O	ellagic acid	MAP3K8	Mitogen-activated protein kinase kinase kinase 8	0.00026	1
EO	c1(cc(c2c(c1)O[C@@H]([C@@H](C2)OC(=O)c1cc(c(c(c1)O)O)O)c1cc(c(c(c1)O)O)O)O)O	Epigallocatechin gallate	MAPK14	Mitogen-activated protein kinase 14	0.8113	1
EO	c1(cc(c2c(c1)O[C@@H]([C@@H](C2)OC(=O)c1cc(c(c(c1)O)O)O)c1cc(c(c(c1)O)O)O)O)O	Epigallocatechin gallate	MAPKAPK5	MAP kinase-activated protein kinase 5	3.408e-08	1
EO	c1(cc(c2c(c1)O[C@@H]([C@@H](C2)OC(=O)c1cc(c(c(c1)O)O)O)c1cc(c(c(c1)O)O)O)O)O	Epigallocatechin gallate	MAPT	Microtubule-associated protein tau	1.946e-05	1
EO	c1(cc(c2c(c1)oc(c(c2=O)O)c1ccc(cc1)O)O)O	Kaempferol	MAPT	Microtubule-associated protein tau	1.459e-06	0.75
EO	c1(cc(c2c(c1)oc(c(c2=O)O)c1ccc(c(c1)O)O)O)O	Quercetin	MAPT	Microtubule-associated protein tau	4.285e-09	0.76
EO	Oc1cc(C(=O)OC[C@@H]2[C@@H]3[C@@H]([C@H]([C@@H](O2)OC(=O)c2cc(c(c(c2)O)O)O)OC(=O)c2c4[C@H]([C@@H](C(=O)O3)CC(=O)O)[C@@H](C(=O)Oc4c(c(c2)O)O)O)OC(=O)c2cc(c(c(c2)O)O)O)cc(c1O)O	Chebulinic acid	MCL1	Induced myeloid leukemia cell differentiation protein Mcl-1	0.08724	1
EO	c1(cc2c(c(c1O)O)c1c(cc(c(c1O)O)O)C(=O)OC[C@H]1O[C@H]([C@@H]([C@H]([C@H]1O)OC2=O)O)OC(=O)c1cc(c(c(c1)O)O)O)O	Corilagin	MCL1	Induced myeloid leukemia cell differentiation protein Mcl-1	0.01598	1
EO	OC(=O)Cc1c[nH]c2c1cccc330	Indole-3-acetic acid	MCL1	Induced myeloid leukemia cell differentiation protein Mcl-1	2.902e-06	0.62
EO	c1(cc(c2c(c1)oc(c(c2=O)O)c1ccc(cc1)O)O)O	Kaempferol	mdh	Malate dehydrogenase	8.712e-24	0.78
EO	c1(cc(c2c(c1)oc(c(c2=O)O)c1ccc(c(c1)O)O)O)O	Quercetin	mdh	Malate dehydrogenase	3.937e-30	1
EO	Oc1cc2c(=O)oc3c4c2c(c1O)oc(=O)c4cc(c3O)O	ellagic acid	MET	Hepatocyte growth factor receptor	0.8529	1
EO	c1(cc(c2c(c1)O[C@@H]([C@@H](C2)OC(=O)c1cc(c(c(c1)O)O)O)c1cc(c(c(c1)O)O)O)O)O	Epigallocatechin gallate	MET	Hepatocyte growth factor receptor	0.1645	1
EO	c1(cc(c2c(c1)oc(c(c2=O)O)c1ccc(c(c1)O)O)O)O	Quercetin	MET	Hepatocyte growth factor receptor	0.7762	1
EO	c1(cc(c2c(c1)O[C@@H]([C@@H](C2)OC(=O)c1cc(c(c(c1)O)O)O)c1cc(c(c(c1)O)O)O)O)O	Epigallocatechin gallate	mex-5	Zinc finger protein mex-5	8.069e-05	1
EO	Oc1cc2c(=O)oc3c4c2c(c1O)oc(=O)c4cc(c3O)O	ellagic acid	MIF	Macrophage migration inhibitory factor	6.503e-05	1
EO	c1(cc(c2c(c1)oc(c(c2=O)O)c1ccc(c(c1)O)O)O)O	Quercetin	MMP13	Collagenase 3	0.8636	1
EO	c1(cc(c2c(c1)O[C@@H]([C@@H](C2)OC(=O)c1cc(c(c(c1)O)O)O)c1cc(c(c(c1)O)O)O)O)O	Epigallocatechin gallate	MMP14	Matrix metalloproteinase-14	6.887e-07	1
EO	c1(cc(c2c(c1)O[C@@H]([C@@H](C2)OC(=O)c1cc(c(c(c1)O)O)O)c1cc(c(c(c1)O)O)O)O)O	Epigallocatechin gallate	MMP2	72 kDa type IV collagenase	0.1088	1
EO	c1(cc(c2c(c1)oc(c(c2=O)O)c1ccc(c(c1)O)O)O)O	Quercetin	MMP2	72 kDa type IV collagenase	0.6846	1
EO	c1(cc(c2c(c1)oc(c(c2=O)O)c1ccc(c(c1)O)O)O)O	Quercetin	MMP3	Stromelysin-1	0.5921	1
EO	c1(cc(c2c(c1)oc(c(c2=O)O)c1ccc(c(c1)O)O)O)O	Quercetin	MMP9	Matrix metalloproteinase-9	0.1025	1
EO	c1(cc(c2c(c1)oc(c(c2=O)O)c1ccc(cc1)O)O)O	Kaempferol	MPG	DNA-3-methyladenine glycosylase	3.17e-38	0.75
EO	c1(cc(c2c(c1)oc(c(c2=O)O)c1ccc(c(c1)O)O)O)O	Quercetin	MPG	DNA-3-methyladenine glycosylase	4.527e-34	0.67
EO	c1(cc(c2c(c1)oc(c(c2=O)O)c1ccc(cc1)O)O)O	Kaempferol	MPO	Myeloperoxidase	1.932e-07	0.78
EO	c1(cc(c2c(c1)oc(c(c2=O)O)c1ccc(c(c1)O)O)O)O	Quercetin	MPO	Myeloperoxidase	1.309e-07	1
EO	c1(cc(c2c(c1)oc(c(c2=O)O)c1ccc(cc1)O)O)O	Kaempferol	MYLK	Myosin light chain kinase, smooth muscle	7.568e-06	0.75
EO	c1(cc(c2c(c1)oc(c(c2=O)O)c1ccc(c(c1)O)O)O)O	Quercetin	MYLK	Myosin light chain kinase, smooth muscle	6.783e-06	0.76
EO	c1(cc(c2c(c1)oc(c(c2=O)O)c1ccc(cc1)O)O)O	Kaempferol	nanH	Sialidase	9.989e-27	0.78
EO	c1(cc(c2c(c1)oc(c(c2=O)O)c1ccc(c(c1)O)O)O)O	Quercetin	nanH	Sialidase	4.566e-29	1
EO	c1(cc(c2c(c1)oc(c(c2=O)O)c1ccc(c(c1)O)O)O)O	Quercetin	NEK2	Serine/threonine-protein kinase Nek2	0.002251	1
EO	c1(cc(c2c(c1)oc(c(c2=O)O)c1ccc(cc1)O)O)O	Kaempferol	NEK6	Serine/threonine-protein kinase Nek6	2.331e-15	0.78
EO	c1(cc(c2c(c1)oc(c(c2=O)O)c1ccc(c(c1)O)O)O)O	Quercetin	NEK6	Serine/threonine-protein kinase Nek6	2.176e-19	1
EO	OC[C@H]1O[C@@H](Oc2c(oc3c(c2=O)c(O)cc(c3)O)c2ccc(cc2)O)[C@@H]([C@H]([C@@H]1O)O)O	Astragalin	NMUR2	Neuromedin-U receptor 2	1.279e-19	0.64
EO	c1(cc(c2c(c1)oc(c(c2=O)O[C@@H]1O[C@H]([C@@H]([C@H]([C@@H]1O)O)O)C)c1ccc(cc1)O)O)O	Kaempferol 3-O-rhamnoside	NMUR2	Neuromedin-U receptor 2	9.54e-22	0.71
EO	c1(cc(c2c(c1)oc(c(c2=O)O[C@@H]1O[C@H]([C@@H]([C@H]([C@@H]1O)O)O)C)c1cc(c(c(c1)O)O)O)O)O	Myricitrin	NMUR2	Neuromedin-U receptor 2	5.829e-21	0.69
EO	c1(cc(c2c(c1)oc(c(c2=O)O[C@@H]1O[C@H]([C@@H]([C@H]([C@@H]1O)O)O)C)c1ccc(c(c1)O)O)O)O	Quercetin3-O-alpha-rhamnopyranoside	NMUR2	Neuromedin-U receptor 2	3.062e-25	0.83
EO	c1(cc(c2c(c1)oc(c(c2=O)O[C@H]1[C@@H]([C@@H]([C@@H]([C@H](O1)CO)O)O)O)c1ccc(c(c1)O)O)O)O	Quercetin-3-O-glucoside	NMUR2	Neuromedin-U receptor 2	8.541e-23	0.75
EO	c1(cc(c2c(c1)oc(c(c2=O)O[C@H]1[C@@H]([C@H]([C@@H]([C@H](O1)CO[C@H]1[C@H]([C@H]([C@H]([C@@H](O1)C)O)O)O)O)O)O)c1ccc(c(c1)O)O)O)O	Rutin	NMUR2	Neuromedin-U receptor 2	3.937e-30	1
EO	OC(=O)C(CCCN=C(N)N)N	DL-Arginine	Nos1	Nitric oxide synthase, brain	5.818e-14	0.72
EO	OC(=O)C(CCCN=C(N)N)N	DL-Arginine	NOS1	Nitric oxide synthase, brain	7.834e-13	0.72
EO	OC(=O)C(CCCN=C(N)N)N	DL-Arginine	Nos2	Nitric oxide synthase, inducible	5.03e-32	0.72
EO	OC(=O)C(CCCN=C(N)N)N	DL-Arginine	NOS2	Nitric oxide synthase, inducible	1.11e-16	0.72
EO	OC(=O)C(CCCN=C(N)N)N	DL-Arginine	Nos2	Nitric oxide synthase, inducible	4.297e-14	0.72
EO	c1(cc(c2c(c1)O[C@@H]([C@@H](C2)O)c1cc(c(c(c1)O)O)O)O)O	(-)-Epigallocatechin	NOS3	Nitric oxide synthase, endothelial	1.023e-08	0.74
EO	c1(cc(c2c(c1)O[C@@H]([C@H](C2)O)c1cc(c(cc1)O)O)O)O	Catechin	NOS3	Nitric oxide synthase, endothelial	4.509e-11	1
EO	OC(=O)C(CCCN=C(N)N)N	DL-Arginine	NOS3	Nitric oxide synthase, endothelial	7.413e-13	0.72
EO	c1(cc(c2c(c1)O[C@@H]([C@@H](C2)O)c1cc(c(cc1)O)O)O)O	Epicatechin	NOS3	Nitric oxide synthase, endothelial	4.509e-11	1
EO	OC[C@H]1O[C@@H](Oc2c(oc3c(c2=O)c(O)cc(c3)O)c2ccc(cc2)O)[C@@H]([C@H]([C@@H]1O)O)O	Astragalin	NOX4	NADPH oxidase 4	4.348e-18	0.85
EO	c1(cc(c2c(c1)oc(c(c2=O)O)c1ccc(cc1)O)O)O	Kaempferol	NOX4	NADPH oxidase 4	1.895e-21	0.78
EO	c1(cc(c2c(c1)oc(c(c2=O)O[C@@H]1O[C@H]([C@@H]([C@H]([C@@H]1O)O)O)C)c1ccc(cc1)O)O)O	Kaempferol 3-O-rhamnoside	NOX4	NADPH oxidase 4	8.428e-18	0.64
EO	c1(cc(c2c(c1)oc(c(c2=O)O[C@@H]1O[C@H]([C@@H]([C@H]([C@@H]1O)O)O)C)c1cc(c(c(c1)O)O)O)O)O	Myricitrin	NOX4	NADPH oxidase 4	4.108e-15	0.61
EO	c1(cc(c2c(c1)oc(c(c2=O)O)c1ccc(c(c1)O)O)O)O	Quercetin	NOX4	NADPH oxidase 4	1.561e-25	1
EO	c1(cc(c2c(c1)oc(c(c2=O)O[C@@H]1O[C@H]([C@@H]([C@H]([C@@H]1O)O)O)C)c1ccc(c(c1)O)O)O)O	Quercetin3-O-alpha-rhamnopyranoside	NOX4	NADPH oxidase 4	8.006e-21	0.76
EO	c1(cc(c2c(c1)oc(c(c2=O)O[C@H]1[C@@H]([C@@H]([C@@H]([C@H](O1)CO)O)O)O)c1ccc(c(c1)O)O)O)O	Quercetin-3-O-glucoside	NOX4	NADPH oxidase 4	4.163e-21	1
EO	c1(cc(c2c(c1)oc(c(c2=O)O[C@H]1[C@@H]([C@H]([C@@H]([C@H](O1)CO[C@H]1[C@H]([C@H]([C@H]([C@@H](O1)C)O)O)O)O)O)O)c1ccc(c(c1)O)O)O)O	Rutin	NOX4	NADPH oxidase 4	1.99e-18	0.75
EO	CCC(CCC(C)C1CCC2C1(CCC3C2CC=C4C3(CCC(C4)O)C)C)C(C)C	Phytosterols	NPC1L1	NPC1-like intracellular cholesterol transporter 1	2.131e-74	0.7
EO	c1(cc(c2c(c1)oc(c(c2=O)O[C@@H]1O[C@H]([C@@H]([C@H]([C@@H]1O)O)O)C)c1ccc(cc1)O)O)O	Kaempferol 3-O-rhamnoside	NQO2	Ribosyldihydronicotinamide dehydrogenase [quinone]	0.0005651	1
EO	CCC(CCC(C)C1CCC2C1(CCC3C2CC=C4C3(CCC(C4)O)C)C)C(C)C	Phytosterols	NR1H2	Oxysterols receptor LXR-beta	8.146e-08	0.74
EO	CCC(CCC(C)C1CCC2C1(CCC3C2CC=C4C3(CCC(C4)O)C)C)C(C)C	Phytosterols	NR1H3	Oxysterols receptor LXR-alpha	9.144e-26	0.79
EO	C/C(=CC=CC=C(C=CC=C(C=CC1=C(C)CCCC1(C)C)/C)/C)/C=C/C=C(/C=C/C1=C(C)CCCC1(C)C)C	beta-carotene	NR4A1	Nuclear receptor subfamily 4 group A member 1	5.581e-07	0.8
EO	c1(cc(c2c(c1)oc(c(c2=O)O)c1ccc(cc1)O)O)O	Kaempferol	Nt5e	5'-nucleotidase	3.124e-08	0.78
EO	c1(cc(c2c(c1)oc(c(c2=O)O)c1ccc(c(c1)O)O)O)O	Quercetin	Nt5e	5'-nucleotidase	2.504e-10	1
EO	Oc1cc2c(=O)oc3c4c2c(c1O)oc(=O)c4cc(c3O)O	ellagic acid	NUAK1	NUAK family SNF1-like kinase 1	2.255e-11	1
EO	c1(cc(c2c(c1)oc(c(c2=O)O)c1ccc(cc1)O)O)O	Kaempferol	NUAK1	NUAK family SNF1-like kinase 1	4.692e-09	0.78
EO	c1(cc(c2c(c1)oc(c(c2=O)O)c1ccc(c(c1)O)O)O)O	Quercetin	NUAK1	NUAK family SNF1-like kinase 1	2.255e-11	1
EO	OC[C@H]1O[C@@H](Oc2c(oc3c(c2=O)c(O)cc(c3)O)c2ccc(cc2)O)[C@@H]([C@H]([C@@H]1O)O)O	Astragalin	P4HB	Protein disulfide-isomerase	2.115e-67	1
EO	c1(cc(c2c(c1)oc(c(c2=O)O[C@@H]1O[C@H]([C@@H]([C@H]([C@@H]1O)O)O)C)c1ccc(cc1)O)O)O	Kaempferol 3-O-rhamnoside	P4HB	Protein disulfide-isomerase	1.22e-69	0.85
EO	c1(cc(c2c(c1)oc(c(c2=O)O[C@@H]1O[C@H]([C@@H]([C@H]([C@@H]1O)O)O)C)c1cc(c(c(c1)O)O)O)O)O	Myricitrin	P4HB	Protein disulfide-isomerase	1.403e-65	1
EO	c1(cc(c2c(c1)oc(c(c2=O)O[C@@H]1O[C@H]([C@@H]([C@H]([C@@H]1O)O)O)C)c1ccc(c(c1)O)O)O)O	Quercetin3-O-alpha-rhamnopyranoside	P4HB	Protein disulfide-isomerase	9.57e-72	1
EO	c1(cc(c2c(c1)oc(c(c2=O)O[C@H]1[C@@H]([C@@H]([C@@H]([C@H](O1)CO)O)O)O)c1ccc(c(c1)O)O)O)O	Quercetin-3-O-glucoside	P4HB	Protein disulfide-isomerase	3.903e-69	1
EO	c1(cc(c2c(c1)oc(c(c2=O)O[C@H]1[C@@H]([C@H]([C@@H]([C@H](O1)CO[C@H]1[C@H]([C@H]([C@H]([C@@H](O1)C)O)O)O)O)O)O)c1ccc(c(c1)O)O)O)O	Rutin	P4HB	Protein disulfide-isomerase	6.54e-73	1
EO	O[C@@H]1[C@@H](COC(=O)c2cc(O)c(c(c2)O)O)OC([C@@H]([C@H]1OC(=O)c1cc(O)c(c(c1)O)O)O)O	3,6-di-O-galloyl-(alpha/beta)-4C1-glucopyranose	Parg	Poly(ADP-ribose) glycohydrolase	6.845e-19	0.79
EO	Oc1cc2c(=O)oc3c4c2c(c1O)oc(=O)c4cc(c3O)O	ellagic acid	PDGFRB	Platelet-derived growth factor receptor beta	0.3381	1
EO	c1(cc(c2c(c1)O[C@@H]([C@@H](C2)O)c1cc(c(c(c1)O)O)O)O)O	(-)-Epigallocatechin	PGAM1	Phosphoglycerate mutase 1	2.757e-38	0.62
EO	c1(cc(c2c(c1)O[C@@H]([C@@H](C2)OC(=O)c1cc(c(c(c1)O)O)O)c1cc(c(c(c1)O)O)O)O)O	Epigallocatechin gallate	PGAM1	Phosphoglycerate mutase 1	5.121e-61	1
EO	c1(cc(c2c(c1)O[C@@H]([C@@H](C2)O)c1cc(c(c(c1)O)O)O)O)O	(-)-Epigallocatechin	PGD	6-phosphogluconate dehydrogenase, decarboxylating	4.706e-60	0.62
EO	c1(cc(c2c(c1)O[C@@H]([C@H](C2)O)c1cc(c(cc1)O)O)O)O	Catechin	PGD	6-phosphogluconate dehydrogenase, decarboxylating	6.991e-56	0.6
EO	c1(cc(c2c(c1)O[C@@H]([C@@H](C2)O)c1cc(c(cc1)O)O)O)O	Epicatechin	PGD	6-phosphogluconate dehydrogenase, decarboxylating	6.991e-56	0.6
EO	c1(cc(c2c(c1)O[C@@H]([C@@H](C2)OC(=O)c1cc(c(c(c1)O)O)O)c1cc(c(c(c1)O)O)O)O)O	Epigallocatechin gallate	PGD	6-phosphogluconate dehydrogenase, decarboxylating	4.664e-96	1
EO	c1(cc(c2c(c1)oc(c(c2=O)O)c1ccc(c(c1)O)O)O)O	Quercetin	PIK3R1	Phosphatidylinositol 3-kinase regulatory subunit alpha	0.2183	1
EO	c1(cc(c2c(c1)oc(c(c2=O)O)c1ccc(c(c1)O)O)O)O	Quercetin	PIM1	Serine/threonine-protein kinase pim-1	0.4143	1
EO	c1(cc(c2c(c1)oc(c(c2=O)O)c1ccc(cc1)O)O)O	Kaempferol	PKN1	Serine/threonine-protein kinase N1	8.542e-10	0.78
EO	c1(cc(c2c(c1)oc(c(c2=O)O)c1ccc(c(c1)O)O)O)O	Quercetin	PKN1	Serine/threonine-protein kinase N1	2.589e-12	1
EO	c1(cc(c2c(c1)oc(c(c2=O)O)c1ccc(c(c1)O)O)O)O	Quercetin	PLA2G1B	Phospholipase A2	0.0002226	1
EO	Oc1cc2c(=O)oc3c4c2c(c1O)oc(=O)c4cc(c3O)O	ellagic acid	PLK1	Serine/threonine-protein kinase PLK1	0.02437	1
EO	Oc1cc2c(=O)oc3c4c2c(c1O)oc(=O)c4cc(c3O)O	ellagic acid	PLK4	Serine/threonine-protein kinase PLK4	0.01012	1
EO	Oc1cc2c(=O)oc3c4c2c(c1O)oc(=O)c4cc(c3O)O	ellagic acid	pol	Integrase	2.116e-06	1
EO	c1(cc(c2c(c1)O[C@@H]([C@@H](C2)OC(=O)c1cc(c(c(c1)O)O)O)c1cc(c(c(c1)O)O)O)O)O	Epigallocatechin gallate	pol	Reverse transcriptase/RNaseH	7.467e-05	1
EO	c1(c(cc(cc1O)C(=O)O)O)O	Gallic acid	pol	Integrase	2.453e-52	0.65
EO	c1(c(cc(cc1O)C(=O)O)O)O	Gallic acid	pol	Integrase	1.536e-10	0.65
EO	c1(cc(c2c(c1)oc(c(c2=O)O)c1ccc(cc1)O)O)O	Kaempferol	pol	Integrase	3.331e-16	0.75
EO	c1(c(cc(cc1)C(=O)O)O)O	Protocatechuic acid	pol	Integrase	2.65e-34	0.64
EO	c1(cc(c2c(c1)oc(c(c2=O)O)c1ccc(c(c1)O)O)O)O	Quercetin	pol	Integrase	3.817e-19	0.76
EO	c1(c(cc(cc1O)C(=O)O)O)O	Gallic acid	POLA1	DNA polymerase alpha catalytic subunit	2.787e-08	0.65
EO	CC(=C)C1CCC2(C1C3CCC4C5(CCC(C(C5CCC4(C3(CC2)C)C)(C)C)O)C)C	3beta-Hydroxy-20(29)-lupene	Polb	DNA polymerase beta	5.241e-39	0.72
EO	c1(c(cc(cc1O)C(=O)O)O)O	Gallic acid	POLB	DNA polymerase beta	1.518e-10	0.65
EO	C1[C@@H](C([C@H]2[C@](C1)([C@@H]1[C@@](CC2)([C@]2([C@H](CC1)[C@@H]1[C@](CC2)(C)CC[C@H]1C(=C)C)C)C)C)(C)C)O	Lupeol	Polb	DNA polymerase beta	5.241e-39	0.72
EO	O=C[C@]12CC[C@@]3(C(=CC[C@H]4[C@@]3(C)CC[C@@H]3[C@]4(C)CC[C@@H](C3(C)C)O)[C@@H]2CC(CC1)(C)C)C	Oleanolic aldehyde	Polb	DNA polymerase beta	2.838e-71	0.71
EO	O=C[C@]12CC[C@@]3(C(=CC[C@H]4[C@@]3(C)CC[C@@H]3[C@]4(C)CC[C@@H](C3(C)C)O)[C@@H]2CC(CC1)(C)C)C	Oleanolic aldehyde	POLB	DNA polymerase beta	1.869e-11	0.71
EO	Oc1cc2c(=O)oc3c4c2c(c1O)oc(=O)c4cc(c3O)O	ellagic acid	POLH	DNA polymerase eta	1.089e-50	1
EO	Oc1cc2c(=O)oc3c4c2c(c1O)oc(=O)c4cc(c3O)O	ellagic acid	POLI	DNA polymerase iota	5.121e-61	1
EO	c1(cc(c2c(c1)O[C@@H](CC2=O)c1cc(c(cc1)O)O)O)O	Eriodictyol	PPO2	Polyphenol oxidase 2	1.643e-10	0.65
EO	c1(cc(c2c(c1)O[C@@H](CC2=O)c1ccc(cc1)O)O)O	Naringenin	PPO2	Polyphenol oxidase 2	1.35e-10	0.72
EO	O=C[C@]12CC[C@@]3(C(=CC[C@H]4[C@@]3(C)CC[C@@H]3[C@]4(C)CC[C@@H](C3(C)C)O)[C@@H]2CC(CC1)(C)C)C	Oleanolic aldehyde	protease	Protease	1.577e-14	0.71
EO	c1(cc(c2c(c1)O[C@@H]([C@@H](C2)OC(=O)c1cc(c(c(c1)O)O)O)c1cc(c(c(c1)O)O)O)O)O	Epigallocatechin gallate	PTGES	Prostaglandin E synthase	0.3802	1
EO	c1(cc(c2c(c1)O[C@@H]([C@@H](C2)O)c1cc(c(c(c1)O)O)O)O)O	(-)-Epigallocatechin	PTGS1	Prostaglandin G/H synthase 1	2.118e-06	0.74
EO	c1(cc(c2c(c1)O[C@@H]([C@H](C2)O)c1cc(c(cc1)O)O)O)O	Catechin	PTGS1	Prostaglandin G/H synthase 1	2.845e-09	1
EO	c1(cc(c2c(c1)O[C@@H]([C@@H](C2)O)c1cc(c(cc1)O)O)O)O	Epicatechin	PTGS1	Prostaglandin G/H synthase 1	2.845e-09	1
EO	Oc1cc2c(=O)oc3c4c2c(c1O)oc(=O)c4cc(c3O)O	ellagic acid	PTK2	Focal adhesion kinase 1	0.4508	1
EO	c1(cc(c2c(c1)oc(c(c2=O)O)c1ccc(c(c1)O)O)O)O	Quercetin	PTK2	Focal adhesion kinase 1	0.4508	1
EO	CC(=C)C1CCC2(C1C3CCC4C5(CCC(C(C5CCC4(C3(CC2)C)C)(C)C)O)C)C	3beta-Hydroxy-20(29)-lupene	PTPN1	Tyrosine-protein phosphatase non-receptor type 1	4.29e-09	1
EO	C1[C@@H](C([C@H]2[C@](C1)([C@@H]1[C@@](CC2)([C@]2([C@H](CC1)[C@@H]1[C@](CC2)(C)CC[C@H]1C(=C)C)C)C)C)(C)C)O	Lupeol	PTPN1	Tyrosine-protein phosphatase non-receptor type 1	4.29e-09	1
EO	O=C[C@]12CC[C@@]3(C(=CC[C@H]4[C@@]3(C)CC[C@@H]3[C@]4(C)CC[C@@H](C3(C)C)O)[C@@H]2CC(CC1)(C)C)C	Oleanolic aldehyde	PTPN1	Tyrosine-protein phosphatase non-receptor type 1	3.052e-55	0.71
EO	O=C[C@]12CC[C@@]3(C(=CC[C@H]4[C@@]3(C)CC[C@@H]3[C@]4(C)CC[C@@H](C3(C)C)O)[C@@H]2CC(CC1)(C)C)C	Oleanolic aldehyde	PTPN2	Tyrosine-protein phosphatase non-receptor type 2	3.788e-76	0.71
EO	O=C[C@]12CC[C@@]3(C(=CC[C@H]4[C@@]3(C)CC[C@@H]3[C@]4(C)CC[C@@H](C3(C)C)O)[C@@H]2CC(CC1)(C)C)C	Oleanolic aldehyde	PTPN6	Tyrosine-protein phosphatase non-receptor type 6	5.191e-21	0.63
EO	c1(cc(c2c(c1)oc(c(c2=O)O)c1ccc(cc1)O)O)O	Kaempferol	PTPRS	Receptor-type tyrosine-protein phosphatase S	5.492e-59	0.75
EO	c1(cc(c2c(c1)oc(c(c2=O)O)c1ccc(c(c1)O)O)O)O	Quercetin	PTPRS	Receptor-type tyrosine-protein phosphatase S	4.676e-55	0.67
EO	c1(cc(c2c(c1)oc(c(c2=O)O)c1ccc(c(c1)O)O)O)O	Quercetin	PYGL	Glycogen phosphorylase, liver form	0.01865	1
EO	C/C(=CC=CC=C(C=CC=C(C=CC1=C(C)CCCC1(C)C)/C)/C)/C=C/C=C(/C=C/C1=C(C)CCCC1(C)C)C	beta-carotene	Rara	Retinoic acid receptor alpha	8.785e-63	0.8
EO	C/C(=CC=CC=C(C=CC=C(C=CC1=C(C)CCCC1(C)C)/C)/C)/C=C/C=C(/C=C/C1=C(C)CCCC1(C)C)C	beta-carotene	RARA	Retinoic acid receptor alpha	9.348e-12	0.8
EO	C/C(=CC=CC=C(C=CC=C(C=CC1=C(C)CCCC1(C)C)/C)/C)/C=C/C=C(/C=C/C1=C(C)CCCC1(C)C)C	beta-carotene	Rarb	Retinoic acid receptor beta	6.646e-49	0.8
EO	C/C(=CC=CC=C(C=CC=C(C=CC1=C(C)CCCC1(C)C)/C)/C)/C=C/C=C(/C=C/C1=C(C)CCCC1(C)C)C	beta-carotene	RARB	Retinoic acid receptor beta	1.142e-11	0.8
EO	C/C(=CC=CC=C(C=CC=C(C=CC1=C(C)CCCC1(C)C)/C)/C)/C=C/C=C(/C=C/C1=C(C)CCCC1(C)C)C	beta-carotene	Rarg	Retinoic acid receptor gamma	3.945e-51	0.8
EO	C/C(=CC=CC=C(C=CC=C(C=CC1=C(C)CCCC1(C)C)/C)/C)/C=C/C=C(/C=C/C1=C(C)CCCC1(C)C)C	beta-carotene	RARG	Retinoic acid receptor gamma	1.443e-15	0.8
EO	C/C(=CC=CC=C(C=CC=C(C=CC1=C(C)CCCC1(C)C)/C)/C)/C=C/C=C(/C=C/C1=C(C)CCCC1(C)C)C	beta-carotene	RBP4	Retinol-binding protein 4	9.992e-16	0.8
EO	c1(cc(c2c(c1)O[C@@H]([C@H](C2)O)c1cc(c(cc1)O)O)O)O	Catechin	recA	Protein RecA	0.3843	1
EO	c1(cc(c2c(c1)O[C@@H]([C@@H](C2)O)c1cc(c(cc1)O)O)O)O	Epicatechin	recA	Protein RecA	0.3843	1
EO	O=C[C@]12CC[C@@]3(C(=CC[C@H]4[C@@]3(C)CC[C@@H]3[C@]4(C)CC[C@@H](C3(C)C)O)[C@@H]2CC(CC1)(C)C)C	Oleanolic aldehyde	RELA	Transcription factor p65	6.528e-08	0.71
EO	c1(cc(c2c(c1)O[C@@H](CC2=O)c1cc(c(cc1)O)O)O)O	Eriodictyol	rep	Replicase polyprotein 1ab	2.481e-10	0.73
EO	c1(cc(c2c(c1)oc(c(c2=O)O)c1ccc(cc1)O)O)O	Kaempferol	rep	Replicase polyprotein 1ab	2.327e-32	0.78
EO	c1(cc(c2c(c1)O[C@@H](CC2=O)c1ccc(cc1)O)O)O	Naringenin	rep	Replicase polyprotein 1ab	1.098e-09	0.69
EO	c1(cc(c2c(c1)oc(c(c2=O)O)c1ccc(c(c1)O)O)O)O	Quercetin	rep	Replicase polyprotein 1ab	1.704e-37	1
EO	c1(cc(c2c(c1)O[C@@H]([C@@H](C2)OC(=O)c1cc(c(c(c1)O)O)O)c1cc(c(c(c1)O)O)O)O)O	Epigallocatechin gallate	resT	Telomere resolvase ResT	3.926e-28	0.71
EO	CCC(CCC(C)C1CCC2C1(CCC3C2CC=C4C3(CCC(C4)O)C)C)C(C)C	Phytosterols	RORC	Nuclear receptor ROR-gamma	7.332e-07	0.79
EO	OC[C@H]1O[C@@H](Oc2c(oc3c(c2=O)c(O)cc(c3)O)c2ccc(cc2)O)[C@@H]([C@H]([C@@H]1O)O)O	Astragalin	RPS6KA3	Ribosomal protein S6 kinase alpha-3	6.337e-21	0.84
EO	c1(cc(c2c(c1)oc(c(c2=O)O[C@@H]1O[C@H]([C@@H]([C@H]([C@@H]1O)O)O)C)c1ccc(cc1)O)O)O	Kaempferol 3-O-rhamnoside	RPS6KA3	Ribosomal protein S6 kinase alpha-3	2.668e-22	0.77
EO	c1(cc(c2c(c1)oc(c(c2=O)O[C@@H]1O[C@H]([C@@H]([C@H]([C@@H]1O)O)O)C)c1cc(c(c(c1)O)O)O)O)O	Myricitrin	RPS6KA3	Ribosomal protein S6 kinase alpha-3	3.088e-18	0.62
EO	c1(cc(c2c(c1)oc(c(c2=O)O[C@@H]1O[C@H]([C@@H]([C@H]([C@@H]1O)O)O)C)c1ccc(c(c1)O)O)O)O	Quercetin3-O-alpha-rhamnopyranoside	RPS6KA3	Ribosomal protein S6 kinase alpha-3	3.26e-19	0.66
EO	c1(cc(c2c(c1)oc(c(c2=O)O[C@H]1[C@@H]([C@@H]([C@@H]([C@H](O1)CO)O)O)O)c1ccc(c(c1)O)O)O)O	Quercetin-3-O-glucoside	RPS6KA3	Ribosomal protein S6 kinase alpha-3	4.783e-18	0.72
EO	c1(cc(c2c(c1)oc(c(c2=O)O[C@H]1[C@@H]([C@H]([C@@H]([C@H](O1)CO[C@H]1[C@H]([C@H]([C@H]([C@@H](O1)C)O)O)O)O)O)O)c1ccc(c(c1)O)O)O)O	Rutin	RPS6KA3	Ribosomal protein S6 kinase alpha-3	7.31e-18	0.66
EO	C/C(=CC=CC=C(C=CC=C(C=CC1=C(C)CCCC1(C)C)/C)/C)/C=C/C=C(/C=C/C1=C(C)CCCC1(C)C)C	beta-carotene	Rxra	Retinoic acid receptor RXR-alpha	1.144e-41	0.8
EO	C/C(=CC=CC=C(C=CC=C(C=CC1=C(C)CCCC1(C)C)/C)/C)/C=C/C=C(/C=C/C1=C(C)CCCC1(C)C)C	beta-carotene	Rxra	Retinoic acid receptor RXR-alpha	5.594e-30	0.8
EO	C/C(=CC=CC=C(C=CC=C(C=CC1=C(C)CCCC1(C)C)/C)/C)/C=C/C=C(/C=C/C1=C(C)CCCC1(C)C)C	beta-carotene	RXRA	Retinoic acid receptor RXR-alpha	1.776e-15	0.8
EO	C/C(=CC=CC=C(C=CC=C(C=CC1=C(C)CCCC1(C)C)/C)/C)/C=C/C=C(/C=C/C1=C(C)CCCC1(C)C)C	beta-carotene	Rxrb	Retinoic acid receptor RXR-beta	1.776e-15	0.8
EO	C/C(=CC=CC=C(C=CC=C(C=CC1=C(C)CCCC1(C)C)/C)/C)/C=C/C=C(/C=C/C1=C(C)CCCC1(C)C)C	beta-carotene	RXRB	Retinoic acid receptor RXR-beta	9.661e-13	0.8
EO	C/C(=CC=CC=C(C=CC=C(C=CC1=C(C)CCCC1(C)C)/C)/C)/C=C/C=C(/C=C/C1=C(C)CCCC1(C)C)C	beta-carotene	Rxrg	Retinoic acid receptor RXR-gamma	7.772e-16	0.8
EO	C/C(=CC=CC=C(C=CC=C(C=CC1=C(C)CCCC1(C)C)/C)/C)/C=C/C=C(/C=C/C1=C(C)CCCC1(C)C)C	beta-carotene	RXRG	Retinoic acid receptor RXR-gamma	1.121e-12	0.8
EO	O[C@@H]1[C@@H](COC(=O)c2cc(O)c(c(c2)O)O)OC([C@@H]([C@H]1OC(=O)c1cc(O)c(c(c1)O)O)O)O	3,6-di-O-galloyl-(alpha/beta)-4C1-glucopyranose	SERPINE1	Plasminogen activator inhibitor 1	4.78e-27	0.64
EO	O=C(c1cc(O)c(c(c1)OC(=O)c1cc(O)c(c(c1)O)O)O)OC1C(COC(=O)c2cc(O)c(c(c2)OC(=O)c2cc(O)c(c(c2)O)O)O)OC(C(C1OC(=O)c1cc(O)c(c(c1)OC(=O)c1cc(O)c(c(c1)O)O)O)OC(=O)c1cc(O)c(c(c1)OC(=O)c1cc(O)c(c(c1)O)O)O)OC(=O)c1cc(O)c(c(c1)OC(=O)c1cc(O)c(c(c1)O)O)O.CC(=O)O.CC(=O)O	BIS(ACETIC ACID); TANNINS	SERPINE1	Plasminogen activator inhibitor 1	1.198e-27	0.79
EO	CCC(CCC(C)C1CCC2C1(CCC3C2CC=C4C3(CCC(C4)O)C)C)C(C)C	Phytosterols	Shh	Sonic hedgehog protein	3.63e-10	0.6
EO	c1(cc(c2c(c1)oc(c(c2=O)O)c1ccc(cc1)O)O)O	Kaempferol	Slc16a7	Monocarboxylate transporter 2	2.462e-62	0.78
EO	c1(cc(c2c(c1)oc(c(c2=O)O)c1ccc(c(c1)O)O)O)O	Quercetin	Slc16a7	Monocarboxylate transporter 2	2.714e-79	1
EO	Oc1cc2c(=O)oc3c4c2c(c1O)oc(=O)c4cc(c3O)O	ellagic acid	SLC22A6	Solute carrier family 22 member 6	5.218e-15	1
EO	c1(cc(c2c(c1)oc(c(c2=O)O)c1ccc(c(c1)O)O)O)O	Quercetin	Slc6a3	Sodium-dependent dopamine transporter	6.733e-06	0.6
EO	Oc1cc2c(=O)oc3c4c2c(c1O)oc(=O)c4cc(c3O)O	ellagic acid	SMAD3	Mothers against decapentaplegic homolog 3	7.773e-24	1
EO	CCC(CCC(C)C1CCC2C1(CCC3C2CC=C4C3(CCC(C4)O)C)C)C(C)C	Phytosterols	SMT1	Cycloartenol-C-24-methyltransferase	3.987e-37	0.6
EO	c1(cc(c2c(c1)O[C@@H]([C@@H](C2)O)c1cc(c(c(c1)O)O)O)O)O	(-)-Epigallocatechin	Sqle	Squalene monooxygenase	2.219e-18	0.62
EO	O[C@@H]1[C@@H](COC(=O)c2cc(O)c(c(c2)O)O)OC([C@@H]([C@H]1OC(=O)c1cc(O)c(c(c1)O)O)O)O	3,6-di-O-galloyl-(alpha/beta)-4C1-glucopyranose	Sqle	Squalene monooxygenase	8.11e-81	0.76
EO	O=C(c1cc(O)c(c(c1)OC(=O)c1cc(O)c(c(c1)O)O)O)OC1C(COC(=O)c2cc(O)c(c(c2)OC(=O)c2cc(O)c(c(c2)O)O)O)OC(C(C1OC(=O)c1cc(O)c(c(c1)OC(=O)c1cc(O)c(c(c1)O)O)O)OC(=O)c1cc(O)c(c(c1)OC(=O)c1cc(O)c(c(c1)O)O)O)OC(=O)c1cc(O)c(c(c1)OC(=O)c1cc(O)c(c(c1)O)O)O.CC(=O)O.CC(=O)O	BIS(ACETIC ACID); TANNINS	Sqle	Squalene monooxygenase	2.164e-72	0.79
EO	Oc1cc2C(=O)OC[C@H]3[C@@H]4[C@@H]([C@H]([C@@H](O3)OC(=O)c3cc(c(c(c3)O)O)O)OC(=O)c3c5[C@H]([C@@H](C(=O)O4)CC(=O)O)[C@@H](C(=O)Oc5c(c(c3)O)O)O)OC(=O)c3c(c2c(c1O)O)c(c(c(c3)O)O)O	Chebulagic acid	Sqle	Squalene monooxygenase	4.521e-67	1
EO	Oc1cc(C(=O)OC[C@@H]2[C@@H]3[C@@H]([C@H]([C@@H](O2)OC(=O)c2cc(c(c(c2)O)O)O)OC(=O)c2c4[C@H]([C@@H](C(=O)O3)CC(=O)O)[C@@H](C(=O)Oc4c(c(c2)O)O)O)OC(=O)c2cc(c(c(c2)O)O)O)cc(c1O)O	Chebulinic acid	Sqle	Squalene monooxygenase	5.078e-46	0.67
EO	c1(cc2c(c(c1O)O)c1c(cc(c(c1O)O)O)C(=O)OC[C@H]1O[C@H]([C@@H]([C@H]([C@H]1O)OC2=O)O)OC(=O)c1cc(c(c(c1)O)O)O)O	Corilagin	Sqle	Squalene monooxygenase	1.183e-82	1
EO	Oc1cc2c(=O)oc3c4c2c(c1O)oc(=O)c4cc(c3O)O	ellagic acid	Sqle	Squalene monooxygenase	1.584e-12	1
EO	c1(cc(c2c(c1)O[C@@H]([C@@H](C2)OC(=O)c1cc(c(c(c1)O)O)O)c1cc(c(c(c1)O)O)O)O)O	Epigallocatechin gallate	Sqle	Squalene monooxygenase	1.044e-70	1
EO	O=C(c1cc(O)c(c(c1)O)O)OC[C@H]1O[C@@H](OC(=O)c2cc(O)c(c(c2)O)O)[C@H]2[C@H]([C@@H]1OC(=O)C1=CC(=O)C(C3([C@@H]1c1c(C(=O)O2)cc(c(c1O3)O)O)O)(O)O)OC(=O)c1cc(O)c(c(c1)O)O	Terchebin	Sqle	Squalene monooxygenase	8.624e-58	0.74
EO	Oc1cc2c(=O)oc3c4c2c(c1O)oc(=O)c4cc(c3O)O	ellagic acid	SRC	Proto-oncogene tyrosine-protein kinase Src	0.4787	1
EO	CCC(CCC(C)C1CCC2C1(CCC3C2CC=C4C3(CCC(C4)O)C)C)C(C)C	Phytosterols	SREBF2	Sterol regulatory element-binding protein 2	2.176e-14	0.7
EO	c1(cc(c2c(c1)O[C@@H]([C@@H](C2)O)c1cc(c(c(c1)O)O)O)O)O	(-)-Epigallocatechin	sssIM	CPG DNA methylase	4.799e-19	0.62
EO	c1(cc(c2c(c1)O[C@@H]([C@@H](C2)OC(=O)c1cc(c(c(c1)O)O)O)c1cc(c(c(c1)O)O)O)O)O	Epigallocatechin gallate	sssIM	CPG DNA methylase	3.937e-30	1
EO	c1(cc(c2c(c1)O[C@@H]([C@@H](C2)O)c1cc(c(c(c1)O)O)O)O)O	(-)-Epigallocatechin	ST3GAL3	CMP-N-acetylneuraminate-beta-1,4-galactoside alpha-2,3-sialyltransferase	1.155e-49	0.62
EO	c1(cc(c2c(c1)O[C@@H]([C@@H](C2)OC(=O)c1cc(c(c(c1)O)O)O)c1cc(c(c(c1)O)O)O)O)O	Epigallocatechin gallate	ST3GAL3	CMP-N-acetylneuraminate-beta-1,4-galactoside alpha-2,3-sialyltransferase	2.714e-79	1
EO	c1(cc(c2c(c1)oc(c(c2=O)O)c1ccc(c(c1)O)O)O)O	Quercetin	St6gal1	Beta-galactoside alpha-2,6-sialyltransferase 1	2.974e-79	0.6
EO	c1(cc(c2c(c1)oc(c(c2=O)O)c1ccc(c(c1)O)O)O)O	Quercetin	ST6GAL1	Beta-galactoside alpha-2,6-sialyltransferase 1	9.981e-19	0.6
EO	c1(cc(c2c(c1)O[C@@H]([C@@H](C2)OC(=O)c1cc(c(c(c1)O)O)O)c1cc(c(c(c1)O)O)O)O)O	Epigallocatechin gallate	STAT1	Signal transducer and activator of transcription 1-alpha/beta	2.404e-06	1
EO	Oc1cc2c(=O)oc3c4c2c(c1O)oc(=O)c4cc(c3O)O	ellagic acid	Syk	Tyrosine-protein kinase SYK	2.191e-35	1
EO	c1(cc(c2c(c1)oc(c(c2=O)O)c1ccc(c(c1)O)O)O)O	Quercetin	SYN1	Synapsin-1	4.792e-44	0.72
EO	c1(cc(c2c(c1)O[C@@H](CC2=O)c1cc(c(cc1)O)O)O)O	Eriodictyol	TAS2R31	Taste receptor type 2 member 31	1.348e-83	0.6
EO	c1(cc(c2c(c1)O[C@@H](CC2=O)c1ccc(cc1)O)O)O	Naringenin	TAS2R31	Taste receptor type 2 member 31	7.08e-96	0.74
EO	c1(cc(c2c(c1)O[C@@H](CC2=O)c1ccc(cc1)O)O)O[C@H]1[C@@H]([C@H]([C@H]([C@H](O1)CO)O)O)O	Naringenin 7-O-beta-D-glucoside	TAS2R31	Taste receptor type 2 member 31	9.508e-74	0.6
EO	Oc1cc2c(=O)oc3c4c2c(c1O)oc(=O)c4cc(c3O)O	ellagic acid	TEK	Angiopoietin-1 receptor	0.07698	1
EO	c1(cc(c2c(c1)O[C@@H]([C@@H](C2)OC(=O)c1cc(c(c(c1)O)O)O)c1cc(c(c(c1)O)O)O)O)O	Epigallocatechin gallate	TERT	Telomerase reverse transcriptase	0.0134	1
EO	c1(cc(c2c(c1)oc(c(c2=O)O)c1ccc(cc1)O)O)O	Kaempferol	TIM23	Mitochondrial import inner membrane translocase subunit TIM23	4.158e-06	0.81
EO	c1(cc2c(c(c1O)O)c1c(cc(c(c1O)O)O)C(=O)OC[C@H]1O[C@H]([C@@H]([C@H]([C@H]1O)OC2=O)O)OC(=O)c1cc(c(c(c1)O)O)O)O	Corilagin	TNNC1	Troponin C, slow skeletal and cardiac muscles	1.318e-07	1
EO	Oc1cc2c(=O)oc3c4c2c(c1O)oc(=O)c4cc(c3O)O	ellagic acid	TNNC1	Troponin C, slow skeletal and cardiac muscles	2.797e-07	0.66
EO	c1(cc2c(c(c1O)O)c1c(cc(c(c1O)O)O)C(=O)OC[C@H]1O[C@H]([C@@H]([C@H]([C@H]1O)OC2=O)O)OC(=O)c1cc(c(c(c1)O)O)O)O	Corilagin	TNNI3	Troponin I, cardiac muscle	1.318e-07	1
EO	Oc1cc2c(=O)oc3c4c2c(c1O)oc(=O)c4cc(c3O)O	ellagic acid	TNNI3	Troponin I, cardiac muscle	2.797e-07	0.66
EO	c1(cc2c(c(c1O)O)c1c(cc(c(c1O)O)O)C(=O)OC[C@H]1O[C@H]([C@@H]([C@H]([C@H]1O)OC2=O)O)OC(=O)c1cc(c(c(c1)O)O)O)O	Corilagin	TNNT2	Troponin T, cardiac muscle	1.318e-07	1
EO	Oc1cc2c(=O)oc3c4c2c(c1O)oc(=O)c4cc(c3O)O	ellagic acid	TNNT2	Troponin T, cardiac muscle	2.797e-07	0.66
EO	Oc1cc2C(=O)OC[C@H]3[C@@H]4[C@@H]([C@H]([C@@H](O3)OC(=O)c3cc(c(c(c3)O)O)O)OC(=O)c3c5[C@H]([C@@H](C(=O)O4)CC(=O)O)[C@@H](C(=O)Oc5c(c(c3)O)O)O)OC(=O)c3c(c2c(c1O)O)c(c(c(c3)O)O)O	Chebulagic acid	TOP1	DNA topoisomerase 1	0.001496	1
EO	c1(cc(c2c(c1)oc(c(c2=O)O)c1ccc(c(c1)O)O)O)O	Quercetin	Top1	DNA topoisomerase 1	2.514e-74	0.6
EO	c1(cc(c2c(c1)oc(c(c2=O)O)c1ccc(cc1)O)O)O	Kaempferol	TOP2A	DNA topoisomerase 2-alpha	4.071e-11	0.75
EO	Oc1cc2c(=O)oc3c4c2c(c1O)oc(=O)c4cc(c3O)O	ellagic acid	TPT1	tRNA 2'-phosphotransferase	3.59e-28	1
EO	c1(cc(c2c(c1)O[C@@H]([C@@H](C2)OC(=O)c1cc(c(c(c1)O)O)O)c1cc(c(c(c1)O)O)O)O)O	Epigallocatechin gallate	TTR	Transthyretin	2.851e-07	1
EO	c1(cc(c2c(c1)oc(c(c2=O)O)c1ccc(c(c1)O)O)O)O	Quercetin	TTR	Transthyretin	9.297e-08	0.6
EO	c1(c(cc(cc1)C(=O)O)O)O	Protocatechuic acid	Tyr	Tyrosinase	1.021e-24	0.62
EO	c1(cc2c(c(c1O)O)c1c(cc(c(c1O)O)O)C(=O)OC[C@H]1O[C@H]([C@@H]([C@H]([C@H]1O)OC2=O)O)OC(=O)c1cc(c(c(c1)O)O)O)O	Corilagin	VCP	Transitional endoplasmic reticulum ATPase	0.004114	1
EO	c1(cc(c2c(c1)oc(c(c2=O)O)c1ccc(cc1)O)O)O	Kaempferol	V-FPS	Tyrosine-protein kinase transforming protein Fps	2.025e-93	0.75
EO	c1(cc(c2c(c1)oc(c(c2=O)O)c1ccc(c(c1)O)O)O)O	Quercetin	V-FPS	Tyrosine-protein kinase transforming protein Fps	2.97e-94	0.76
EO	c1(cc(c2c(c1)O[C@@H](CC2=O)c1cc(c(cc1)O)O)O)O	Eriodictyol	XDH	Xanthine dehydrogenase/oxidase	1.55e-06	0.69
EO	c1(cc(c2c(c1)oc(c(c2=O)O)c1ccc(cc1)O)O)O	Kaempferol	XDH	Xanthine dehydrogenase/oxidase	4.6e-38	0.81
EO	c1(cc(c2c(c1)oc(c(c2=O)O)c1ccc(cc1)O)O)O	Kaempferol	XDH	Xanthine dehydrogenase/oxidase	8.882e-16	0.78
EO	c1(cc(c2c(c1)oc(c(c2=O)O[C@@H]1O[C@H]([C@@H]([C@H]([C@@H]1O)O)O)C)c1ccc(cc1)O)O)O	Kaempferol 3-O-rhamnoside	XDH	Xanthine dehydrogenase/oxidase	1.263e-11	0.63
EO	c1(cc(c2c(c1)oc(c(c2=O)O[C@@H]1O[C@H]([C@@H]([C@H]([C@@H]1O)O)O)C)c1cc(c(c(c1)O)O)O)O)O	Myricitrin	XDH	Xanthine dehydrogenase/oxidase	5.935e-27	0.62
EO	c1(cc(c2c(c1)oc(c(c2=O)O)c1ccc(c(c1)O)O)O)O	Quercetin	XDH	Xanthine dehydrogenase/oxidase	5.18e-44	1
EO	c1(cc(c2c(c1)oc(c(c2=O)O)c1ccc(c(c1)O)O)O)O	Quercetin	XDH	Xanthine dehydrogenase/oxidase	1.887e-15	1
EO	c1(cc(c2c(c1)oc(c(c2=O)O[C@H]1[C@@H]([C@H]([C@@H]([C@H](O1)CO[C@H]1[C@H]([C@H]([C@H]([C@@H](O1)C)O)O)O)O)O)O)c1ccc(c(c1)O)O)O)O	Rutin	XDH	Xanthine dehydrogenase/oxidase	3.384e-26	0.66
EO	c1(cc(c2c(c1)O[C@@H]([C@@H](C2)O)c1cc(c(c(c1)O)O)O)O)O	(-)-Epigallocatechin	ZWF1	Glucose-6-phosphate 1-dehydrogenase	1.149e-115	0.62
EO	c1(cc(c2c(c1)O[C@@H]([C@H](C2)O)c1cc(c(cc1)O)O)O)O	Catechin	ZWF1	Glucose-6-phosphate 1-dehydrogenase	1.385e-107	0.6
EO	c1(cc(c2c(c1)O[C@@H]([C@@H](C2)O)c1cc(c(cc1)O)O)O)O	Epicatechin	ZWF1	Glucose-6-phosphate 1-dehydrogenase	1.385e-107	0.6
EO	c1(cc(c2c(c1)O[C@@H]([C@@H](C2)OC(=O)c1cc(c(c(c1)O)O)O)c1cc(c(c(c1)O)O)O)O)O	Epigallocatechin gallate	ZWF1	Glucose-6-phosphate 1-dehydrogenase	2.078e-185	1
CL	C1[C@H](C[C@@H]2[C@](C1)([C@@H]1[C@@H]([C@@H](C2)O)[C@H]2[C@]([C@H](C1)O)([C@H](CC2)[C@@H](CCC(=O)NCC(=O)O)C)C)C)O	Glycocholic acid	ABCB11	Bile salt export pump	2.067e-31	0.8
CL	CC(CCC(=O)NCCS(=O)(=O)O)C1CCC2C1(CCC3C2C(CC4C3(CCC(C4)O)C)O)C	Tauroursodeoxycholic acid	ABCB11	Bile salt export pump	3.439e-29	0.74
CL	CC(CCC(=O)NCCS(=O)(=O)O)C1CCC2C1(CCC3C2C(CC4C3(CCC(C4)O)C)O)C	Tauroursodeoxycholic acid	ABCC4	Multidrug resistance-associated protein 4	1.31e-49	0.62
CL	COC1=C(C=CC(=C1)C=CC=CC(=O)C=CC2=CC(=C(C=C2)O)OC)O	1,7-bis(4-hydroxy-3-methoxyphenyl)-1,4,6-heptatrien-3-one	ache	Acetylcholinesterase	4.929e-14	0.65
CL	c1c(c(cc(c1)/C=C/C(=O)COC(=O)/C=C/c1cc(c(cc1)O)OC)OC)O	Calebin A	ache	Acetylcholinesterase	2.709e-14	0.6
CL	c1(c(ccc(c1)/C=C/C(=O)/C=C(/C=C/c1ccc(c(c1)OC)O)\O)O)OC	Curcumin	ache	Acetylcholinesterase	9.548e-15	0.65
CL	c1c(c(cc(c1)/C=C/C(=O)CC(=O)/C=C/c1ccc(cc1)O)OC)O	Demethoxycurcumin	ache	Acetylcholinesterase	8.436e-28	0.63
CL	COC1=C(C=CC(=C1)C=CC(=O)C=CC2=CC(=C(C=C2)O)OC)O	Go-Y022	ache	Acetylcholinesterase	7.431e-18	0.74
CL	C1=CC(=CC=C1CCC(=O)CC(=O)CCC2=CC=C(C=C2)O)O	Tetrahydrobisdemethoxycurcumin	ache	Acetylcholinesterase	0.06475	1
CL	C(C(=O)/C=C/c1ccc(cc1)O)C(=O)/C=C/c1ccc(cc1)O	bis-(4-hydroxycinnamoyl)methane	AKR1B1	Aldo-keto reductase family 1 member B1	4.441e-15	1
CL	c1c(ccc(c1)/C=C/C(=O)CC(=O)/C=C/c1ccc(cc1)O)O	Bisdemethoxycurcumin	AKR1B1	Aldo-keto reductase family 1 member B1	4.441e-15	1
CL	c1c(c(cc(c1)/C=C/C(=O)CC(=O)/C=C/c1ccc(cc1)O)OC)O	Demethoxycurcumin	AKR1B1	Aldo-keto reductase family 1 member B1	1.554e-15	0.63
CL	C(C(=O)/C=C/c1ccc(cc1)O)C(=O)/C=C/c1ccc(cc1)O	bis-(4-hydroxycinnamoyl)methane	AKR1B10	Aldo-keto reductase family 1 member B10	1.189e-28	1
CL	c1c(ccc(c1)/C=C/C(=O)CC(=O)/C=C/c1ccc(cc1)O)O	Bisdemethoxycurcumin	AKR1B10	Aldo-keto reductase family 1 member B10	1.189e-28	1
CL	c1c(c(cc(c1)/C=C/C(=O)CC(=O)/C=C/c1ccc(cc1)O)OC)O	Demethoxycurcumin	AKR1B10	Aldo-keto reductase family 1 member B10	2.229e-45	0.63
CL	c1c(c(cc(c1)/C=C/C(=O)COC(=O)/C=C/c1cc(c(cc1)O)OC)OC)O	Calebin A	ALOX15	Arachidonate 15-lipoxygenase	3.29e-07	0.74
CL	c1c(c(cc(c1)/C=C/C(=O)CC(=O)/C=C/c1ccc(cc1)O)OC)O	Demethoxycurcumin	ALOX15	Arachidonate 15-lipoxygenase	2.117e-09	0.89
CL	COC1=C(C=CC(=C1)CCC(=O)CC(=O)C=CC2=CC(=C(C=C2)O)OC)O	dihydrocurcumin	ALOX15	Arachidonate 15-lipoxygenase	3.259e-07	0.74
CL	COC1=C(C=CC(=C1)C=CC(=O)C=CC2=CC(=C(C=C2)O)OC)O	Go-Y022	ALOX15	Arachidonate 15-lipoxygenase	3.355e-06	0.79
CL	COC1=C(C=CC(=C1)C=CC(=O)C=CC2=CC(=C(C=C2)O)OC)O	Go-Y022	ALOX15	Arachidonate 15-lipoxygenase	3.618e-09	0.76
CL	c1(c(cc(cc1)CCC(=O)/C=C(/C=C/c1cc(c(cc1)O)OC)\O)OC)O	Letestuianin B	ALOX15	Arachidonate 15-lipoxygenase	6.473e-07	0.62
CL	COC1=C(C=CC(=C1)C=CC=CC(=O)C=CC2=CC(=C(C=C2)O)OC)O	1,7-bis(4-hydroxy-3-methoxyphenyl)-1,4,6-heptatrien-3-one	ALOX5	Arachidonate 5-lipoxygenase	4.517e-12	0.85
CL	COC1=C(C=CC(=C1)C=CC=CC(=O)C=CC2=CC(=C(C=C2)O)OC)O	1,7-bis(4-hydroxy-3-methoxyphenyl)-1,4,6-heptatrien-3-one	Alox5	Arachidonate 5-lipoxygenase	5.29e-39	0.6
CL	COC1=C(C=CC(=C1)CCC(=O)CC(=O)CCC2=CC(=C(C=C2)O)OC)O	1,7-Bis(4-hydroxy-3-methoxyphenyl)-3,5-heptanedione	ALOX5	Arachidonate 5-lipoxygenase	4.191e-10	1
CL	c1c(c(cc(c1)/C=C/C(=O)COC(=O)/C=C/c1cc(c(cc1)O)OC)OC)O	Calebin A	ALOX5	Arachidonate 5-lipoxygenase	1.332e-15	0.74
CL	c1c(c(cc(c1)/C=C/C(=O)COC(=O)/C=C/c1cc(c(cc1)O)OC)OC)O	Calebin A	Alox5	Arachidonate 5-lipoxygenase	9.044e-40	0.6
CL	c1(c(ccc(c1)/C=C/C(=O)/C=C(/C=C/c1ccc(c(c1)OC)O)\O)O)OC	Curcumin	ALOX5	Arachidonate 5-lipoxygenase	4.801e-13	0.8
CL	c1(c(ccc(c1)/C=C/C(=O)/C=C(/C=C/c1ccc(c(c1)OC)O)\O)O)OC	Curcumin	Alox5	Arachidonate 5-lipoxygenase	2.928e-37	0.64
CL	c1c(c(cc(c1)/C=C/C(=O)CC(=O)/C=C/c1ccc(cc1)O)OC)O	Demethoxycurcumin	ALOX5	Arachidonate 5-lipoxygenase	3.458e-17	0.89
CL	COC1=C(C=CC(=C1)CCC(=O)CC(=O)C=CC2=CC(=C(C=C2)O)OC)O	dihydrocurcumin	ALOX5	Arachidonate 5-lipoxygenase	1.403e-12	0.74
CL	COC1=C(C=CC(=C1)C=CC(=O)C=CC2=CC(=C(C=C2)O)OC)O	Go-Y022	ALOX5	Arachidonate 5-lipoxygenase	1.245e-18	1
CL	COC1=C(C=CC(=C1)C=CC(=O)C=CC2=CC(=C(C=C2)O)OC)O	Go-Y022	Alox5	Arachidonate 5-lipoxygenase	4.01e-44	0.68
CL	c1(c(cc(cc1)CCC(=O)/C=C(/C=C/c1cc(c(cc1)O)OC)\O)OC)O	Letestuianin B	ALOX5	Arachidonate 5-lipoxygenase	8.17e-12	0.62
CL	COC1=C(C=CC(=C1)C=CC=CC(=O)C=CC2=CC(=C(C=C2)O)OC)O	1,7-bis(4-hydroxy-3-methoxyphenyl)-1,4,6-heptatrien-3-one	ALPI	Intestinal-type alkaline phosphatase	4.163e-06	0.67
CL	c1c(c(cc(c1)/C=C/C(=O)COC(=O)/C=C/c1cc(c(cc1)O)OC)OC)O	Calebin A	ALPI	Intestinal-type alkaline phosphatase	1.854e-06	0.74
CL	c1(c(ccc(c1)/C=C/C(=O)/C=C(/C=C/c1ccc(c(c1)OC)O)\O)O)OC	Curcumin	ALPI	Intestinal-type alkaline phosphatase	3.109e-06	0.67
CL	c1c(c(cc(c1)/C=C/C(=O)CC(=O)/C=C/c1ccc(cc1)O)OC)O	Demethoxycurcumin	ALPI	Intestinal-type alkaline phosphatase	2.538e-07	0.89
CL	COC1=C(C=CC(=C1)C=CC(=O)C=CC2=CC(=C(C=C2)O)OC)O	Go-Y022	ALPI	Intestinal-type alkaline phosphatase	7.923e-07	0.76
CL	COC1=C(C=CC(=C1)C=CC=CC(=O)C=CC2=CC(=C(C=C2)O)OC)O	1,7-bis(4-hydroxy-3-methoxyphenyl)-1,4,6-heptatrien-3-one	APP	Amyloid-beta precursor protein	9.129e-70	0.7
CL	C1=CC(=CC=C1C=CC=CC(=O)C=CC2=CC=C(C=C2)O)O	1,7-Bis(4-hydroxyphenyl)-1,4,6-heptatrien-3-one	APP	Amyloid-beta precursor protein	1.11e-16	0.62
CL	c1c(c(cc(c1)/C=C/C(=O)COC(=O)/C=C/c1cc(c(cc1)O)OC)OC)O	Calebin A	APP	Amyloid-beta precursor protein	3.034e-70	0.74
CL	c1(c(ccc(c1)/C=C/C(=O)/C=C(/C=C/c1ccc(c(c1)OC)O)\O)O)OC	Curcumin	APP	Amyloid-beta precursor protein	5.249e-69	0.7
CL	c1c(c(cc(c1)/C=C/C(=O)CC(=O)/C=C/c1ccc(cc1)O)OC)O	Demethoxycurcumin	APP	Amyloid-beta precursor protein	1.943e-87	0.89
CL	COC1=C(C=CC(=C1)CCC(=O)CC(=O)C=CC2=CC(=C(C=C2)O)OC)O	dihydrocurcumin	APP	Amyloid-beta precursor protein	2.371e-57	0.74
CL	COC1=C(C=CC(=C1)C=CC(=O)C=CC2=CC(=C(C=C2)O)OC)O	Go-Y022	APP	Amyloid-beta precursor protein	4.556e-82	0.81
CL	c1(c(cc(cc1)CCC(=O)/C=C(/C=C/c1cc(c(cc1)O)OC)\O)OC)O	Letestuianin B	APP	Amyloid-beta precursor protein	2.899e-56	0.62
CL	COC1=C(C=CC(=C1)C=CC=CC(=O)C=CC2=CC(=C(C=C2)O)OC)O	1,7-bis(4-hydroxy-3-methoxyphenyl)-1,4,6-heptatrien-3-one	BACE1	Beta-secretase 1	5.962e-09	0.67
CL	C(C(=O)/C=C/c1ccc(cc1)O)C(=O)/C=C/c1ccc(cc1)O	bis-(4-hydroxycinnamoyl)methane	BACE1	Beta-secretase 1	4.31e-21	1
CL	c1c(ccc(c1)/C=C/C(=O)CC(=O)/C=C/c1ccc(cc1)O)O	Bisdemethoxycurcumin	BACE1	Beta-secretase 1	4.31e-21	1
CL	c1c(c(cc(c1)/C=C/C(=O)COC(=O)/C=C/c1cc(c(cc1)O)OC)OC)O	Calebin A	BACE1	Beta-secretase 1	7.772e-16	0.74
CL	c1(c(ccc(c1)/C=C/C(=O)/C=C(/C=C/c1ccc(c(c1)OC)O)\O)O)OC	Curcumin	BACE1	Beta-secretase 1	6.212e-09	0.67
CL	c1c(c(cc(c1)/C=C/C(=O)CC(=O)/C=C/c1ccc(cc1)O)OC)O	Demethoxycurcumin	BACE1	Beta-secretase 1	5.697e-22	0.89
CL	COC1=C(C=CC(=C1)CCC(=O)CC(=O)C=CC2=CC(=C(C=C2)O)OC)O	dihydrocurcumin	BACE1	Beta-secretase 1	1.11e-16	0.74
CL	COC1=C(C=CC(=C1)C=CC(=O)C=CC2=CC(=C(C=C2)O)OC)O	Go-Y022	BACE1	Beta-secretase 1	1.117e-10	0.76
CL	c1(c(cc(cc1)CCC(=O)/C=C(/C=C/c1cc(c(cc1)O)OC)\O)OC)O	Letestuianin B	BACE1	Beta-secretase 1	2.184e-10	0.62
CL	C(C(=O)/C=C/c1ccc(cc1)O)C(=O)/C=C/c1ccc(cc1)O	bis-(4-hydroxycinnamoyl)methane	bla(tem-2)	Beta-lactamase	8.157e-09	1
CL	c1c(ccc(c1)/C=C/C(=O)CC(=O)/C=C/c1ccc(cc1)O)O	Bisdemethoxycurcumin	bla(tem-2)	Beta-lactamase	8.157e-09	1
CL	c1c(c(cc(c1)/C=C/C(=O)COC(=O)/C=C/c1cc(c(cc1)O)OC)OC)O	Calebin A	bla(tem-2)	Beta-lactamase	7.474e-06	0.67
CL	c1c(c(cc(c1)/C=C/C(=O)CC(=O)/C=C/c1ccc(cc1)O)OC)O	Demethoxycurcumin	bla(tem-2)	Beta-lactamase	5.359e-09	1
CL	COC1=C(C=CC(=C1)CCC(=O)CC(=O)C=CC2=CC(=C(C=C2)O)OC)O	dihydrocurcumin	bla(tem-2)	Beta-lactamase	9.904e-06	0.67
CL	COC1=C(C=CC(=C1)C=CC(=O)C=CC2=CC(=C(C=C2)O)OC)O	Go-Y022	bla(tem-2)	Beta-lactamase	4.19e-07	0.68
CL	c1(c(cc(cc1)CCC(=O)/C=C(/C=C/c1ccc(cc1)O)\O)OC)O	Letestuianin A	bla(tem-2)	Beta-lactamase	1.935e-06	0.61
CL	COC1=C(C=CC(=C1)C=CC=CC(=O)C=CC2=CC(=C(C=C2)O)OC)O	1,7-bis(4-hydroxy-3-methoxyphenyl)-1,4,6-heptatrien-3-one	CA1	Carbonic anhydrase 1	7.007e-06	0.68
CL	C(C(=O)/C=C/c1ccc(cc1)O)C(=O)/C=C/c1ccc(cc1)O	bis-(4-hydroxycinnamoyl)methane	CA1	Carbonic anhydrase 1	1.987e-08	0.65
CL	c1c(ccc(c1)/C=C/C(=O)CC(=O)/C=C/c1ccc(cc1)O)O	Bisdemethoxycurcumin	CA1	Carbonic anhydrase 1	1.987e-08	0.65
CL	c1c(c(cc(c1)/C=C/C(=O)COC(=O)/C=C/c1cc(c(cc1)O)OC)OC)O	Calebin A	CA1	Carbonic anhydrase 1	5.32e-09	0.74
CL	c1(c(ccc(c1)/C=C/C(=O)/C=C(/C=C/c1ccc(c(c1)OC)O)\O)O)OC	Curcumin	CA1	Carbonic anhydrase 1	5.278e-06	0.73
CL	c1c(c(cc(c1)/C=C/C(=O)CC(=O)/C=C/c1ccc(cc1)O)OC)O	Demethoxycurcumin	CA1	Carbonic anhydrase 1	2.96e-12	0.89
CL	COC1=C(C=CC(=C1)CCC(=O)CC(=O)C=CC2=CC(=C(C=C2)O)OC)O	dihydrocurcumin	CA1	Carbonic anhydrase 1	1.183e-06	0.74
CL	C1[C@H](C[C@@H]2[C@](C1)([C@@H]1[C@@H]([C@@H](C2)O)[C@H]2[C@]([C@H](C1)O)([C@H](CC2)[C@@H](CCC(=O)NCC(=O)O)C)C)C)O	Glycocholic acid	CA1	Carbonic anhydrase 1	3.843e-24	0.68
CL	COC1=C(C=CC(=C1)C=CC(=O)C=CC2=CC(=C(C=C2)O)OC)O	Go-Y022	CA1	Carbonic anhydrase 1	2.131e-09	0.79
CL	CC(CCC(=O)NCCS(=O)(=O)O)C1CCC2C1(CCC3C2C(CC4C3(CCC(C4)O)C)O)C	Tauroursodeoxycholic acid	CA1	Carbonic anhydrase 1	2.528e-27	0.7
CL	COC1=C(C=CC(=C1)C=CC=CC(=O)C=CC2=CC(=C(C=C2)O)OC)O	1,7-bis(4-hydroxy-3-methoxyphenyl)-1,4,6-heptatrien-3-one	CA12	Carbonic anhydrase 12	3.641e-09	0.68
CL	C(C(=O)/C=C/c1ccc(cc1)O)C(=O)/C=C/c1ccc(cc1)O	bis-(4-hydroxycinnamoyl)methane	CA12	Carbonic anhydrase 12	7.048e-10	0.65
CL	c1c(ccc(c1)/C=C/C(=O)CC(=O)/C=C/c1ccc(cc1)O)O	Bisdemethoxycurcumin	CA12	Carbonic anhydrase 12	7.048e-10	0.65
CL	c1c(c(cc(c1)/C=C/C(=O)COC(=O)/C=C/c1cc(c(cc1)O)OC)OC)O	Calebin A	CA12	Carbonic anhydrase 12	9.215e-14	0.74
CL	c1(c(ccc(c1)/C=C/C(=O)/C=C(/C=C/c1ccc(c(c1)OC)O)\O)O)OC	Curcumin	CA12	Carbonic anhydrase 12	1.396e-09	0.73
CL	c1c(c(cc(c1)/C=C/C(=O)CC(=O)/C=C/c1ccc(cc1)O)OC)O	Demethoxycurcumin	CA12	Carbonic anhydrase 12	8.779e-18	0.89
CL	COC1=C(C=CC(=C1)CCC(=O)CC(=O)C=CC2=CC(=C(C=C2)O)OC)O	dihydrocurcumin	CA12	Carbonic anhydrase 12	2.545e-09	0.74
CL	COC1=C(C=CC(=C1)C=CC(=O)C=CC2=CC(=C(C=C2)O)OC)O	Go-Y022	CA12	Carbonic anhydrase 12	1.035e-13	0.79
CL	c1(c(cc(cc1)CCC(=O)/C=C(/C=C/c1cc(c(cc1)O)OC)\O)OC)O	Letestuianin B	CA12	Carbonic anhydrase 12	4.106e-08	0.62
CL	c1c(c(cc(c1)/C=C/C(=O)COC(=O)/C=C/c1cc(c(cc1)O)OC)OC)O	Calebin A	CA13	Carbonic anhydrase 13	1.155e-14	0.74
CL	c1c(c(cc(c1)/C=C/C(=O)COC(=O)/C=C/c1cc(c(cc1)O)OC)OC)O	Calebin A	Ca13	Carbonic anhydrase 13	3.351e-26	0.67
CL	c1c(c(cc(c1)/C=C/C(=O)CC(=O)/C=C/c1ccc(cc1)O)OC)O	Demethoxycurcumin	CA13	Carbonic anhydrase 13	3.344e-20	0.89
CL	c1c(c(cc(c1)/C=C/C(=O)CC(=O)/C=C/c1ccc(cc1)O)OC)O	Demethoxycurcumin	Ca13	Carbonic anhydrase 13	1.367e-24	0.64
CL	COC1=C(C=CC(=C1)CCC(=O)CC(=O)C=CC2=CC(=C(C=C2)O)OC)O	dihydrocurcumin	CA13	Carbonic anhydrase 13	8.482e-08	0.74
CL	COC1=C(C=CC(=C1)C=CC(=O)C=CC2=CC(=C(C=C2)O)OC)O	Go-Y022	CA13	Carbonic anhydrase 13	6.962e-12	0.76
CL	COC1=C(C=CC(=C1)C=CC(=O)C=CC2=CC(=C(C=C2)O)OC)O	Go-Y022	Ca13	Carbonic anhydrase 13	3.602e-25	0.6
CL	COC1=C(C=CC(=C1)C=CC=CC(=O)C=CC2=CC(=C(C=C2)O)OC)O	1,7-bis(4-hydroxy-3-methoxyphenyl)-1,4,6-heptatrien-3-one	CA14	Carbonic anhydrase 14	2.139e-13	0.68
CL	C(C(=O)/C=C/c1ccc(cc1)O)C(=O)/C=C/c1ccc(cc1)O	bis-(4-hydroxycinnamoyl)methane	CA14	Carbonic anhydrase 14	3.273e-21	0.65
CL	c1c(ccc(c1)/C=C/C(=O)CC(=O)/C=C/c1ccc(cc1)O)O	Bisdemethoxycurcumin	CA14	Carbonic anhydrase 14	3.273e-21	0.65
CL	c1c(c(cc(c1)/C=C/C(=O)COC(=O)/C=C/c1cc(c(cc1)O)OC)OC)O	Calebin A	CA14	Carbonic anhydrase 14	1.717e-19	0.67
CL	c1(c(ccc(c1)/C=C/C(=O)/C=C(/C=C/c1ccc(c(c1)OC)O)\O)O)OC	Curcumin	CA14	Carbonic anhydrase 14	3.664e-15	0.73
CL	c1c(c(cc(c1)/C=C/C(=O)CC(=O)/C=C/c1ccc(cc1)O)OC)O	Demethoxycurcumin	CA14	Carbonic anhydrase 14	3.531e-29	0.67
CL	COC1=C(C=CC(=C1)C=CC(=O)C=CC2=CC(=C(C=C2)O)OC)O	Go-Y022	CA14	Carbonic anhydrase 14	4.07e-21	0.79
CL	c1(c(cc(cc1)CCC(=O)/C=C(/C=C/c1cc(c(cc1)O)OC)\O)OC)O	Letestuianin B	CA14	Carbonic anhydrase 14	7.739e-13	0.6
CL	c1c(c(cc(c1)/C=C/C(=O)COC(=O)/C=C/c1cc(c(cc1)O)OC)OC)O	Calebin A	Ca15	Carbonic anhydrase 15	4.894e-06	0.74
CL	c1(c(ccc(c1)/C=C/C(=O)/C=C(/C=C/c1ccc(c(c1)OC)O)\O)O)OC	Curcumin	Ca15	Carbonic anhydrase 15	1.503e-07	0.67
CL	c1c(c(cc(c1)/C=C/C(=O)CC(=O)/C=C/c1ccc(cc1)O)OC)O	Demethoxycurcumin	Ca15	Carbonic anhydrase 15	2.343e-14	0.89
CL	COC1=C(C=CC(=C1)CCC(=O)CC(=O)C=CC2=CC(=C(C=C2)O)OC)O	dihydrocurcumin	Ca15	Carbonic anhydrase 15	5.37e-06	0.74
CL	COC1=C(C=CC(=C1)C=CC(=O)C=CC2=CC(=C(C=C2)O)OC)O	Go-Y022	Ca15	Carbonic anhydrase 15	1.801e-10	0.76
CL	C(C(=O)/C=C/c1ccc(cc1)O)C(=O)/C=C/c1ccc(cc1)O	bis-(4-hydroxycinnamoyl)methane	CA2	Carbonic anhydrase 2	2.912e-07	0.65
CL	c1c(ccc(c1)/C=C/C(=O)CC(=O)/C=C/c1ccc(cc1)O)O	Bisdemethoxycurcumin	CA2	Carbonic anhydrase 2	2.912e-07	0.65
CL	c1c(c(cc(c1)/C=C/C(=O)COC(=O)/C=C/c1cc(c(cc1)O)OC)OC)O	Calebin A	CA2	Carbonic anhydrase 2	2.569e-07	0.74
CL	c1c(c(cc(c1)/C=C/C(=O)CC(=O)/C=C/c1ccc(cc1)O)OC)O	Demethoxycurcumin	CA2	Carbonic anhydrase 2	4.474e-10	0.89
CL	C1[C@H](C[C@@H]2[C@](C1)([C@@H]1[C@@H]([C@@H](C2)O)[C@H]2[C@]([C@H](C1)O)([C@H](CC2)[C@@H](CCC(=O)NCC(=O)O)C)C)C)O	Glycocholic acid	CA2	Carbonic anhydrase 2	5.937e-25	0.68
CL	COC1=C(C=CC(=C1)C=CC(=O)C=CC2=CC(=C(C=C2)O)OC)O	Go-Y022	CA2	Carbonic anhydrase 2	1.447e-07	0.79
CL	CC(CCC(=O)NCCS(=O)(=O)O)C1CCC2C1(CCC3C2C(CC4C3(CCC(C4)O)C)O)C	Tauroursodeoxycholic acid	CA2	Carbonic anhydrase 2	1.043e-27	0.7
CL	C(C(=O)/C=C/c1ccc(cc1)O)C(=O)/C=C/c1ccc(cc1)O	bis-(4-hydroxycinnamoyl)methane	CA3	Carbonic anhydrase 3	3.009e-25	0.65
CL	c1c(ccc(c1)/C=C/C(=O)CC(=O)/C=C/c1ccc(cc1)O)O	Bisdemethoxycurcumin	CA3	Carbonic anhydrase 3	3.009e-25	0.65
CL	COC1=C(C=CC(=C1)C=CC=CC(=O)C=CC2=CC(=C(C=C2)O)OC)O	1,7-bis(4-hydroxy-3-methoxyphenyl)-1,4,6-heptatrien-3-one	CA4	Carbonic anhydrase 4	9.427e-06	0.67
CL	C(C(=O)/C=C/c1ccc(cc1)O)C(=O)/C=C/c1ccc(cc1)O	bis-(4-hydroxycinnamoyl)methane	CA4	Carbonic anhydrase 4	1.305e-13	0.65
CL	c1c(ccc(c1)/C=C/C(=O)CC(=O)/C=C/c1ccc(cc1)O)O	Bisdemethoxycurcumin	CA4	Carbonic anhydrase 4	1.305e-13	0.65
CL	c1c(c(cc(c1)/C=C/C(=O)COC(=O)/C=C/c1cc(c(cc1)O)OC)OC)O	Calebin A	CA4	Carbonic anhydrase 4	1.221e-15	0.74
CL	c1(c(ccc(c1)/C=C/C(=O)/C=C(/C=C/c1ccc(c(c1)OC)O)\O)O)OC	Curcumin	CA4	Carbonic anhydrase 4	1.109e-06	0.67
CL	c1c(c(cc(c1)/C=C/C(=O)CC(=O)/C=C/c1ccc(cc1)O)OC)O	Demethoxycurcumin	CA4	Carbonic anhydrase 4	3.532e-18	0.89
CL	COC1=C(C=CC(=C1)CCC(=O)CC(=O)C=CC2=CC(=C(C=C2)O)OC)O	dihydrocurcumin	CA4	Carbonic anhydrase 4	1.474e-08	0.74
CL	C1[C@H](C[C@@H]2[C@](C1)([C@@H]1[C@@H]([C@@H](C2)O)[C@H]2[C@]([C@H](C1)O)([C@H](CC2)[C@@H](CCC(=O)NCC(=O)O)C)C)C)O	Glycocholic acid	CA4	Carbonic anhydrase 4	6.798e-67	0.68
CL	COC1=C(C=CC(=C1)C=CC(=O)C=CC2=CC(=C(C=C2)O)OC)O	Go-Y022	CA4	Carbonic anhydrase 4	1.236e-09	0.76
CL	c1(c(cc(cc1)CCC(=O)/C=C(/C=C/c1cc(c(cc1)O)OC)\O)OC)O	Letestuianin B	CA4	Carbonic anhydrase 4	1.375e-06	0.62
CL	CC(CCC(=O)NCCS(=O)(=O)O)C1CCC2C1(CCC3C2C(CC4C3(CCC(C4)O)C)O)C	Tauroursodeoxycholic acid	CA4	Carbonic anhydrase 4	4.438e-74	0.7
CL	COC1=C(C=CC(=C1)C=CC=CC(=O)C=CC2=CC(=C(C=C2)O)OC)O	1,7-bis(4-hydroxy-3-methoxyphenyl)-1,4,6-heptatrien-3-one	CA5A	Carbonic anhydrase 5A, mitochondrial	2.442e-14	0.68
CL	C(C(=O)/C=C/c1ccc(cc1)O)C(=O)/C=C/c1ccc(cc1)O	bis-(4-hydroxycinnamoyl)methane	CA5A	Carbonic anhydrase 5A, mitochondrial	4.095e-28	0.65
CL	c1c(ccc(c1)/C=C/C(=O)CC(=O)/C=C/c1ccc(cc1)O)O	Bisdemethoxycurcumin	CA5A	Carbonic anhydrase 5A, mitochondrial	4.095e-28	0.65
CL	c1c(c(cc(c1)/C=C/C(=O)COC(=O)/C=C/c1cc(c(cc1)O)OC)OC)O	Calebin A	CA5A	Carbonic anhydrase 5A, mitochondrial	1.994e-28	0.67
CL	c1(c(ccc(c1)/C=C/C(=O)/C=C(/C=C/c1ccc(c(c1)OC)O)\O)O)OC	Curcumin	CA5A	Carbonic anhydrase 5A, mitochondrial	1.11e-16	0.73
CL	c1c(c(cc(c1)/C=C/C(=O)CC(=O)/C=C/c1ccc(cc1)O)OC)O	Demethoxycurcumin	CA5A	Carbonic anhydrase 5A, mitochondrial	4.205e-32	0.67
CL	COC1=C(C=CC(=C1)C=CC(=O)C=CC2=CC(=C(C=C2)O)OC)O	Go-Y022	CA5A	Carbonic anhydrase 5A, mitochondrial	6.404e-23	0.79
CL	c1(c(cc(cc1)CCC(=O)/C=C(/C=C/c1cc(c(cc1)O)OC)\O)OC)O	Letestuianin B	CA5A	Carbonic anhydrase 5A, mitochondrial	1.195e-17	0.6
CL	COC1=C(C=CC(=C1)C=CC=CC(=O)C=CC2=CC(=C(C=C2)O)OC)O	1,7-bis(4-hydroxy-3-methoxyphenyl)-1,4,6-heptatrien-3-one	CA5B	Carbonic anhydrase 5B, mitochondrial	2.076e-14	0.67
CL	C(C(=O)/C=C/c1ccc(cc1)O)C(=O)/C=C/c1ccc(cc1)O	bis-(4-hydroxycinnamoyl)methane	CA5B	Carbonic anhydrase 5B, mitochondrial	6.677e-27	0.65
CL	c1c(ccc(c1)/C=C/C(=O)CC(=O)/C=C/c1ccc(cc1)O)O	Bisdemethoxycurcumin	CA5B	Carbonic anhydrase 5B, mitochondrial	6.677e-27	0.65
CL	c1c(c(cc(c1)/C=C/C(=O)COC(=O)/C=C/c1cc(c(cc1)O)OC)OC)O	Calebin A	CA5B	Carbonic anhydrase 5B, mitochondrial	7.843e-27	0.74
CL	c1(c(ccc(c1)/C=C/C(=O)/C=C(/C=C/c1ccc(c(c1)OC)O)\O)O)OC	Curcumin	CA5B	Carbonic anhydrase 5B, mitochondrial	5.551e-16	0.67
CL	c1c(c(cc(c1)/C=C/C(=O)CC(=O)/C=C/c1ccc(cc1)O)OC)O	Demethoxycurcumin	CA5B	Carbonic anhydrase 5B, mitochondrial	1.935e-30	0.89
CL	COC1=C(C=CC(=C1)CCC(=O)CC(=O)C=CC2=CC(=C(C=C2)O)OC)O	dihydrocurcumin	CA5B	Carbonic anhydrase 5B, mitochondrial	1.139e-19	0.74
CL	COC1=C(C=CC(=C1)C=CC(=O)C=CC2=CC(=C(C=C2)O)OC)O	Go-Y022	CA5B	Carbonic anhydrase 5B, mitochondrial	4.332e-23	0.76
CL	c1(c(cc(cc1)CCC(=O)/C=C(/C=C/c1cc(c(cc1)O)OC)\O)OC)O	Letestuianin B	CA5B	Carbonic anhydrase 5B, mitochondrial	2.228e-18	0.62
CL	COC1=C(C=CC(=C1)C=CC=CC(=O)C=CC2=CC(=C(C=C2)O)OC)O	1,7-bis(4-hydroxy-3-methoxyphenyl)-1,4,6-heptatrien-3-one	CA6	Carbonic anhydrase 6	1.01e-17	0.68
CL	C(C(=O)/C=C/c1ccc(cc1)O)C(=O)/C=C/c1ccc(cc1)O	bis-(4-hydroxycinnamoyl)methane	CA6	Carbonic anhydrase 6	1.22e-28	0.65
CL	c1c(ccc(c1)/C=C/C(=O)CC(=O)/C=C/c1ccc(cc1)O)O	Bisdemethoxycurcumin	CA6	Carbonic anhydrase 6	1.22e-28	0.65
CL	c1c(c(cc(c1)/C=C/C(=O)COC(=O)/C=C/c1cc(c(cc1)O)OC)OC)O	Calebin A	CA6	Carbonic anhydrase 6	1.213e-30	0.74
CL	c1(c(ccc(c1)/C=C/C(=O)/C=C(/C=C/c1ccc(c(c1)OC)O)\O)O)OC	Curcumin	CA6	Carbonic anhydrase 6	1.512e-19	0.73
CL	c1c(c(cc(c1)/C=C/C(=O)CC(=O)/C=C/c1ccc(cc1)O)OC)O	Demethoxycurcumin	CA6	Carbonic anhydrase 6	1.944e-34	0.89
CL	COC1=C(C=CC(=C1)CCC(=O)CC(=O)C=CC2=CC(=C(C=C2)O)OC)O	dihydrocurcumin	CA6	Carbonic anhydrase 6	2.821e-22	0.74
CL	COC1=C(C=CC(=C1)C=CC(=O)C=CC2=CC(=C(C=C2)O)OC)O	Go-Y022	CA6	Carbonic anhydrase 6	1.138e-26	0.79
CL	c1(c(cc(cc1)CCC(=O)/C=C(/C=C/c1cc(c(cc1)O)OC)\O)OC)O	Letestuianin B	CA6	Carbonic anhydrase 6	4.4e-20	0.62
CL	COC1=C(C=CC(=C1)C=CC=CC(=O)C=CC2=CC(=C(C=C2)O)OC)O	1,7-bis(4-hydroxy-3-methoxyphenyl)-1,4,6-heptatrien-3-one	CA7	Carbonic anhydrase 7	3.164e-14	0.68
CL	C(C(=O)/C=C/c1ccc(cc1)O)C(=O)/C=C/c1ccc(cc1)O	bis-(4-hydroxycinnamoyl)methane	CA7	Carbonic anhydrase 7	9.352e-22	0.65
CL	c1c(ccc(c1)/C=C/C(=O)CC(=O)/C=C/c1ccc(cc1)O)O	Bisdemethoxycurcumin	CA7	Carbonic anhydrase 7	9.352e-22	0.65
CL	c1c(c(cc(c1)/C=C/C(=O)COC(=O)/C=C/c1cc(c(cc1)O)OC)OC)O	Calebin A	CA7	Carbonic anhydrase 7	1.326e-21	0.74
CL	c1(c(ccc(c1)/C=C/C(=O)/C=C(/C=C/c1ccc(c(c1)OC)O)\O)O)OC	Curcumin	CA7	Carbonic anhydrase 7	9.992e-16	0.73
CL	c1c(c(cc(c1)/C=C/C(=O)CC(=O)/C=C/c1ccc(cc1)O)OC)O	Demethoxycurcumin	CA7	Carbonic anhydrase 7	5.014e-32	0.89
CL	COC1=C(C=CC(=C1)CCC(=O)CC(=O)C=CC2=CC(=C(C=C2)O)OC)O	dihydrocurcumin	CA7	Carbonic anhydrase 7	4.489e-13	0.74
CL	COC1=C(C=CC(=C1)C=CC(=O)C=CC2=CC(=C(C=C2)O)OC)O	Go-Y022	CA7	Carbonic anhydrase 7	9.575e-22	0.79
CL	c1(c(cc(cc1)CCC(=O)/C=C(/C=C/c1cc(c(cc1)O)OC)\O)OC)O	Letestuianin B	CA7	Carbonic anhydrase 7	1.677e-11	0.62
CL	COC1=C(C=CC(=C1)C=CC=CC(=O)C=CC2=CC(=C(C=C2)O)OC)O	1,7-bis(4-hydroxy-3-methoxyphenyl)-1,4,6-heptatrien-3-one	CA9	Carbonic anhydrase 9	1.341e-08	0.68
CL	C(C(=O)/C=C/c1ccc(cc1)O)C(=O)/C=C/c1ccc(cc1)O	bis-(4-hydroxycinnamoyl)methane	CA9	Carbonic anhydrase 9	2.907e-09	0.65
CL	c1c(ccc(c1)/C=C/C(=O)CC(=O)/C=C/c1ccc(cc1)O)O	Bisdemethoxycurcumin	CA9	Carbonic anhydrase 9	2.907e-09	0.65
CL	c1c(c(cc(c1)/C=C/C(=O)COC(=O)/C=C/c1cc(c(cc1)O)OC)OC)O	Calebin A	CA9	Carbonic anhydrase 9	2.37e-12	0.74
CL	c1(c(ccc(c1)/C=C/C(=O)/C=C(/C=C/c1ccc(c(c1)OC)O)\O)O)OC	Curcumin	CA9	Carbonic anhydrase 9	5.752e-09	0.73
CL	c1c(c(cc(c1)/C=C/C(=O)CC(=O)/C=C/c1ccc(cc1)O)OC)O	Demethoxycurcumin	CA9	Carbonic anhydrase 9	2.22e-16	0.89
CL	COC1=C(C=CC(=C1)CCC(=O)CC(=O)C=CC2=CC(=C(C=C2)O)OC)O	dihydrocurcumin	CA9	Carbonic anhydrase 9	2.02e-09	0.74
CL	COC1=C(C=CC(=C1)C=CC(=O)C=CC2=CC(=C(C=C2)O)OC)O	Go-Y022	CA9	Carbonic anhydrase 9	4.816e-13	0.79
CL	c1(c(cc(cc1)CCC(=O)/C=C(/C=C/c1cc(c(cc1)O)OC)\O)OC)O	Letestuianin B	CA9	Carbonic anhydrase 9	3.573e-08	0.62
CL	CC(=O)CCCCCCCCC	2-Undecanone	CES1	Liver carboxylesterase 1	1.056e-41	0.65
CL	C(=O)(O)CCCCCCCCCCCCCCCCCCC	Arachidic acid	CES1	Liver carboxylesterase 1	4.151e-41	0.65
CL	NC(=O)CCCCCCCCCCCCCCCCC	Octadecanamide	CES1	Liver carboxylesterase 1	1.014e-39	0.65
CL	CC(=O)CCCCCCCCC	2-Undecanone	CES2	Cocaine esterase	4.728e-47	0.65
CL	C(=O)(O)CCCCCCCCCCCCCCCCCCC	Arachidic acid	CES2	Cocaine esterase	3.256e-49	0.65
CL	NC(=O)CCCCCCCCCCCCCCCCC	Octadecanamide	CES2	Cocaine esterase	4.728e-47	0.65
CL	C1[C@H](C[C@@H]2[C@](C1)([C@@H]1[C@@H]([C@@H](C2)O)[C@H]2[C@]([C@H](C1)O)([C@H](CC2)[C@@H](CCC(=O)NCC(=O)O)C)C)C)O	Glycocholic acid	CISD1	CDGSH iron-sulfur domain-containing protein 1	4.355e-06	0.65
CL	CC(CCC(=O)NCCS(=O)(=O)O)C1CCC2C1(CCC3C2C(CC4C3(CCC(C4)O)C)O)C	Tauroursodeoxycholic acid	CISD1	CDGSH iron-sulfur domain-containing protein 1	1.49e-06	0.7
CL	NC(=O)CCCCCCCCCCCCCCCCC	Octadecanamide	Cnr1	Cannabinoid receptor 1	9.992e-16	0.74
CL	COC1=C(C=CC(=C1)C=CC=CC(=O)C=CC2=CC(=C(C=C2)O)OC)O	1,7-bis(4-hydroxy-3-methoxyphenyl)-1,4,6-heptatrien-3-one	CXCL12	Stromal cell-derived factor 1	1.057e-154	0.62
CL	c1(c(ccc(c1)/C=C/C(=O)/C=C(/C=C/c1ccc(c(c1)OC)O)\O)O)OC	Curcumin	CXCL12	Stromal cell-derived factor 1	1.621e-153	0.63
CL	COC1=C(C=CC(=C1)C=CC(=O)C=CC2=CC(=C(C=C2)O)OC)O	Go-Y022	CXCL12	Stromal cell-derived factor 1	7.153e-182	0.67
CL	C1CCN(CC1)C(=O)C=CC=CC2=CC3=C(C=C2)OCO3	piperine	CYP1A2	Cytochrome P450 1A2	0.0001451	1
CL	[C@@H]([C@@H](N)CO)(O)CCCCCCCCCCCCCCC	Sphinganine	CYP2D6	Cytochrome P450 2D6	0.7197	1
CL	C1CCN(CC1)C(=O)C=CC=CC2=CC3=C(C=C2)OCO3	piperine	CYP3A4	Cytochrome P450 3A4	1.87e-07	1
CL	CC(CCC(=O)NCCS(=O)(=O)O)C1CCC2C1(CCC3C2C(CC4C3(CCC(C4)O)C)O)C	Tauroursodeoxycholic acid	ENPP2	Ectonucleotide pyrophosphatase/phosphodiesterase family member 2	1.11e-16	0.64
CL	COC1=C(C=CC(=C1)C=CC=CC(=O)C=CC2=CC(=C(C=C2)O)OC)O	1,7-bis(4-hydroxy-3-methoxyphenyl)-1,4,6-heptatrien-3-one	EP300	Histone acetyltransferase p300	2.12e-11	0.67
CL	c1c(c(cc(c1)/C=C/C(=O)COC(=O)/C=C/c1cc(c(cc1)O)OC)OC)O	Calebin A	EP300	Histone acetyltransferase p300	5.527e-12	0.74
CL	c1(c(ccc(c1)/C=C/C(=O)/C=C(/C=C/c1ccc(c(c1)OC)O)\O)O)OC	Curcumin	EP300	Histone acetyltransferase p300	3.611e-12	0.67
CL	c1c(c(cc(c1)/C=C/C(=O)CC(=O)/C=C/c1ccc(cc1)O)OC)O	Demethoxycurcumin	EP300	Histone acetyltransferase p300	4.011e-13	0.89
CL	COC1=C(C=CC(=C1)CCC(=O)CC(=O)C=CC2=CC(=C(C=C2)O)OC)O	dihydrocurcumin	EP300	Histone acetyltransferase p300	1.121e-11	0.74
CL	COC1=C(C=CC(=C1)C=CC(=O)C=CC2=CC(=C(C=C2)O)OC)O	Go-Y022	EP300	Histone acetyltransferase p300	1.144e-12	0.76
CL	c1(c(cc(cc1)CCC(=O)/C=C(/C=C/c1cc(c(cc1)O)OC)\O)OC)O	Letestuianin B	EP300	Histone acetyltransferase p300	1.246e-11	0.62
CL	C(C(=O)/C=C/c1ccc(cc1)O)C(=O)/C=C/c1ccc(cc1)O	bis-(4-hydroxycinnamoyl)methane	ESR2	Estrogen receptor beta	9.351e-09	0.65
CL	c1c(ccc(c1)/C=C/C(=O)CC(=O)/C=C/c1ccc(cc1)O)O	Bisdemethoxycurcumin	ESR2	Estrogen receptor beta	9.351e-09	0.65
CL	COC1=C(C=CC(=C1)C=CC=CC(=O)C=CC2=CC(=C(C=C2)O)OC)O	1,7-bis(4-hydroxy-3-methoxyphenyl)-1,4,6-heptatrien-3-one	F3	Tissue factor	2.169e-07	0.67
CL	C1=CC(=CC=C1C=CC=CC(=O)C=CC2=CC=C(C=C2)O)O	1,7-Bis(4-hydroxyphenyl)-1,4,6-heptatrien-3-one	F3	Tissue factor	2.29e-09	0.8
CL	C(C(=O)/C=C/c1ccc(cc1)O)C(=O)/C=C/c1ccc(cc1)O	bis-(4-hydroxycinnamoyl)methane	F3	Tissue factor	7.591e-10	0.68
CL	c1c(ccc(c1)/C=C/C(=O)CC(=O)/C=C/c1ccc(cc1)O)O	Bisdemethoxycurcumin	F3	Tissue factor	7.591e-10	0.68
CL	c1c(c(cc(c1)/C=C/C(=O)COC(=O)/C=C/c1cc(c(cc1)O)OC)OC)O	Calebin A	F3	Tissue factor	4.047e-06	0.74
CL	c1(c(ccc(c1)/C=C/C(=O)/C=C(/C=C/c1ccc(c(c1)OC)O)\O)O)OC	Curcumin	F3	Tissue factor	1.809e-06	0.67
CL	c1c(c(cc(c1)/C=C/C(=O)CC(=O)/C=C/c1ccc(cc1)O)OC)O	Demethoxycurcumin	F3	Tissue factor	1.46e-08	0.89
CL	COC1=C(C=CC(=C1)C=CC(=O)C=CC2=CC(=C(C=C2)O)OC)O	Go-Y022	F3	Tissue factor	3.091e-08	0.76
CL	C(=O)CCCCCCCCCCCCCCC	Palmitaldehyde	FAAH	Fatty-acid amide hydrolase 1	1.11e-16	0.84
CL	C(=O)(O)CCCCCCCCCCCCCCCCCCC	Arachidic acid	FABP3	Fatty acid-binding protein, heart	1.457e-22	0.74
CL	C(=O)(O)CCCCCCCCCCCCCCCCCCC	Arachidic acid	FFAR4	Free fatty acid receptor 4	1.248e-06	0.71
CL	COC1=C(C=CC(=C1)C=CC=CC(=O)C=CC2=CC(=C(C=C2)O)OC)O	1,7-bis(4-hydroxy-3-methoxyphenyl)-1,4,6-heptatrien-3-one	FOS	Proto-oncogene c-Fos	1.11e-16	0.67
CL	C(C(=O)/C=C/c1ccc(cc1)O)C(=O)/C=C/c1ccc(cc1)O	bis-(4-hydroxycinnamoyl)methane	FOS	Proto-oncogene c-Fos	2.22e-16	0.67
CL	c1c(ccc(c1)/C=C/C(=O)CC(=O)/C=C/c1ccc(cc1)O)O	Bisdemethoxycurcumin	FOS	Proto-oncogene c-Fos	2.22e-16	0.67
CL	c1c(c(cc(c1)/C=C/C(=O)COC(=O)/C=C/c1cc(c(cc1)O)OC)OC)O	Calebin A	FOS	Proto-oncogene c-Fos	5.34e-19	0.74
CL	c1(c(ccc(c1)/C=C/C(=O)/C=C(/C=C/c1ccc(c(c1)OC)O)\O)O)OC	Curcumin	FOS	Proto-oncogene c-Fos	1.11e-16	0.67
CL	c1c(c(cc(c1)/C=C/C(=O)CC(=O)/C=C/c1ccc(cc1)O)OC)O	Demethoxycurcumin	FOS	Proto-oncogene c-Fos	1.451e-22	0.89
CL	COC1=C(C=CC(=C1)CCC(=O)CC(=O)C=CC2=CC(=C(C=C2)O)OC)O	dihydrocurcumin	FOS	Proto-oncogene c-Fos	1.006e-19	0.74
CL	COC1=C(C=CC(=C1)C=CC(=O)C=CC2=CC(=C(C=C2)O)OC)O	Go-Y022	FOS	Proto-oncogene c-Fos	4.432e-19	0.76
CL	c1(c(cc(cc1)CCC(=O)/C=C(/C=C/c1cc(c(cc1)O)OC)\O)OC)O	Letestuianin B	FOS	Proto-oncogene c-Fos	5.254e-17	0.62
CL	CC(C)CCCC(C)C1CCC2C1(CCC3C2CC=C4C3(CCC(C4)OS(=O)(=O)O)C)C	Cholesterol sulfate	GBA2	Non-lysosomal glucosylceramidase	2.143e-07	0.62
CL	COC1=C(C=CC(=C1)C=CC=CC(=O)C=CC2=CC(=C(C=C2)O)OC)O	1,7-bis(4-hydroxy-3-methoxyphenyl)-1,4,6-heptatrien-3-one	GLO1	Lactoylglutathione lyase	4.641e-37	0.67
CL	C(C(=O)/C=C/c1ccc(cc1)O)C(=O)/C=C/c1ccc(cc1)O	bis-(4-hydroxycinnamoyl)methane	GLO1	Lactoylglutathione lyase	3.684e-21	0.67
CL	c1c(ccc(c1)/C=C/C(=O)CC(=O)/C=C/c1ccc(cc1)O)O	Bisdemethoxycurcumin	GLO1	Lactoylglutathione lyase	3.684e-21	0.67
CL	c1c(c(cc(c1)/C=C/C(=O)COC(=O)/C=C/c1cc(c(cc1)O)OC)OC)O	Calebin A	GLO1	Lactoylglutathione lyase	1.403e-39	0.74
CL	c1(c(ccc(c1)/C=C/C(=O)/C=C(/C=C/c1ccc(c(c1)OC)O)\O)O)OC	Curcumin	GLO1	Lactoylglutathione lyase	4.641e-37	0.67
CL	c1c(c(cc(c1)/C=C/C(=O)CC(=O)/C=C/c1ccc(cc1)O)OC)O	Demethoxycurcumin	GLO1	Lactoylglutathione lyase	2.082e-43	0.89
CL	COC1=C(C=CC(=C1)CCC(=O)CC(=O)C=CC2=CC(=C(C=C2)O)OC)O	dihydrocurcumin	GLO1	Lactoylglutathione lyase	4.082e-34	0.74
CL	COC1=C(C=CC(=C1)C=CC(=O)C=CC2=CC(=C(C=C2)O)OC)O	Go-Y022	GLO1	Lactoylglutathione lyase	1.204e-44	0.76
CL	c1(c(cc(cc1)CCC(=O)/C=C(/C=C/c1cc(c(cc1)O)OC)\O)OC)O	Letestuianin B	GLO1	Lactoylglutathione lyase	1.965e-29	0.62
CL	C1[C@H](C[C@@H]2[C@](C1)([C@@H]1[C@@H]([C@@H](C2)O)[C@H]2[C@]([C@H](C1)O)([C@H](CC2)[C@@H](CCC(=O)NCC(=O)O)C)C)C)O	Glycocholic acid	GPBAR1	G-protein coupled bile acid receptor 1	5.095e-67	0.83
CL	C1[C@H](C[C@@H]2[C@](C1)([C@@H]1[C@@H]([C@@H](C2)O)[C@H]2[C@]([C@H](C1)O)([C@H](CC2)[C@@H](CCC(=O)NCC(=O)O)C)C)C)O	Glycocholic acid	Gpbar1	G-protein coupled bile acid receptor 1	2.737e-06	0.83
CL	CC(CCC(=O)NCCS(=O)(=O)O)C1CCC2C1(CCC3C2C(CC4C3(CCC(C4)O)C)O)C	Tauroursodeoxycholic acid	GPBAR1	G-protein coupled bile acid receptor 1	3.43e-74	1
CL	C(=O)(O)CCCCCCCCCCCCCCCCCCC	Arachidic acid	GPR84	G-protein coupled receptor 84	6.874e-05	1
CL	C(C(=O)/C=C/c1ccc(cc1)O)C(=O)/C=C/c1ccc(cc1)O	bis-(4-hydroxycinnamoyl)methane	GSK3B	Glycogen synthase kinase-3 beta	8.386e-05	1
CL	c1c(ccc(c1)/C=C/C(=O)CC(=O)/C=C/c1ccc(cc1)O)O	Bisdemethoxycurcumin	GSK3B	Glycogen synthase kinase-3 beta	8.386e-05	1
CL	c1c(c(cc(c1)/C=C/C(=O)CC(=O)/C=C/c1ccc(cc1)O)OC)O	Demethoxycurcumin	GSK3B	Glycogen synthase kinase-3 beta	2.589e-06	0.82
CL	CC1=C(C2=C(CCC(O2)(C)CCCC(C)CCCC(C)CCCC(C)C)C(=C1O)C)C	VITAMIN E	GSTO1	Glutathione S-transferase omega-1	7.358e-30	0.69
CL	C(C(=O)/C=C/c1ccc(cc1)O)C(=O)/C=C/c1ccc(cc1)O	bis-(4-hydroxycinnamoyl)methane	HDAC1	Histone deacetylase 1	1.768e-18	0.6
CL	c1c(ccc(c1)/C=C/C(=O)CC(=O)/C=C/c1ccc(cc1)O)O	Bisdemethoxycurcumin	HDAC1	Histone deacetylase 1	1.768e-18	0.6
CL	C(C(=O)/C=C/c1ccc(cc1)O)C(=O)/C=C/c1ccc(cc1)O	bis-(4-hydroxycinnamoyl)methane	HDAC11	Histone deacetylase 11	1.41e-14	0.6
CL	c1c(ccc(c1)/C=C/C(=O)CC(=O)/C=C/c1ccc(cc1)O)O	Bisdemethoxycurcumin	HDAC11	Histone deacetylase 11	1.41e-14	0.6
CL	C(C(=O)/C=C/c1ccc(cc1)O)C(=O)/C=C/c1ccc(cc1)O	bis-(4-hydroxycinnamoyl)methane	HDAC2	Histone deacetylase 2	3.064e-14	0.6
CL	c1c(ccc(c1)/C=C/C(=O)CC(=O)/C=C/c1ccc(cc1)O)O	Bisdemethoxycurcumin	HDAC2	Histone deacetylase 2	3.064e-14	0.6
CL	C(C(=O)/C=C/c1ccc(cc1)O)C(=O)/C=C/c1ccc(cc1)O	bis-(4-hydroxycinnamoyl)methane	HDAC3	Histone deacetylase 3	6.759e-06	0.6
CL	c1c(ccc(c1)/C=C/C(=O)CC(=O)/C=C/c1ccc(cc1)O)O	Bisdemethoxycurcumin	HDAC3	Histone deacetylase 3	6.759e-06	0.6
CL	C(C(=O)/C=C/c1ccc(cc1)O)C(=O)/C=C/c1ccc(cc1)O	bis-(4-hydroxycinnamoyl)methane	HDAC6	Histone deacetylase 6	4.951e-12	0.6
CL	c1c(ccc(c1)/C=C/C(=O)CC(=O)/C=C/c1ccc(cc1)O)O	Bisdemethoxycurcumin	HDAC6	Histone deacetylase 6	4.951e-12	0.6
CL	C(C(=O)/C=C/c1ccc(cc1)O)C(=O)/C=C/c1ccc(cc1)O	bis-(4-hydroxycinnamoyl)methane	HDAC8	Histone deacetylase 8	1.555e-22	0.6
CL	c1c(ccc(c1)/C=C/C(=O)CC(=O)/C=C/c1ccc(cc1)O)O	Bisdemethoxycurcumin	HDAC8	Histone deacetylase 8	1.555e-22	0.6
CL	C(C(=O)/C=C/c1ccc(cc1)O)C(=O)/C=C/c1ccc(cc1)O	bis-(4-hydroxycinnamoyl)methane	HDAC9	Histone deacetylase 9	1.421e-14	0.6
CL	c1c(ccc(c1)/C=C/C(=O)CC(=O)/C=C/c1ccc(cc1)O)O	Bisdemethoxycurcumin	HDAC9	Histone deacetylase 9	1.421e-14	0.6
CL	C(=O)(O)CCCCCCCCCCCCCCCCCCC	Arachidic acid	HMGCR	3-hydroxy-3-methylglutaryl-coenzyme A reductase	4.555e-18	0.74
CL	COC1=C(C=CC(=C1)C=CC=CC(=O)C=CC2=CC(=C(C=C2)O)OC)O	1,7-bis(4-hydroxy-3-methoxyphenyl)-1,4,6-heptatrien-3-one	Hsd11b1	Corticosteroid 11-beta-dehydrogenase isozyme 1	5.584e-19	0.85
CL	C1=CC(=CC=C1C=CC=CC(=O)C=CC2=CC=C(C=C2)O)O	1,7-Bis(4-hydroxyphenyl)-1,4,6-heptatrien-3-one	Hsd11b1	Corticosteroid 11-beta-dehydrogenase isozyme 1	4.235e-22	0.8
CL	C(C(=O)/C=C/c1ccc(cc1)O)C(=O)/C=C/c1ccc(cc1)O	bis-(4-hydroxycinnamoyl)methane	Hsd11b1	Corticosteroid 11-beta-dehydrogenase isozyme 1	4.731e-19	0.68
CL	c1c(ccc(c1)/C=C/C(=O)CC(=O)/C=C/c1ccc(cc1)O)O	Bisdemethoxycurcumin	Hsd11b1	Corticosteroid 11-beta-dehydrogenase isozyme 1	4.731e-19	0.68
CL	c1c(c(cc(c1)/C=C/C(=O)COC(=O)/C=C/c1cc(c(cc1)O)OC)OC)O	Calebin A	Hsd11b1	Corticosteroid 11-beta-dehydrogenase isozyme 1	3.675e-14	0.74
CL	c1(c(ccc(c1)/C=C/C(=O)/C=C(/C=C/c1ccc(c(c1)OC)O)\O)O)OC	Curcumin	Hsd11b1	Corticosteroid 11-beta-dehydrogenase isozyme 1	6.233e-18	0.8
CL	c1c(c(cc(c1)/C=C/C(=O)CC(=O)/C=C/c1ccc(cc1)O)OC)O	Demethoxycurcumin	Hsd11b1	Corticosteroid 11-beta-dehydrogenase isozyme 1	9.608e-19	0.89
CL	COC1=C(C=CC(=C1)CCC(=O)CC(=O)C=CC2=CC(=C(C=C2)O)OC)O	dihydrocurcumin	Hsd11b1	Corticosteroid 11-beta-dehydrogenase isozyme 1	1.566e-09	0.74
CL	COC1=C(C=CC(=C1)C=CC(=O)C=CC2=CC(=C(C=C2)O)OC)O	Go-Y022	Hsd11b1	Corticosteroid 11-beta-dehydrogenase isozyme 1	6.945e-24	1
CL	COC1=C(C=CC(=C1)C=CC(=O)C=CC2=CC(=C(C=C2)O)OC)O	Go-Y022	HSD11B1	Corticosteroid 11-beta-dehydrogenase isozyme 1	0.08155	1
CL	c1(c(cc(cc1)CCC(=O)/C=C(/C=C/c1cc(c(cc1)O)OC)\O)OC)O	Letestuianin B	Hsd11b1	Corticosteroid 11-beta-dehydrogenase isozyme 1	9.649e-09	0.62
CL	COC1=C(C=CC(=C1)C=CC=CC(=O)C=CC2=CC(=C(C=C2)O)OC)O	1,7-bis(4-hydroxy-3-methoxyphenyl)-1,4,6-heptatrien-3-one	Hsd17b3	Testosterone 17-beta-dehydrogenase 3	5.179e-49	0.67
CL	c1c(c(cc(c1)/C=C/C(=O)COC(=O)/C=C/c1cc(c(cc1)O)OC)OC)O	Calebin A	Hsd17b3	Testosterone 17-beta-dehydrogenase 3	5.539e-25	0.74
CL	c1(c(ccc(c1)/C=C/C(=O)/C=C(/C=C/c1ccc(c(c1)OC)O)\O)O)OC	Curcumin	Hsd17b3	Testosterone 17-beta-dehydrogenase 3	4.281e-40	0.67
CL	c1c(c(cc(c1)/C=C/C(=O)CC(=O)/C=C/c1ccc(cc1)O)OC)O	Demethoxycurcumin	Hsd17b3	Testosterone 17-beta-dehydrogenase 3	3.35e-36	0.89
CL	COC1=C(C=CC(=C1)CCC(=O)CC(=O)C=CC2=CC(=C(C=C2)O)OC)O	dihydrocurcumin	Hsd17b3	Testosterone 17-beta-dehydrogenase 3	8.595e-18	0.74
CL	COC1=C(C=CC(=C1)C=CC(=O)C=CC2=CC(=C(C=C2)O)OC)O	Go-Y022	Hsd17b3	Testosterone 17-beta-dehydrogenase 3	5.626e-62	0.76
CL	c1(c(cc(cc1)CCC(=O)/C=C(/C=C/c1cc(c(cc1)O)OC)\O)OC)O	Letestuianin B	Hsd17b3	Testosterone 17-beta-dehydrogenase 3	4.108e-15	0.62
CL	COC1=C(C=CC(=C1)C=CC(=O)C=CC2=CC(=C(C=C2)O)OC)O	Go-Y022	Hsf1	Heat shock factor protein 1	1.122e-08	0.61
CL	COC1=C(C=CC(=C1)C=CC=CC(=O)C=CC2=CC(=C(C=C2)O)OC)O	1,7-bis(4-hydroxy-3-methoxyphenyl)-1,4,6-heptatrien-3-one	Iap	Intestinal-type alkaline phosphatase	3.938e-08	0.6
CL	c1c(c(cc(c1)/C=C/C(=O)COC(=O)/C=C/c1cc(c(cc1)O)OC)OC)O	Calebin A	Iap	Intestinal-type alkaline phosphatase	2.461e-08	0.67
CL	c1(c(ccc(c1)/C=C/C(=O)/C=C(/C=C/c1ccc(c(c1)OC)O)\O)O)OC	Curcumin	Iap	Intestinal-type alkaline phosphatase	2.438e-08	0.6
CL	c1c(c(cc(c1)/C=C/C(=O)CC(=O)/C=C/c1ccc(cc1)O)OC)O	Demethoxycurcumin	Iap	Intestinal-type alkaline phosphatase	3.647e-10	1
CL	COC1=C(C=CC(=C1)CCC(=O)CC(=O)C=CC2=CC(=C(C=C2)O)OC)O	dihydrocurcumin	Iap	Intestinal-type alkaline phosphatase	9.963e-07	0.67
CL	COC1=C(C=CC(=C1)C=CC(=O)C=CC2=CC(=C(C=C2)O)OC)O	Go-Y022	Iap	Intestinal-type alkaline phosphatase	2.411e-10	0.68
CL	c1(c(cc(cc1)CCC(=O)/C=C(/C=C/c1ccc(cc1)O)\O)OC)O	Letestuianin A	Iap	Intestinal-type alkaline phosphatase	3.015e-06	0.61
CL	COC1=C(C=CC(=C1)C=CC(=O)C=CC2=CC(=C(C=C2)O)OC)O	Go-Y022	IKBKG	NF-kappa-B essential modulator	5.147e-31	0.65
CL	COC1=C(C=CC(=C1)C=CC=CC(=O)C=CC2=CC(=C(C=C2)O)OC)O	1,7-bis(4-hydroxy-3-methoxyphenyl)-1,4,6-heptatrien-3-one	JUN	Transcription factor AP-1	1.051e-19	0.63
CL	C(C(=O)/C=C/c1ccc(cc1)O)C(=O)/C=C/c1ccc(cc1)O	bis-(4-hydroxycinnamoyl)methane	JUN	Transcription factor AP-1	1.31e-14	0.67
CL	c1c(ccc(c1)/C=C/C(=O)CC(=O)/C=C/c1ccc(cc1)O)O	Bisdemethoxycurcumin	JUN	Transcription factor AP-1	1.31e-14	0.67
CL	c1c(c(cc(c1)/C=C/C(=O)COC(=O)/C=C/c1cc(c(cc1)O)OC)OC)O	Calebin A	JUN	Transcription factor AP-1	1.11e-16	0.63
CL	c1(c(ccc(c1)/C=C/C(=O)/C=C(/C=C/c1ccc(c(c1)OC)O)\O)O)OC	Curcumin	JUN	Transcription factor AP-1	2.908e-19	0.63
CL	c1c(c(cc(c1)/C=C/C(=O)CC(=O)/C=C/c1ccc(cc1)O)OC)O	Demethoxycurcumin	JUN	Transcription factor AP-1	3.08e-18	0.66
CL	COC1=C(C=CC(=C1)C=CC(=O)C=CC2=CC(=C(C=C2)O)OC)O	Go-Y022	JUN	Transcription factor AP-1	3.683e-22	0.72
CL	COC1=C(C=CC(=C1)C=CC=CC(=O)C=CC2=CC(=C(C=C2)O)OC)O	1,7-bis(4-hydroxy-3-methoxyphenyl)-1,4,6-heptatrien-3-one	KCNK2	Potassium channel subfamily K member 2	2.603e-26	0.67
CL	c1c(c(cc(c1)/C=C/C(=O)COC(=O)/C=C/c1cc(c(cc1)O)OC)OC)O	Calebin A	KCNK2	Potassium channel subfamily K member 2	2.973e-29	0.74
CL	c1(c(ccc(c1)/C=C/C(=O)/C=C(/C=C/c1ccc(c(c1)OC)O)\O)O)OC	Curcumin	KCNK2	Potassium channel subfamily K member 2	2.603e-26	0.67
CL	c1c(c(cc(c1)/C=C/C(=O)CC(=O)/C=C/c1ccc(cc1)O)OC)O	Demethoxycurcumin	KCNK2	Potassium channel subfamily K member 2	1.089e-34	0.89
CL	COC1=C(C=CC(=C1)CCC(=O)CC(=O)C=CC2=CC(=C(C=C2)O)OC)O	dihydrocurcumin	KCNK2	Potassium channel subfamily K member 2	4.823e-29	0.74
CL	COC1=C(C=CC(=C1)C=CC(=O)C=CC2=CC(=C(C=C2)O)OC)O	Go-Y022	KCNK2	Potassium channel subfamily K member 2	4.628e-30	0.76
CL	c1(c(cc(cc1)CCC(=O)/C=C(/C=C/c1cc(c(cc1)O)OC)\O)OC)O	Letestuianin B	KCNK2	Potassium channel subfamily K member 2	1.304e-24	0.62
CL	C(=O)(O)CCCCCCCCCCCCCCCCCCC	Arachidic acid	KDM2A	Lysine-specific demethylase 2A	1.562e-42	0.62
CL	COC1=C(C=CC(=C1)C=CC=CC(=O)C=CC2=CC(=C(C=C2)O)OC)O	1,7-bis(4-hydroxy-3-methoxyphenyl)-1,4,6-heptatrien-3-one	MAOA	Amine oxidase [flavin-containing] A	3.155e-09	0.71
CL	C(C(=O)/C=C/c1ccc(cc1)O)C(=O)/C=C/c1ccc(cc1)O	bis-(4-hydroxycinnamoyl)methane	MAOA	Amine oxidase [flavin-containing] A	8.309e-09	0.69
CL	c1c(ccc(c1)/C=C/C(=O)CC(=O)/C=C/c1ccc(cc1)O)O	Bisdemethoxycurcumin	MAOA	Amine oxidase [flavin-containing] A	8.309e-09	0.69
CL	c1c(c(cc(c1)/C=C/C(=O)COC(=O)/C=C/c1cc(c(cc1)O)OC)OC)O	Calebin A	MAOA	Amine oxidase [flavin-containing] A	2.689e-07	0.6
CL	c1c(c(cc(c1)/C=C/C(=O)CC(=O)/C=C/c1ccc(cc1)O)OC)O	Demethoxycurcumin	MAOA	Amine oxidase [flavin-containing] A	7.327e-14	0.7
CL	COC1=C(C=CC(=C1)CCC(=O)CC(=O)C=CC2=CC(=C(C=C2)O)OC)O	dihydrocurcumin	MAOA	Amine oxidase [flavin-containing] A	4.174e-06	0.61
CL	COC1=C(C=CC(=C1)C=CC(=O)C=CC2=CC(=C(C=C2)O)OC)O	Go-Y022	MAOA	Amine oxidase [flavin-containing] A	7.02e-13	0.61
CL	C1CCN(CC1)C(=O)C=CC=CC2=CC3=C(C=C2)OCO3	piperine	Maoa	Amine oxidase [flavin-containing] A	5.341e-12	1
CL	COC1=C(C=CC(=C1)C=CC=CC(=O)C=CC2=CC(=C(C=C2)O)OC)O	1,7-bis(4-hydroxy-3-methoxyphenyl)-1,4,6-heptatrien-3-one	MAOB	Amine oxidase [flavin-containing] B	1.112e-18	0.71
CL	C(C(=O)/C=C/c1ccc(cc1)O)C(=O)/C=C/c1ccc(cc1)O	bis-(4-hydroxycinnamoyl)methane	MAOB	Amine oxidase [flavin-containing] B	5.365e-20	0.69
CL	c1c(ccc(c1)/C=C/C(=O)CC(=O)/C=C/c1ccc(cc1)O)O	Bisdemethoxycurcumin	MAOB	Amine oxidase [flavin-containing] B	5.365e-20	0.69
CL	c1c(c(cc(c1)/C=C/C(=O)COC(=O)/C=C/c1cc(c(cc1)O)OC)OC)O	Calebin A	MAOB	Amine oxidase [flavin-containing] B	5.453e-12	0.76
CL	c1(c(ccc(c1)/C=C/C(=O)/C=C(/C=C/c1ccc(c(c1)OC)O)\O)O)OC	Curcumin	MAOB	Amine oxidase [flavin-containing] B	2.508e-13	0.6
CL	c1c(c(cc(c1)/C=C/C(=O)CC(=O)/C=C/c1ccc(cc1)O)OC)O	Demethoxycurcumin	MAOB	Amine oxidase [flavin-containing] B	9.488e-21	0.7
CL	COC1=C(C=CC(=C1)CCC(=O)CC(=O)C=CC2=CC(=C(C=C2)O)OC)O	dihydrocurcumin	MAOB	Amine oxidase [flavin-containing] B	1.115e-08	0.61
CL	COC1=C(C=CC(=C1)C=CC(=O)C=CC2=CC(=C(C=C2)O)OC)O	Go-Y022	MAOB	Amine oxidase [flavin-containing] B	1.073e-20	0.68
CL	C1CCN(CC1)C(=O)C=CC=CC2=CC3=C(C=C2)OCO3	piperine	Maob	Amine oxidase [flavin-containing] B	1.391e-37	1
CL	C1CCN(CC1)C(=O)C=CC=CC2=CC3=C(C=C2)OCO3	piperine	Maob	Amine oxidase [flavin-containing] B	5.507e-14	1
CL	C1CCN(CC1)C(=O)C=CC=CC2=CC3=C(C=C2)OCO3	piperine	MAOB	Amine oxidase [flavin-containing] B	9.399e-07	1
CL	COC1=C(C=CC(=C1)C=CC=CC(=O)C=CC2=CC(=C(C=C2)O)OC)O	1,7-bis(4-hydroxy-3-methoxyphenyl)-1,4,6-heptatrien-3-one	MAPT	Microtubule-associated protein tau	3.183e-50	0.6
CL	c1c(c(cc(c1)/C=C/C(=O)COC(=O)/C=C/c1cc(c(cc1)O)OC)OC)O	Calebin A	MAPT	Microtubule-associated protein tau	2.803e-56	0.67
CL	c1(c(ccc(c1)/C=C/C(=O)/C=C(/C=C/c1ccc(c(c1)OC)O)\O)O)OC	Curcumin	MAPT	Microtubule-associated protein tau	2.047e-48	0.63
CL	c1c(c(cc(c1)/C=C/C(=O)CC(=O)/C=C/c1ccc(cc1)O)OC)O	Demethoxycurcumin	MAPT	Microtubule-associated protein tau	1.38e-65	0.82
CL	COC1=C(C=CC(=C1)CCC(=O)CC(=O)C=CC2=CC(=C(C=C2)O)OC)O	dihydrocurcumin	MAPT	Microtubule-associated protein tau	6.426e-55	0.67
CL	COC1=C(C=CC(=C1)C=CC(=O)C=CC2=CC(=C(C=C2)O)OC)O	Go-Y022	MAPT	Microtubule-associated protein tau	4.527e-62	0.68
CL	c1c(c(cc(c1)/C=C/C(=O)COC(=O)/C=C/c1cc(c(cc1)O)OC)OC)O	Calebin A	MET	Hepatocyte growth factor receptor	4.746e-08	0.67
CL	c1c(c(cc(c1)/C=C/C(=O)CC(=O)/C=C/c1ccc(cc1)O)OC)O	Demethoxycurcumin	MET	Hepatocyte growth factor receptor	1.509e-07	0.61
CL	COC1=C(C=CC(=C1)CCC(=O)CC(=O)C=CC2=CC(=C(C=C2)O)OC)O	dihydrocurcumin	MET	Hepatocyte growth factor receptor	2.512e-07	0.64
CL	COC1=C(C=CC(=C1)C=CC(=O)C=CC2=CC(=C(C=C2)O)OC)O	Go-Y022	MET	Hepatocyte growth factor receptor	3.138e-07	0.6
CL	c1(c(cc(cc1)CCC(=O)/C=C(/C=C/c1cc(c(cc1)O)OC)\O)OC)O	Letestuianin B	MET	Hepatocyte growth factor receptor	4.332e-07	0.64
CL	C(C(=O)/C=C/c1ccc(cc1)O)C(=O)/C=C/c1ccc(cc1)O	bis-(4-hydroxycinnamoyl)methane	MMP1	Interstitial collagenase	7.87e-23	0.6
CL	c1c(ccc(c1)/C=C/C(=O)CC(=O)/C=C/c1ccc(cc1)O)O	Bisdemethoxycurcumin	MMP1	Interstitial collagenase	7.87e-23	0.6
CL	C(C(=O)/C=C/c1ccc(cc1)O)C(=O)/C=C/c1ccc(cc1)O	bis-(4-hydroxycinnamoyl)methane	MMP2	72 kDa type IV collagenase	1.086e-18	0.6
CL	c1c(ccc(c1)/C=C/C(=O)CC(=O)/C=C/c1ccc(cc1)O)O	Bisdemethoxycurcumin	MMP2	72 kDa type IV collagenase	1.086e-18	0.6
CL	COC1=C(C=CC(=C1)C=CC=CC(=O)C=CC2=CC(=C(C=C2)O)OC)O	1,7-bis(4-hydroxy-3-methoxyphenyl)-1,4,6-heptatrien-3-one	MMP9	Matrix metalloproteinase-9	4.889e-12	0.67
CL	C(C(=O)/C=C/c1ccc(cc1)O)C(=O)/C=C/c1ccc(cc1)O	bis-(4-hydroxycinnamoyl)methane	MMP9	Matrix metalloproteinase-9	1.926e-23	0.6
CL	c1c(ccc(c1)/C=C/C(=O)CC(=O)/C=C/c1ccc(cc1)O)O	Bisdemethoxycurcumin	MMP9	Matrix metalloproteinase-9	1.926e-23	0.6
CL	c1c(c(cc(c1)/C=C/C(=O)COC(=O)/C=C/c1cc(c(cc1)O)OC)OC)O	Calebin A	MMP9	Matrix metalloproteinase-9	1.375e-11	0.74
CL	c1(c(ccc(c1)/C=C/C(=O)/C=C(/C=C/c1ccc(c(c1)OC)O)\O)O)OC	Curcumin	MMP9	Matrix metalloproteinase-9	3.216e-13	0.67
CL	c1c(c(cc(c1)/C=C/C(=O)CC(=O)/C=C/c1ccc(cc1)O)OC)O	Demethoxycurcumin	MMP9	Matrix metalloproteinase-9	5.235e-22	0.89
CL	COC1=C(C=CC(=C1)CCC(=O)CC(=O)C=CC2=CC(=C(C=C2)O)OC)O	dihydrocurcumin	MMP9	Matrix metalloproteinase-9	5.951e-11	0.74
CL	COC1=C(C=CC(=C1)C=CC(=O)C=CC2=CC(=C(C=C2)O)OC)O	Go-Y022	MMP9	Matrix metalloproteinase-9	4.34e-17	0.76
CL	c1(c(cc(cc1)CCC(=O)/C=C(/C=C/c1cc(c(cc1)O)OC)\O)OC)O	Letestuianin B	MMP9	Matrix metalloproteinase-9	2.142e-11	0.62
CL	COC1=C(C=CC(=C1)CCC(=O)CC(=O)CCC2=CC(=C(C=C2)O)OC)O	1,7-Bis(4-hydroxy-3-methoxyphenyl)-3,5-heptanedione	MTNR1A	Melatonin receptor type 1A	1.179e-11	0.61
CL	COC1=C(C=CC(=C1)CCC(=O)CC(=O)CCC2=CC(=C(C=C2)O)OC)O	1,7-Bis(4-hydroxy-3-methoxyphenyl)-3,5-heptanedione	MTNR1B	Melatonin receptor type 1B	4.274e-14	0.61
CL	COC1=C(C=CC(=C1)C=CC=CC(=O)C=CC2=CC(=C(C=C2)O)OC)O	1,7-bis(4-hydroxy-3-methoxyphenyl)-1,4,6-heptatrien-3-one	NFE2L2	Nuclear factor erythroid 2-related factor 2	3.923e-50	0.85
CL	c1c(c(cc(c1)/C=C/C(=O)COC(=O)/C=C/c1cc(c(cc1)O)OC)OC)O	Calebin A	NFE2L2	Nuclear factor erythroid 2-related factor 2	7.698e-44	0.74
CL	c1(c(ccc(c1)/C=C/C(=O)/C=C(/C=C/c1ccc(c(c1)OC)O)\O)O)OC	Curcumin	NFE2L2	Nuclear factor erythroid 2-related factor 2	1.186e-45	0.8
CL	c1c(c(cc(c1)/C=C/C(=O)CC(=O)/C=C/c1ccc(cc1)O)OC)O	Demethoxycurcumin	NFE2L2	Nuclear factor erythroid 2-related factor 2	2.299e-57	0.89
CL	COC1=C(C=CC(=C1)CCC(=O)CC(=O)C=CC2=CC(=C(C=C2)O)OC)O	dihydrocurcumin	NFE2L2	Nuclear factor erythroid 2-related factor 2	5.359e-34	0.74
CL	COC1=C(C=CC(=C1)C=CC(=O)C=CC2=CC(=C(C=C2)O)OC)O	Go-Y022	NFE2L2	Nuclear factor erythroid 2-related factor 2	5.834e-77	1
CL	c1(c(cc(cc1)CCC(=O)/C=C(/C=C/c1cc(c(cc1)O)OC)\O)OC)O	Letestuianin B	NFE2L2	Nuclear factor erythroid 2-related factor 2	8.243e-32	0.62
CL	COC1=C(C=CC(=C1)C=CC=CC(=O)C=CC2=CC(=C(C=C2)O)OC)O	1,7-bis(4-hydroxy-3-methoxyphenyl)-1,4,6-heptatrien-3-one	NFKB1	Nuclear factor NF-kappa-B p105 subunit	3.033e-51	0.67
CL	c1c(c(cc(c1)/C=C/C(=O)COC(=O)/C=C/c1cc(c(cc1)O)OC)OC)O	Calebin A	NFKB1	Nuclear factor NF-kappa-B p105 subunit	7.61e-39	0.74
CL	c1(c(ccc(c1)/C=C/C(=O)/C=C(/C=C/c1ccc(c(c1)OC)O)\O)O)OC	Curcumin	NFKB1	Nuclear factor NF-kappa-B p105 subunit	9.123e-50	0.67
CL	c1c(c(cc(c1)/C=C/C(=O)CC(=O)/C=C/c1ccc(cc1)O)OC)O	Demethoxycurcumin	NFKB1	Nuclear factor NF-kappa-B p105 subunit	2.2e-42	0.89
CL	COC1=C(C=CC(=C1)CCC(=O)CC(=O)C=CC2=CC(=C(C=C2)O)OC)O	dihydrocurcumin	NFKB1	Nuclear factor NF-kappa-B p105 subunit	1.113e-36	0.74
CL	COC1=C(C=CC(=C1)C=CC(=O)C=CC2=CC(=C(C=C2)O)OC)O	Go-Y022	NFKB1	Nuclear factor NF-kappa-B p105 subunit	5.575e-58	0.76
CL	c1(c(cc(cc1)CCC(=O)/C=C(/C=C/c1cc(c(cc1)O)OC)\O)OC)O	Letestuianin B	NFKB1	Nuclear factor NF-kappa-B p105 subunit	1.328e-34	0.62
CL	COC1=C(C=CC(=C1)C=CC=CC(=O)C=CC2=CC(=C(C=C2)O)OC)O	1,7-bis(4-hydroxy-3-methoxyphenyl)-1,4,6-heptatrien-3-one	Nos2	Nitric oxide synthase, inducible	3.331e-16	0.67
CL	c1c(c(cc(c1)/C=C/C(=O)COC(=O)/C=C/c1cc(c(cc1)O)OC)OC)O	Calebin A	Nos2	Nitric oxide synthase, inducible	1.141e-12	0.74
CL	c1(c(ccc(c1)/C=C/C(=O)/C=C(/C=C/c1ccc(c(c1)OC)O)\O)O)OC	Curcumin	Nos2	Nitric oxide synthase, inducible	7.898e-13	0.67
CL	c1c(c(cc(c1)/C=C/C(=O)CC(=O)/C=C/c1ccc(cc1)O)OC)O	Demethoxycurcumin	Nos2	Nitric oxide synthase, inducible	1.576e-12	0.89
CL	COC1=C(C=CC(=C1)CCC(=O)CC(=O)C=CC2=CC(=C(C=C2)O)OC)O	dihydrocurcumin	Nos2	Nitric oxide synthase, inducible	2.211e-09	0.74
CL	COC1=C(C=CC(=C1)C=CC(=O)C=CC2=CC(=C(C=C2)O)OC)O	Go-Y022	Nos2	Nitric oxide synthase, inducible	1.252e-17	0.76
CL	c1(c(cc(cc1)CCC(=O)/C=C(/C=C/c1cc(c(cc1)O)OC)\O)OC)O	Letestuianin B	Nos2	Nitric oxide synthase, inducible	8.304e-10	0.62
CL	CC(C)CCCC(C)C1CCC2C1(CCC3C2CC=C4C3(CCC(C4)OS(=O)(=O)O)C)C	Cholesterol sulfate	NPC1L1	NPC1-like intracellular cholesterol transporter 1	4.902e-85	0.61
CL	CC(C)CCCC(C)C1CCC2C1(CCC3C2CC=C4C3(CCC(C4)OS(=O)(=O)O)C)C	Cholesterol sulfate	NR1H3	Oxysterols receptor LXR-alpha	4.399e-17	0.6
CL	C1[C@H](C[C@@H]2[C@](C1)([C@@H]1[C@@H]([C@@H](C2)O)[C@H]2[C@]([C@H](C1)O)([C@H](CC2)[C@@H](CCC(=O)NCC(=O)O)C)C)C)O	Glycocholic acid	NR1H4	Bile acid receptor	2.742e-27	0.8
CL	CC(CCC(=O)NCCS(=O)(=O)O)C1CCC2C1(CCC3C2C(CC4C3(CCC(C4)O)C)O)C	Tauroursodeoxycholic acid	NR1H4	Bile acid receptor	2.905e-32	1
CL	C1[C@H](C[C@@H]2[C@](C1)([C@@H]1[C@@H]([C@@H](C2)O)[C@H]2[C@]([C@H](C1)O)([C@H](CC2)[C@@H](CCC(=O)NCC(=O)O)C)C)C)O	Glycocholic acid	NR3C1	Glucocorticoid receptor	2.105e-10	0.61
CL	CC(CCC(=O)NCCS(=O)(=O)O)C1CCC2C1(CCC3C2C(CC4C3(CCC(C4)O)C)O)C	Tauroursodeoxycholic acid	NR3C1	Glucocorticoid receptor	9.77e-09	0.71
CL	C(=O)(O)CCCCCCCCCCCCCCCCCCC	Arachidic acid	OXER1	Oxoeicosanoid receptor 1	2.312e-74	0.65
CL	CC(CCC(=O)NCCS(=O)(=O)O)C1CCC2C1(CCC3C2C(CC4C3(CCC(C4)O)C)O)C	Tauroursodeoxycholic acid	PLA2G1B	Phospholipase A2	0.001746	1
CL	COC1=C(C=CC(=C1)C=CC=CC(=O)C=CC2=CC(=C(C=C2)O)OC)O	1,7-bis(4-hydroxy-3-methoxyphenyl)-1,4,6-heptatrien-3-one	pol	Integrase	9.022e-36	0.62
CL	C(C(=O)/C=C/c1ccc(cc1)O)C(=O)/C=C/c1ccc(cc1)O	bis-(4-hydroxycinnamoyl)methane	pol	Integrase	1.305e-21	0.62
CL	c1c(ccc(c1)/C=C/C(=O)CC(=O)/C=C/c1ccc(cc1)O)O	Bisdemethoxycurcumin	pol	Integrase	1.305e-21	0.62
CL	c1c(c(cc(c1)/C=C/C(=O)COC(=O)/C=C/c1cc(c(cc1)O)OC)OC)O	Calebin A	pol	Integrase	3.464e-40	0.69
CL	c1(c(ccc(c1)/C=C/C(=O)/C=C(/C=C/c1ccc(c(c1)OC)O)\O)O)OC	Curcumin	pol	Integrase	3.187e-39	0.62
CL	c1c(c(cc(c1)/C=C/C(=O)CC(=O)/C=C/c1ccc(cc1)O)OC)O	Demethoxycurcumin	pol	Integrase	6.205e-38	0.82
CL	COC1=C(C=CC(=C1)CCC(=O)CC(=O)C=CC2=CC(=C(C=C2)O)OC)O	dihydrocurcumin	pol	Integrase	1.052e-31	0.69
CL	COC1=C(C=CC(=C1)C=CC(=O)C=CC2=CC(=C(C=C2)O)OC)O	Go-Y022	pol	Integrase	6.26e-42	0.7
CL	CC(C)CCCC(C)C1CCC2C1(CCC3C2CC=C4C3(CCC(C4)OS(=O)(=O)O)C)C	Cholesterol sulfate	POLA1	DNA polymerase alpha catalytic subunit	5.276e-21	0.75
CL	C(=O)(O)CCCCCCCCCCCCCCCCCCC	Arachidic acid	PPARA	Peroxisome proliferator-activated receptor alpha	1.257e-08	1
CL	C(=O)(O)CCCCCCCCCCCCCCCCCCC	Arachidic acid	PPARD	Peroxisome proliferator-activated receptor delta	3.946e-06	0.74
CL	C(=O)(O)CCCCCCCCCCCCCCCCCCC	Arachidic acid	PPARG	Peroxisome proliferator-activated receptor gamma	1.389e-09	0.74
CL	C(C(=O)/C=C/c1ccc(cc1)O)C(=O)/C=C/c1ccc(cc1)O	bis-(4-hydroxycinnamoyl)methane	PPO2	Polyphenol oxidase 2	1.543e-14	0.61
CL	c1c(ccc(c1)/C=C/C(=O)CC(=O)/C=C/c1ccc(cc1)O)O	Bisdemethoxycurcumin	PPO2	Polyphenol oxidase 2	1.543e-14	0.61
CL	COC1=C(C=CC(=C1)C=CC=CC(=O)C=CC2=CC(=C(C=C2)O)OC)O	1,7-bis(4-hydroxy-3-methoxyphenyl)-1,4,6-heptatrien-3-one	PTGES	Prostaglandin E synthase	1.683e-07	0.67
CL	c1c(c(cc(c1)/C=C/C(=O)COC(=O)/C=C/c1cc(c(cc1)O)OC)OC)O	Calebin A	PTGES	Prostaglandin E synthase	2.253e-09	0.74
CL	c1(c(ccc(c1)/C=C/C(=O)/C=C(/C=C/c1ccc(c(c1)OC)O)\O)O)OC	Curcumin	PTGES	Prostaglandin E synthase	1.953e-07	0.67
CL	c1c(c(cc(c1)/C=C/C(=O)CC(=O)/C=C/c1ccc(cc1)O)OC)O	Demethoxycurcumin	PTGES	Prostaglandin E synthase	1.778e-09	0.89
CL	COC1=C(C=CC(=C1)CCC(=O)CC(=O)C=CC2=CC(=C(C=C2)O)OC)O	dihydrocurcumin	PTGES	Prostaglandin E synthase	5.728e-08	0.74
CL	COC1=C(C=CC(=C1)C=CC(=O)C=CC2=CC(=C(C=C2)O)OC)O	Go-Y022	PTGES	Prostaglandin E synthase	6.282e-09	0.76
CL	c1(c(cc(cc1)CCC(=O)/C=C(/C=C/c1cc(c(cc1)O)OC)\O)OC)O	Letestuianin B	PTGES	Prostaglandin E synthase	1.48e-06	0.62
CL	COC1=C(C=CC(=C1)C=CC=CC(=O)C=CC2=CC(=C(C=C2)O)OC)O	1,7-bis(4-hydroxy-3-methoxyphenyl)-1,4,6-heptatrien-3-one	PTGS1	Prostaglandin G/H synthase 1	8.309e-06	0.67
CL	c1c(c(cc(c1)/C=C/C(=O)COC(=O)/C=C/c1cc(c(cc1)O)OC)OC)O	Calebin A	PTGS1	Prostaglandin G/H synthase 1	6.44e-08	0.74
CL	c1(c(ccc(c1)/C=C/C(=O)/C=C(/C=C/c1ccc(c(c1)OC)O)\O)O)OC	Curcumin	PTGS1	Prostaglandin G/H synthase 1	8.309e-06	0.67
CL	c1c(c(cc(c1)/C=C/C(=O)CC(=O)/C=C/c1ccc(cc1)O)OC)O	Demethoxycurcumin	PTGS1	Prostaglandin G/H synthase 1	1.246e-11	0.89
CL	COC1=C(C=CC(=C1)CCC(=O)CC(=O)C=CC2=CC(=C(C=C2)O)OC)O	dihydrocurcumin	PTGS1	Prostaglandin G/H synthase 1	5.077e-06	0.74
CL	COC1=C(C=CC(=C1)C=CC(=O)C=CC2=CC(=C(C=C2)O)OC)O	Go-Y022	PTGS1	Prostaglandin G/H synthase 1	1.938e-09	0.76
CL	[C@@H]([C@@H](N)CO)(O)CCCCCCCCCCCCCCC	Sphinganine	ska	Streptokinase A	0.6378	1
CL	C1[C@H](C[C@@H]2[C@](C1)([C@@H]1[C@@H]([C@@H](C2)O)[C@H]2[C@]([C@H](C1)O)([C@H](CC2)[C@@H](CCC(=O)NCC(=O)O)C)C)C)O	Glycocholic acid	SLC10A1	Sodium/bile acid cotransporter	2.891e-119	0.76
CL	C1[C@H](C[C@@H]2[C@](C1)([C@@H]1[C@@H]([C@@H](C2)O)[C@H]2[C@]([C@H](C1)O)([C@H](CC2)[C@@H](CCC(=O)NCC(=O)O)C)C)C)O	Glycocholic acid	Slc10a1	Sodium/bile acid cotransporter	3.579e-73	0.76
CL	CC(CCC(=O)NCCS(=O)(=O)O)C1CCC2C1(CCC3C2C(CC4C3(CCC(C4)O)C)O)C	Tauroursodeoxycholic acid	SLC10A1	Sodium/bile acid cotransporter	1.005e-109	0.81
CL	CC(CCC(=O)NCCS(=O)(=O)O)C1CCC2C1(CCC3C2C(CC4C3(CCC(C4)O)C)O)C	Tauroursodeoxycholic acid	Slc10a1	Sodium/bile acid cotransporter	6.657e-72	0.81
CL	C1[C@H](C[C@@H]2[C@](C1)([C@@H]1[C@@H]([C@@H](C2)O)[C@H]2[C@]([C@H](C1)O)([C@H](CC2)[C@@H](CCC(=O)NCC(=O)O)C)C)C)O	Glycocholic acid	SLC10A2	Ileal sodium/bile acid cotransporter	7.838e-47	0.65
CL	CC(CCC(=O)NCCS(=O)(=O)O)C1CCC2C1(CCC3C2C(CC4C3(CCC(C4)O)C)O)C	Tauroursodeoxycholic acid	SLC10A2	Ileal sodium/bile acid cotransporter	2.812e-51	1
CL	CC(=O)CCCCCCCCC	2-Undecanone	SLC22A6	Solute carrier family 22 member 6	1.477e-09	0.62
CL	C(=O)(O)CCCCCCCCCCCCCCCCCCC	Arachidic acid	SLC22A6	Solute carrier family 22 member 6	5.839e-23	1
CL	NC(=O)CCCCCCCCCCCCCCCCC	Octadecanamide	SLC22A6	Solute carrier family 22 member 6	1.477e-09	0.62
CL	CC(=O)CCCCCCCCC	2-Undecanone	SLC22A8	Solute carrier family 22 member 8	7.076e-12	0.62
CL	C(=O)(O)CCCCCCCCCCCCCCCCCCC	Arachidic acid	SLC22A8	Solute carrier family 22 member 8	9.774e-19	1
CL	NC(=O)CCCCCCCCCCCCCCCCC	Octadecanamide	SLC22A8	Solute carrier family 22 member 8	7.076e-12	0.62
CL	[C@@H]([C@@H](N)CO)(O)CCCCCCCCCCCCCCC	Sphinganine	SPHK1	Sphingosine kinase 1	4.058e-18	1
CL	COC1=C(C=CC(=C1)C=CC=CC(=O)C=CC2=CC(=C(C=C2)O)OC)O	1,7-bis(4-hydroxy-3-methoxyphenyl)-1,4,6-heptatrien-3-one	sssIM	CPG DNA methylase	5.775e-47	0.67
CL	C(C(=O)/C=C/c1ccc(cc1)O)C(=O)/C=C/c1ccc(cc1)O	bis-(4-hydroxycinnamoyl)methane	sssIM	CPG DNA methylase	1.143e-63	1
CL	c1c(ccc(c1)/C=C/C(=O)CC(=O)/C=C/c1ccc(cc1)O)O	Bisdemethoxycurcumin	sssIM	CPG DNA methylase	1.143e-63	1
CL	c1c(c(cc(c1)/C=C/C(=O)COC(=O)/C=C/c1cc(c(cc1)O)OC)OC)O	Calebin A	sssIM	CPG DNA methylase	2.568e-53	0.74
CL	c1(c(ccc(c1)/C=C/C(=O)/C=C(/C=C/c1ccc(c(c1)OC)O)\O)O)OC	Curcumin	sssIM	CPG DNA methylase	5.775e-47	0.67
CL	c1c(c(cc(c1)/C=C/C(=O)CC(=O)/C=C/c1ccc(cc1)O)OC)O	Demethoxycurcumin	sssIM	CPG DNA methylase	1.44e-74	1
CL	COC1=C(C=CC(=C1)CCC(=O)CC(=O)C=CC2=CC(=C(C=C2)O)OC)O	dihydrocurcumin	sssIM	CPG DNA methylase	1.052e-53	0.74
CL	COC1=C(C=CC(=C1)C=CC(=O)C=CC2=CC(=C(C=C2)O)OC)O	Go-Y022	sssIM	CPG DNA methylase	2.413e-53	0.76
CL	c1(c(cc(cc1)CCC(=O)/C=C(/C=C/c1ccc(cc1)O)\O)OC)O	Letestuianin A	sssIM	CPG DNA methylase	3.468e-46	0.61
CL	c1(c(cc(cc1)CCC(=O)/C=C(/C=C/c1cc(c(cc1)O)OC)\O)OC)O	Letestuianin B	sssIM	CPG DNA methylase	8.498e-45	0.62
CL	COC1=C(C=CC(=C1)C=CC(=O)C=CC2=CC(=C(C=C2)O)OC)O	Go-Y022	STAT3	Signal transducer and activator of transcription 3	0.001523	1
CL	COC1=C(C=CC(=C1)CCC(=O)CC(=O)CCC2=CC(=C(C=C2)O)OC)O	1,7-Bis(4-hydroxy-3-methoxyphenyl)-3,5-heptanedione	TAAR1	Trace amine-associated receptor 1	1.726e-07	0.63
CL	CC(=O)CCCCCCCCC	2-Undecanone	TLR2	Toll-like receptor 2	8.959e-13	0.62
CL	C(=O)(O)CCCCCCCCCCCCCCCCCCC	Arachidic acid	TLR2	Toll-like receptor 2	1.778e-29	1
CL	NC(=O)CCCCCCCCCCCCCCCCC	Octadecanamide	TLR2	Toll-like receptor 2	2.577e-40	0.62
CL	COC1=C(C=CC(=C1)C=CC=CC(=O)C=CC2=CC(=C(C=C2)O)OC)O	1,7-bis(4-hydroxy-3-methoxyphenyl)-1,4,6-heptatrien-3-one	Tlr4	Toll-like receptor 4	3.126e-10	0.67
CL	c1c(c(cc(c1)/C=C/C(=O)COC(=O)/C=C/c1cc(c(cc1)O)OC)OC)O	Calebin A	Tlr4	Toll-like receptor 4	5.172e-11	0.74
CL	c1(c(ccc(c1)/C=C/C(=O)/C=C(/C=C/c1ccc(c(c1)OC)O)\O)O)OC	Curcumin	Tlr4	Toll-like receptor 4	1.611e-10	0.67
CL	c1c(c(cc(c1)/C=C/C(=O)CC(=O)/C=C/c1ccc(cc1)O)OC)O	Demethoxycurcumin	Tlr4	Toll-like receptor 4	1.861e-18	0.89
CL	COC1=C(C=CC(=C1)CCC(=O)CC(=O)C=CC2=CC(=C(C=C2)O)OC)O	dihydrocurcumin	Tlr4	Toll-like receptor 4	4.251e-08	0.74
CL	COC1=C(C=CC(=C1)C=CC(=O)C=CC2=CC(=C(C=C2)O)OC)O	Go-Y022	Tlr4	Toll-like receptor 4	1.124e-23	0.76
CL	c1(c(cc(cc1)CCC(=O)/C=C(/C=C/c1cc(c(cc1)O)OC)\O)OC)O	Letestuianin B	Tlr4	Toll-like receptor 4	6.298e-07	0.62
CL	C(C(=O)/C=C/c1ccc(cc1)O)C(=O)/C=C/c1ccc(cc1)O	bis-(4-hydroxycinnamoyl)methane	TLR9	Toll-like receptor 9	8.327e-10	1
CL	c1c(ccc(c1)/C=C/C(=O)CC(=O)/C=C/c1ccc(cc1)O)O	Bisdemethoxycurcumin	TLR9	Toll-like receptor 9	8.327e-10	1
CL	c1c(c(cc(c1)/C=C/C(=O)CC(=O)/C=C/c1ccc(cc1)O)OC)O	Demethoxycurcumin	TLR9	Toll-like receptor 9	1.204e-08	1
CL	COC1=C(C=CC(=C1)C=CC(=O)C=CC2=CC(=C(C=C2)O)OC)O	Go-Y022	TLR9	Toll-like receptor 9	2.245e-06	0.68
CL	c1(c(cc(cc1)CCC(=O)/C=C(/C=C/c1ccc(cc1)O)\O)OC)O	Letestuianin A	TLR9	Toll-like receptor 9	3.979e-06	0.61
CL	c1c(c(cc(c1)/C=C/C(=O)CC(=O)/C=C/c1ccc(cc1)O)OC)O	Demethoxycurcumin	TOP2A	DNA topoisomerase 2-alpha	2.863e-59	0.66
CL	COC1=C(C=CC(=C1)C=CC=CC(=O)C=CC2=CC(=C(C=C2)O)OC)O	1,7-bis(4-hydroxy-3-methoxyphenyl)-1,4,6-heptatrien-3-one	TRPV1	Transient receptor potential cation channel subfamily V member 1	2.842e-09	0.6
CL	COC1=C(C=CC(=C1)CCC(=O)CC(=O)CCC2=CC(=C(C=C2)O)OC)O	1,7-Bis(4-hydroxy-3-methoxyphenyl)-3,5-heptanedione	TRPV1	Transient receptor potential cation channel subfamily V member 1	5.551e-16	0.61
CL	c1c(c(cc(c1)/C=C/C(=O)CC(=O)/C=C/c1ccc(cc1)O)OC)O	Demethoxycurcumin	TRPV1	Transient receptor potential cation channel subfamily V member 1	3.075e-14	0.61
CL	COC1=C(C=CC(=C1)C=CC(=O)C=CC2=CC(=C(C=C2)O)OC)O	Go-Y022	TRPV1	Transient receptor potential cation channel subfamily V member 1	7.323e-12	0.68
CL	C1CCN(CC1)C(=O)C=CC=CC2=CC3=C(C=C2)OCO3	piperine	TRPV1	Transient receptor potential cation channel subfamily V member 1	6.731e-07	1
CL	NC(=O)CCCCCCCCCCCCCCCCC	Octadecanamide	Trpv2	Transient receptor potential cation channel subfamily V member 2	1.663e-75	0.74
CL	CC1=C(C2=C(CCC(O2)(C)CCCC(C)CCCC(C)CCCC(C)C)C(=C1O)C)C	VITAMIN E	TTPA	Alpha-tocopherol transfer protein	2.309e-91	0.68
CL	c1c(c(cc(c1)/C=C/C(=O)COC(=O)/C=C/c1cc(c(cc1)O)OC)OC)O	Calebin A	TTR	Transthyretin	1.11e-16	0.65
CL	CC(C)CCCC(C)C1CCC2C1(CCC3C2CC=C4C3(CCC(C4)OS(=O)(=O)O)C)C	Cholesterol sulfate	UGCG	Ceramide glucosyltransferase	4.319e-07	0.62

## Sheet: Final NA targets
Final target list of Nisha Amlaki
Target	UniProt ID	Description
ABCB1	P08183	ATP-dependent translocase ABCB1
ABCB11	O95342	Bile salt export pump
ABCC1	P33527	Multidrug resistance-associated protein 1
ABCC4	O15439	Multidrug resistance-associated protein 4
ABCG2	Q9UNQ0	Broad substrate specificity ATP-binding cassette transporter ABCG2
ACHE	P22303	Acetylcholinesterase
ACP1	P24666	Low molecular weight phosphotyrosine protein phosphatase
Adora1	P30542	Adenosine receptor A1
Adora2a	P29274	Adenosine receptor A2a
ADRA2A	P08913	Alpha-2A adrenergic receptor
ADRA2C	P18825	Alpha-2C adrenergic receptor
Akr1a1	P14550	Aldo-keto reductase family 1 member A1
AKR1B1	P15121	Aldo-keto reductase family 1 member B1
AKR1B10	O60218	Aldo-keto reductase family 1 member B10
Akr1c21	P52895	Aldo-keto reductase family 1 member C21
AKT1	P31749	RAC-alpha serine/threonine-protein kinase
ALK	Q9UM73	ALK tyrosine kinase receptor
ALOX12	P18054	Arachidonate 12-lipoxygenase, 12S-type
ALOX15	P16050	Arachidonate 15-lipoxygenase
ALOX5	P09917	Arachidonate 5-lipoxygenase
ALPI	P09923	Intestinal-type alkaline phosphatase
ALPL	P05186	Alkaline phosphatase, tissue-nonspecific isozyme
AMY1A	P0DUB6	Alpha-amylase 1
ANTXR2	P58335	Anthrax toxin receptor 2
APEX1	P27695	DNA-(apurinic or apyrimidinic site) lyase
APP	P05067	Amyloid-beta precursor protein
Arg1	P05089	Arginase-1
ATG4B	Q9Y4P1	Cysteine protease ATG4B
AURKA	O14965	Aurora kinase A
AURKB	Q96GD4	Aurora kinase B
AVPR2	P30518	Vasopressin V2 receptor
AXL	P30530	Tyrosine-protein kinase receptor UFO
BACE1	P56817	Beta-secretase 1
BCHE	P06276	Carboxylic ester hydrolase
BCL2	P10415	Apoptosis regulator Bcl-2
BRAF	P15056	Serine/threonine-protein kinase B-raf
CA1	P00915	Carbonic anhydrase 1
CA12	O43570	Carbonic anhydrase 12
CA13	Q8N1Q1	Carbonic anhydrase 13
CA14	Q9ULX7	Carbonic anhydrase 14
CA2	P00918	Carbonic anhydrase 2
CA3	P07451	Carbonic anhydrase 3
CA4	P22748	Carbonic anhydrase 4
CA5A	P35218	Carbonic anhydrase 5A, mitochondrial
CA5B	Q9Y2D0	Carbonic anhydrase 5B, mitochondrial
CA6	P23280	Carbonic anhydrase 6
CA7	P43166	Carbonic anhydrase 7
CA9	Q16790	Carbonic anhydrase 9
CAMK2B	Q13554	Calcium/calmodulin-dependent protein kinase type II subunit beta
CBS	P35520	Cystathionine beta-synthase
CCNA1	P78396	Cyclin-A1
CCNA2	P20248	Cyclin-A2
CCND1	P24385	G1/S-specific cyclin-D1
CCR4	P51679	C-C chemokine receptor type 4
CD81	P60033	CD81 antigen
CDK1	P06493	Cyclin-dependent kinase 1
CDK2	P24941	Cyclin-dependent kinase 2
CDK4	P11802	Cyclin-dependent kinase 4
CES1	P23141	Liver carboxylesterase 1
CES2	O00748	Cocaine esterase
CISD1	Q9NZ45	CDGSH iron-sulfur domain-containing protein 1
Cnr1	P21554	Cannabinoid receptor 1
CRABP1	P29762	Cellular retinoic acid-binding protein 1
CRYAB	P02511	Alpha-crystallin B chain
CSNK2A1	P68400	Casein kinase II subunit alpha
Csnk2b	P67870	Casein kinase II subunit beta
CXCL12	P48061	Stromal cell-derived factor 1
CXCR1	P25024	C-X-C chemokine receptor type 1
CYP17A1	P05093	Steroid 17-alpha-hydroxylase/17,20 lyase
CYP19A1	P11511	Aromatase
CYP1A1	P04798	Cytochrome P450 1A1
CYP1A2	P05177	Cytochrome P450 1A2
CYP1B1	Q16678	Cytochrome P450 1B1
CYP2C8	P10632	Cytochrome P450 2C8
CYP2C9	P11712	Cytochrome P450 2C9
CYP2D6	P10635	Cytochrome P450 2D6
CYP3A4	P08684	Cytochrome P450 3A4
DAPK1	P53355	Death-associated protein kinase 1
DDAH1	O94760	N(G),N(G)-dimethylarginine dimethylaminohydrolase 1
DHCR24	Q15392	Delta(24)-sterol reductase
Dhcr7	Q9UBM7	7-dehydrocholesterol reductase
DNMT1	P26358	DNA (cytosine-5)-methyltransferase 1
DPP4	P27487	Dipeptidyl peptidase 4
DRD4	P21917	D(4) dopamine receptor
DYRK1A	Q13627	Dual specificity tyrosine-phosphorylation-regulated kinase 1A
EGFR	P00533	Epidermal growth factor receptor
ELAVL1	Q15717	ELAV-like protein 1
ELAVL3	Q14576	ELAV-like protein 3
ENPP2	Q13822	Ectonucleotide pyrophosphatase/phosphodiesterase family member 2
EP300	Q09472	Histone acetyltransferase p300
EPHB4	P54760	Ephrin type-B receptor 4
ERBB2	P04626	Receptor tyrosine-protein kinase erbB-2
ESR1	P03372	Estrogen receptor
ESR2	Q92731	Estrogen receptor beta
F2	P00734	Prothrombin
F3	P13726	Tissue factor
FAAH	O00519	Fatty-acid amide hydrolase 1
FABP3	P05413	Fatty acid-binding protein, heart
FASN	P49327	Fatty acid synthase
FFAR4	Q5NUL3	Free fatty acid receptor 4
Fgr	P09769	Tyrosine-protein kinase Fgr
FLT3	P36888	Receptor-type tyrosine-protein kinase FLT3
FLT4	P35916	Vascular endothelial growth factor receptor 3
FOS	P01100	Proto-oncogene c-Fos
FURIN	P09958	Furin
FUT4	P22083	Alpha-(1,3)-fucosyltransferase 4
FUT7	Q11130	Alpha-(1,3)-fucosyltransferase 7
FYN	P06241	Tyrosine-protein kinase Fyn
GBA2	Q9HCG7	Non-lysosomal glucosylceramidase
GLO1	Q04760	Lactoylglutathione lyase
GPBAR1	Q8TDU6	G-protein coupled bile acid receptor 1
GPR35	Q9HC97	G-protein coupled receptor 35
GPR84	Q9NQS5	G-protein coupled receptor 84
GSK3B	P49841	Glycogen synthase kinase-3 beta
GSTO1	P78417	Glutathione S-transferase omega-1
HDAC1	Q13547	Histone deacetylase 1
HDAC11	Q96DB2	Histone deacetylase 11
HDAC2	Q92769	Histone deacetylase 2
HDAC3	O15379	Histone deacetylase 3
HDAC6	Q9UBN7	Histone deacetylase 6
HDAC8	Q9BY41	Histone deacetylase 8
HDAC9	Q9UKV0	Histone deacetylase 9
HMGCR	P04035	3-hydroxy-3-methylglutaryl-coenzyme A reductase
HSD11B1	P28845	Corticosteroid 11-beta-dehydrogenase isozyme 1
HSD17B2	P37059	Estradiol 17-beta-dehydrogenase 2
Hsd17b3	P37058	Testosterone 17-beta-dehydrogenase 3
Hsf1	Q00613	Heat shock factor protein 1
HSPA1A	P0DMV8	Heat shock 70 kDa protein 1A
IGF1R	P08069	Insulin-like growth factor 1 receptor
IKBKG	Q9Y6K9	NF-kappa-B essential modulator
IL2	P60568	Interleukin-2
IL5	P05113	Interleukin-5
INSR	P06213	Insulin receptor
JUN	P05412	Transcription factor AP-1
KCNH2	Q12809	Potassium voltage-gated channel subfamily H member 2
KCNK2	O95069	Potassium channel subfamily K member 2
KDM2A	Q9Y2K7	Lysine-specific demethylase 2A
KDM4E	B2RXH2	Lysine-specific demethylase 4E
KDR	P35968	Vascular endothelial growth factor receptor 2
KLK2	P20151	Kallikrein-2
LPO	P22079	Lactoperoxidase
Lyn	P07948	Tyrosine-protein kinase Lyn
MAOA	P21397	Amine oxidase [flavin-containing] A
MAOB	P27338	Amine oxidase [flavin-containing] B
MAP3K8	P41279	Mitogen-activated protein kinase kinase kinase 8
MAPK14	Q16539	Mitogen-activated protein kinase 14
MAPKAPK5	Q8IW41	MAP kinase-activated protein kinase 5
MAPT	P10636	Microtubule-associated protein tau
MCL1	Q07820	Induced myeloid leukemia cell differentiation protein Mcl-1
MET	P08581	Hepatocyte growth factor receptor
MIF	P14174	Macrophage migration inhibitory factor
MMP1	P03956	Interstitial collagenase
MMP13	P45452	Collagenase 3
MMP14	P50281	Matrix metalloproteinase-14
MMP2	P08253	72 kDa type IV collagenase
MMP3	P08254	Stromelysin-1
MMP9	P14780	Matrix metalloproteinase-9
MPG	P29372	DNA-3-methyladenine glycosylase
MPO	P05164	Myeloperoxidase
MTNR1A	P48039	Melatonin receptor type 1A
MTNR1B	P49286	Melatonin receptor type 1B
MYLK	Q15746	Myosin light chain kinase, smooth muscle
nanH	Q99519	Sialidase
NEK2	P51955	Serine/threonine-protein kinase Nek2
NEK6	Q9HC98	Serine/threonine-protein kinase Nek6
NFE2L2	Q16236	Nuclear factor erythroid 2-related factor 2
NFKB1	P19838	Nuclear factor NF-kappa-B p105 subunit
NMUR2	Q9GZQ4	Neuromedin-U receptor 2
Nos1	P29475	Nitric oxide synthase, brain
Nos2	P35228	Nitric oxide synthase, inducible
NOS3	P29474	Nitric oxide synthase, endothelial
NOX4	Q9NPH5	NADPH oxidase 4
NPC1L1	Q9UHC9	NPC1-like intracellular cholesterol transporter 1
NQO2	P16083	Ribosyldihydronicotinamide dehydrogenase [quinone]
NR1H2	P55055	Oxysterols receptor LXR-beta
NR1H3	Q13133	Oxysterols receptor LXR-alpha
NR1H4	Q96RI1	Bile acid receptor
NR3C1	P04150	Glucocorticoid receptor
NR4A1	P22736	Nuclear receptor subfamily 4 group A member 1
Nt5e	P21589	5'-nucleotidase
NUAK1	O60285	NUAK family SNF1-like kinase 1
OXER1	Q8TDS5	Oxoeicosanoid receptor 1
P4HB	P07237	Protein disulfide-isomerase
Parg	Q86W56	Poly(ADP-ribose) glycohydrolase
PDGFRB	P09619	Platelet-derived growth factor receptor beta
PGAM1	P18669	Phosphoglycerate mutase 1
PGD	P52209	6-phosphogluconate dehydrogenase, decarboxylating
PIK3R1	P27986	Phosphatidylinositol 3-kinase regulatory subunit alpha
PIM1	P11309	Serine/threonine-protein kinase pim-1
PKN1	Q16512	Serine/threonine-protein kinase N1
PLA2G1B	P04054	Phospholipase A2
PLK1	P53350	Serine/threonine-protein kinase PLK1
PLK4	O00444	Serine/threonine-protein kinase PLK4
POLA1	P09884	DNA polymerase alpha catalytic subunit
Polb	P06746	DNA polymerase beta
POLH	Q9Y253	DNA polymerase eta
POLI	Q9UNA4	DNA polymerase iota
PPARA	Q07869	Peroxisome proliferator-activated receptor alpha
PPARD	Q03181	Peroxisome proliferator-activated receptor delta
PPARG	P37231	Peroxisome proliferator-activated receptor gamma
PTGES	O14684	Prostaglandin E synthase
PTGS1	P23219	Prostaglandin G/H synthase 1
PTK2	Q05397	Focal adhesion kinase 1
PTPN1	P18031	Tyrosine-protein phosphatase non-receptor type 1
PTPN2	P17706	Tyrosine-protein phosphatase non-receptor type 2
PTPN6	P29350	Tyrosine-protein phosphatase non-receptor type 6
PTPRS	Q13332	Receptor-type tyrosine-protein phosphatase S
PYGL	P06737	Glycogen phosphorylase, liver form
Rara	P10276	Retinoic acid receptor alpha
RARB	P10826	Retinoic acid receptor beta
RARG	P13631	Retinoic acid receptor gamma
RBP4	P02753	Retinol-binding protein 4
RELA	Q04206	Transcription factor p65
RORC	P51449	Nuclear receptor ROR-gamma
RPS6KA3	P51812	Ribosomal protein S6 kinase alpha-3
RXRA	P19793	Retinoic acid receptor RXR-alpha
RXRB	P28702	Retinoic acid receptor RXR-beta
RXRG	P48443	Retinoic acid receptor RXR-gamma
SERPINE1	P05121	Plasminogen activator inhibitor 1
Shh	Q15465	Sonic hedgehog protein
SLC10A1	Q14973	Sodium/bile acid cotransporter
SLC10A2	Q12908	Ileal sodium/bile acid cotransporter
Slc16a7	O60669	Monocarboxylate transporter 2
SLC22A6	Q4U2R8	Solute carrier family 22 member 6
SLC22A8	Q8TCC7	Solute carrier family 22 member 8
SLC5A1	P13866	Sodium/glucose cotransporter 1
SLC5A2	P31639	Sodium/glucose cotransporter 2
SLC5A4	Q9NY91	Solute carrier family 5 member 4
Slc6a3	Q01959	Sodium-dependent dopamine transporter
SMAD3	P84022	Mothers against decapentaplegic homolog 3
SPHK1	Q9NYA1	Sphingosine kinase 1
Sqle	Q14534	Squalene monooxygenase
SRC	P12931	Proto-oncogene tyrosine-protein kinase Src
SREBF2	Q12772	Sterol regulatory element-binding protein 2
ST3GAL3	Q11203	CMP-N-acetylneuraminate-beta-1,4-galactoside alpha-2,3-sialyltransferase
ST6GAL1	P15907	Beta-galactoside alpha-2,6-sialyltransferase 1
STAT1	P42224	Signal transducer and activator of transcription 1-alpha/beta
STAT3	P40763	Signal transducer and activator of transcription 3
Syk	P43405	Tyrosine-protein kinase SYK
SYN1	P17600	Synapsin-1
TAAR1	Q96RJ0	Trace amine-associated receptor 1
TAS2R31	P59538	Taste receptor type 2 member 31
TEK	Q02763	Angiopoietin-1 receptor
TERT	O14746	Telomerase reverse transcriptase
TIM23	O14925	Mitochondrial import inner membrane translocase subunit TIM23
TLR2	O60603	Toll-like receptor 2
Tlr4	O00206	Toll-like receptor 4
TLR9	Q9NR96	Toll-like receptor 9
TNNC1	P63316	Troponin C, slow skeletal and cardiac muscles
TNNI3	P19429	Troponin I, cardiac muscle
TNNT2	P45379	Troponin T, cardiac muscle
TOP1	P11387	DNA topoisomerase 1
TOP2A	P11388	DNA topoisomerase 2-alpha
TPT1	P13693	tRNA 2'-phosphotransferase
TRPV1	Q8NER1	Transient receptor potential cation channel subfamily V member 1
Trpv2	Q9Y5S1	Transient receptor potential cation channel subfamily V member 2
TTPA	P49638	Alpha-tocopherol transfer protein
TTR	P02766	Transthyretin
Tyr	P14679	Tyrosinase
UGCG	Q16739	Ceramide glucosyltransferase
VCP	P55072	Transitional endoplasmic reticulum ATPase
XDH	P47989	Xanthine dehydrogenase/oxidase
